# Supplementary material for: Novel DNA methylation signatures of tobacco smoking with trans-ethnic effects
Source: PubMed Central journal article supplement (PMC7888173; doi:10.1186/s13148-021-01018-4), 2021-02-16

1a

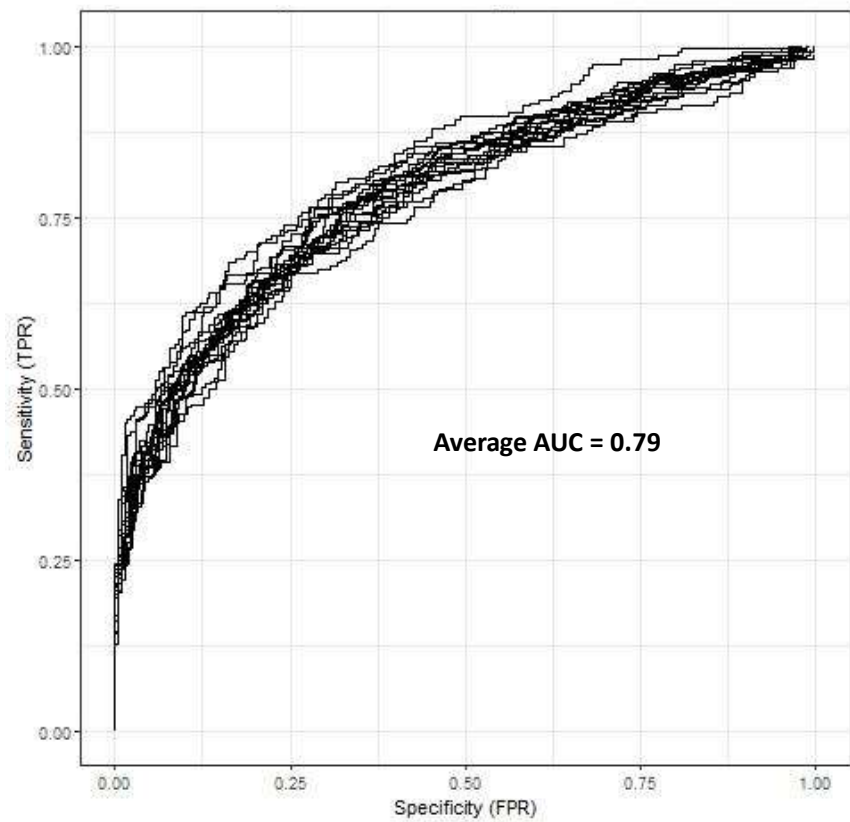

1b

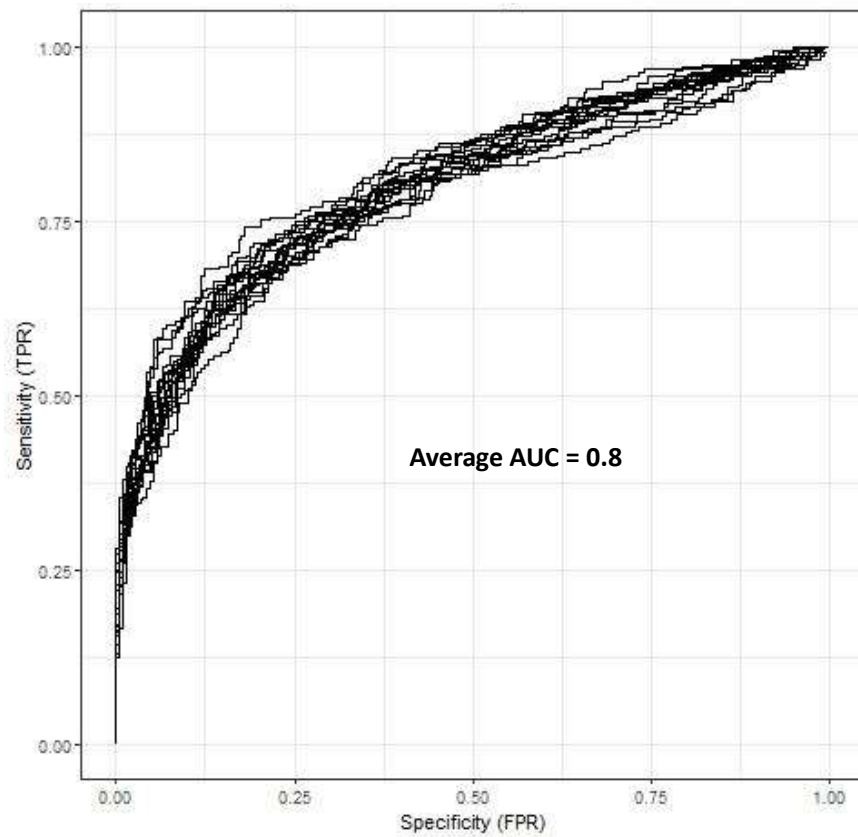

Supplement: 13148_2021_1018_MOESM3_ESM.pdf [file 13148_2021_1018_MOESM3_ESM.pdf]
