# Supplementary material for: Novel DNA methylation signatures of tobacco smoking with trans-ethnic effects
Source: Clin Epigenetics. 2021 Feb 16;13:36. doi: 10.1186/s13148-021-01018-4 (PMC7888173; doi:10.1186/s13148-021-01018-4)
Supplement: Supplementary file 2 — Additional file 2: Table S1. Statistically significant CpGs in relation to current versus never smoking status at false discovery rate (FDR) < 0.01. Table S2. Statistically significant CpGs in relation to current versus never smoking status at a Bonferroni-adjusted threshold (P value = 6.25 × 10–8). Table S3. Statistically significant CpGs in relation to former versus never smoking status at false discovery rate (FDR) < 0.01. Table S4. Statistically significant CpGs in replication meta-analysis relation to current versus non-smoking status at a Bonferroni-adjusted threshold (P value = 9.5 × 10−5). Table S5. Pathway Analysis (IPA) results. [file 13148_2021_1018_MOESM2_ESM.xlsx]

## Sheet: README
Additional file 2: Tables	Description
1	Statistically significant CpGs in relation to current vs. non smoking status at false discovery rate (FDR)<0.01
2	Statistically significant CpGs in relation to current vs. non smoking status at a Bonferroni adjusted threshold (P-value = 6.25 x 10-8)
3	Statistically significant CpGs in relation to former vs. non smoking status at false discovery rate (FDR)<0.01
4	Statistically significant CpGs in replication meta-analysis in relation to current vs. non smoking status at a Bonferroni adjusted threshold (P-value = 9.5 x 10-5)
5	Pathway Analysis (IPA) results

## Sheet: S1
Additional file 2: Table S1. Statistically significant CpGs in relation to current vs. non smoking status at false discovery rate (FDR)<0.01
IlmnID	P-value	Effect (+ hypermethylation, - hypomethylation)	FDR	Chr	Mapinfo	Gene	Location	In 450k	Novel
cg14391737	1.97e-92	-----	3.49843e-87	11	86513429	PRSS23	5'UTR;Body;Body;5'UTR;Body;Body;Body	FALSE	Yes
cg17739917	6.49e-92	-----	9.22023e-87	17	38477572	RARA	5'UTR;5'UTR;5'UTR	FALSE	Yes
cg00475490	1.06e-67	-----	1.07566e-62	11	86517110	PRSS23	5'UTR;Body;Body;5'UTR;Body;Body;Body	FALSE	Yes
cg16841366	2.45e-66	-----	2.17542e-61	2	233286192			FALSE	Yes
cg18110140	3.24e-63	-----	2.55723e-58	15	75350380			FALSE	Yes
cg00045592	1.39e-59	-----	9.87374e-55	1	160714299	SLAMF7	5'UTR;Body;Body;Body;Body;Body;Body;Body;Body;Body	FALSE	Yes
cg05086879	1.06e-45	-----	3.96296e-41	22	39861490	MGAT3	5'UTR	FALSE	Yes
cg09010260	2.12e-39	-----	6.02369e-35	12	54842484	LOC102724050	Body;Body	FALSE	Yes
cg24797066	4.66e-38	-----	1.27315e-33	20	48407084			FALSE	Yes
cg09945032	4.71e-37	-----	1.23915e-32	3	38871019			FALSE	Yes
cg07741821	1.87e-36	-----	4.74406e-32	7	26577897	KIAA0087	Body	FALSE	Yes
cg02738868	2.78e-35	-----	6.80948e-31	14	74221164	ELMSAN1	5'UTR;5'UTR	FALSE	Yes
cg05934812	3.88e-35	-----	9.18708e-31	5	334322	AHRR	Body;Body	FALSE	Yes
cg25001882	4.98e-35	-----	1.14113e-30	14	78619077			FALSE	Yes
cg25845814	6.73e-35	-----	1.49394e-30	14	74224613	ELMSAN1	TSS1500;5'UTR;5'UTR	FALSE	Yes
cg09338374	2.37e-34	+++++	4.95149e-30	22	39888390			FALSE	Yes
cg09834951	1.48e-33	-----	2.92029e-29	19	1265877			FALSE	Yes
cg19885130	1.56e-33	----?	2.99495e-29	11	68146832	LRP5	5'UTR;Body	FALSE	Yes
cg13258799	2.73e-31	-----	4.72983e-27	15	28413705	HERC2	Body	FALSE	Yes
cg02978227	4.67e-31	-----	7.89832e-27	3	98292027			FALSE	Yes
cg22440155	2.97e-30	+++++	4.68825e-26	19	2664262	GNG7	5'UTR	FALSE	Yes
cg25197654	7.79e-30	-----	1.17735e-25	8	21914006	DTMN	TSS1500;5'UTR;5'UTR;5'UTR;5'UTR	FALSE	Yes
cg10765427	1.65e-29	-----	2.4418e-25	19	17005225	CPAMD8	Body	FALSE	Yes
cg25558667	1.41e-27	-----	1.86793e-23	X	10075110	WWC3	Body	FALSE	Yes
cg17738628	4.29e-27	-----	5.54066e-23	15	67155520			FALSE	Yes
cg05009104	1.5e-26	+++++	1.83709e-22	7	45002980	MYO1G	Body	FALSE	Yes
cg26673040	3.6e-26	-----	4.33428e-22	2	67157193	LOC101060019	Body	FALSE	Yes
cg05533761	5.62e-26	----?	6.65353e-22	11	86437953			FALSE	Yes
cg24577031	1.64e-25	-----	1.87897e-21	15	75023481			FALSE	Yes
cg14096828	4.66e-25	-----	5.0926e-21	7	110731116	LRRN3;IMMP2L	1stExon;1stExon;1stExon;5'UTR;5'UTR;5'UTR;Body;Body	FALSE	Yes
cg07943658	5.24e-25	+++++	5.63968e-21	5	352001	AHRR	Body;Body	FALSE	Yes
cg07812250	2.72e-23	-----	2.61098e-19	16	15601462	C16orf45	Body;Body	FALSE	Yes
cg24171547	6.72e-23	-----	6.23624e-19	11	118753670	CXCR5	TSS1500	FALSE	Yes
cg06708913	7.92e-23	-----	7.21269e-19	12	90274556			FALSE	Yes
cg22222502	8.57e-23	-----	7.70585e-19	5	150161551	SMIM3	5'UTR	FALSE	Yes
cg06421013	2.25e-22	-----	1.97317e-18	20	19194143	SLC24A3	Body	FALSE	Yes
cg23407476	8.82e-22	-----	7.6405e-18	7	45019461	MYO1G	TSS1500	FALSE	Yes
cg25061445	1.03e-21	-----	8.7947e-18	15	57912784	GCOM1	Body;Body;Body;Body;Body;Body;Body;Body;Body;Body	FALSE	Yes
cg04414766	2.49e-21	+++++	2.05668e-17	3	22412963			FALSE	Yes
cg20294744	3.99e-21	-----	3.18456e-17	13	48978285	RB1	Body	FALSE	Yes
cg11931220	6.58e-21	-----	5.13631e-17	12	49276387			FALSE	Yes
cg23583523	1.01e-20	-----	7.79831e-17	11	118087893	AMICA1;AMICA1	5'UTR;5'UTR	FALSE	Yes
cg03028088	1.2e-20	-----	9.16569e-17	10	63843221	ARID5B;ARID5B	Body;Body	FALSE	Yes
cg16758086	1.65e-20	+++++	1.24688e-16	1	6173356	CHD5	Body	FALSE	Yes
cg23068081	3.65e-20	-----	2.70078e-16	2	109268809	LIMS1;LIMS1;LIMS1;LIMS1;LIMS1	5'UTR;5'UTR;Body;Body;Body	FALSE	Yes
cg18158149	1.32e-19	-----	9.01587e-16	1	162138215	NOS1AP;NOS1AP	Body;Body	FALSE	Yes
cg22675726	2.05e-19	-----	1.36757e-15	18	3179889	MYOM1;MYOM1	Body;Body	FALSE	Yes
cg05753553	2.06e-19	+++++	1.36757e-15	17	2689486			FALSE	Yes
cg20174472	2.4e-19	-----	1.57854e-15	20	61283288	SLCO4A1	5'UTR	FALSE	Yes
cg22551157	4.92e-19	-----	3.10538e-15	12	66342368	HMGA2;HMGA2	Body;Body	FALSE	Yes
cg06831571	7.71e-19	+++++	4.80415e-15	11	34592196			FALSE	Yes
cg04182427	8.61e-19	-----	5.31829e-15	7	32315577	PDE1C	Body	FALSE	Yes
cg00731338	9.66e-19	+++++	5.86487e-15	5	346963	AHRR;AHRR	Body;Body	FALSE	Yes
cg07865653	2.45e-18	-----	1.4265e-14	9	35027046			FALSE	Yes
cg03253449	2.45e-18	-----	1.4265e-14	9	14213559	NFIB;NFIB;NFIB	Body;Body;Body	FALSE	Yes
cg19832381	4.9e-18	-----	2.80699e-14	6	27776524	HIST1H2BL;HIST1H3H	TSS1500;TSS1500	FALSE	Yes
cg21026639	6.82e-18	-----	3.87562e-14	12	54656343	CBX5	5'UTR	FALSE	Yes
cg15088912	1.28e-17	-----	7.21616e-14	13	48987465	LPAR6;LPAR6;LPAR6;LPAR6;RB1	1stExon;5'UTR;5'UTR;5'UTR;Body	FALSE	Yes
cg17419818	2.36e-17	-----	1.29954e-13	8	103120736	NCALD;NCALD;NCALD;NCALD;NCALD;NCALD;NCALD	5'UTR;5'UTR;5'UTR;5'UTR;5'UTR;5'UTR;5'UTR	FALSE	Yes
cg01237738	4.43e-17	-----	2.36602e-13	11	102322056	TMEM123	Body	FALSE	Yes
cg01010073	6.75e-17	-----	3.52559e-13	7	45065573	CCM2;CCM2;CCM2;CCM2	Body;Body;Body;Body	FALSE	Yes
cg24616450	7.66e-17	+++++	3.94291e-13	1	19940140	MINOS1;MINOS1;MINOS1-NBL1;MINOS1;MINOS1;MINOS1;MINOS1-NBL1	Body;Body;5'UTR;Body;Body;Body;Body	FALSE	Yes
cg17805294	8.6e-17	-----	4.33258e-13	18	43408770	SIGLEC15	Body	FALSE	Yes
cg20832643	1e-16	-----	5.0024e-13	6	111873828	TRAF3IP2-AS1;TRAF3IP2-AS1;TRAF3IP2-AS1	Body;Body;Body	FALSE	Yes
cg02786339	1.16e-16	-----	5.76221e-13	10	79373331	KCNMA1;KCNMA1;KCNMA1;KCNMA1;KCNMA1;KCNMA1	Body;Body;Body;Body;Body;Body	FALSE	Yes
cg23508991	2.71e-16	-----	1.3276e-12	13	30694031			FALSE	Yes
cg25054107	3.06e-16	-----	1.4888e-12	20	43201588	PKIG;PKIG;PKIG;PKIG	5'UTR;5'UTR;5'UTR;5'UTR	FALSE	Yes
cg13705457	3.28e-16	+++++	1.57427e-12	11	34592254			FALSE	Yes
cg19701538	3.72e-16	-----	1.76165e-12	16	17474952	XYLT1	Body	FALSE	Yes
cg06053307	4.22e-16	-----	1.98519e-12	6	111873688	TRAF3IP2-AS1;TRAF3IP2-AS1;TRAF3IP2-AS1	Body;Body;Body	FALSE	Yes
cg07663850	4.52e-16	-----	2.11233e-12	7	5517419	FBXL18	3'UTR	FALSE	Yes
cg25730803	5.12e-16	-----	2.36165e-12	22	43150790			FALSE	Yes
cg10258214	7.6e-16	-----	3.43859e-12	14	106330534			FALSE	Yes
cg15310518	8.09e-16	-----	3.63713e-12	14	106330520			FALSE	Yes
cg00977926	8.33e-16	+++++	3.72147e-12	5	53411883	ARL15	Body	FALSE	Yes
cg27271698	1.16e-15	-----	5.14997e-12	14	106330538			FALSE	Yes
cg21774980	2.02e-15	-----	8.74932e-12	20	34090548	CEP250	Body	FALSE	Yes
cg16251918	2.15e-15	-----	9.25596e-12	10	80873603	ZMIZ1	5'UTR	FALSE	Yes
cg04902004	3.01e-15	-----	1.28032e-11	14	91711165	GPR68;GPR68	TSS1500;5'UTR	FALSE	Yes
cg07803149	3.68e-15	-----	1.54678e-11	3	45068568	CLEC3B	Body	FALSE	Yes
cg07667906	4.2e-15	-----	1.75301e-11	14	106329752			FALSE	Yes
cg14513685	4.3e-15	-----	1.77585e-11	15	92619028	SLCO3A1;SLCO3A1	Body;Body	FALSE	Yes
cg16207944	5.09e-15	-----	2.07795e-11	14	106331592			FALSE	Yes
cg15051432	5.31e-15	-----	2.14313e-11	3	99929690			FALSE	Yes
cg15851905	7.2e-15	-----	2.84136e-11	4	77928471	SEPT11;SEPT11	Body;Body	FALSE	Yes
cg15480998	8.5e-15	-----	3.33586e-11	10	79373438	KCNMA1;KCNMA1;KCNMA1;KCNMA1;KCNMA1;KCNMA1	Body;Body;Body;Body;Body;Body	FALSE	Yes
cg23662846	1.04e-14	-----	4.05909e-11	15	91416006	FURIN;FURIN;FURIN	5'UTR;5'UTR;TSS200	FALSE	Yes
cg15885703	1.12e-14	-----	4.34744e-11	11	118094830	AMICA1;AMICA1	5'UTR;5'UTR	FALSE	Yes
cg09981964	1.29e-14	+++++	4.95319e-11	7	148001779	CNTNAP2;MIR548T	Body;Body	FALSE	Yes
cg01247535	1.36e-14	-----	5.16612e-11	6	15418354	JARID2;JARID2	Body;5'UTR	FALSE	Yes
cg26332838	1.48e-14	-----	5.59205e-11	12	55840205			FALSE	Yes
cg17651613	1.58e-14	-----	5.9383e-11	8	143111540			FALSE	Yes
cg17290454	1.59e-14	+++++	5.94443e-11	1	210690463	HHAT;HHAT;HHAT;HHAT;HHAT;HHAT	Body;Body;Body;Body;Body;Body	FALSE	Yes
cg00819417	1.61e-14	-----	5.98769e-11	17	29698916	NF1;NF1	Body;Body	FALSE	Yes
cg09656629	1.63e-14	-----	5.99925e-11	6	162572090	PARK2;PARK2;PARK2	Body;Body;Body	FALSE	Yes
cg26892401	1.88e-14	-----	6.88372e-11	7	2847908	GNA12;GNA12;GNA12	Body;Body;Body	FALSE	Yes
cg07097487	1.92e-14	+++++	6.95844e-11	22	47202960	TBC1D22A;TBC1D22A;TBC1D22A;TBC1D22A;TBC1D22A	Body;Body;Body;Body;Body	FALSE	Yes
cg17588460	2.72e-14	-----	9.61257e-11	11	118090742	AMICA1;AMICA1	5'UTR;5'UTR	FALSE	Yes
cg02920129	2.92e-14	-----	1.01676e-10	3	21792195	ZNF385D	Body	FALSE	Yes
cg27650500	3.29e-14	-----	1.14001e-10	1	25298480			FALSE	Yes
cg10358466	4.12e-14	-----	1.41382e-10	3	168958728	MECOM;MECOM	5'UTR;Body	FALSE	Yes
cg05445320	4.17e-14	-----	1.4241e-10	20	45985736	ZMYND8;ZMYND8;ZMYND8;ZMYND8;ZMYND8;ZMYND8;ZMYND8;ZMYND8;ZMYND8;ZMYND8;ZMYND8;ZMYND8;ZMYND8;ZMYND8;ZMYND8;ZMYND8;ZMYND8;ZMYND8	TSS200;TSS200;TSS200;TSS200;TSS200;TSS200;TSS200;TSS200;TSS200;TSS200;TSS200;TSS200;TSS200;TSS200;TSS200;TSS200;TSS200;TSS200	FALSE	Yes
cg11943735	4.34e-14	+++++	1.47506e-10	4	6260806			FALSE	Yes
cg16470128	4.73e-14	-----	1.59157e-10	3	12466092	PPARG;PPARG;PPARG;PPARG	Body;Body;Body;Body	FALSE	Yes
cg12009405	4.75e-14	-----	1.59157e-10	6	148651331			FALSE	Yes
cg15801526	5.69e-14	+++++	1.89758e-10	1	62353410	INADL	Body	FALSE	Yes
cg01756827	6.1e-14	+++++	2.0248e-10	20	47923790			FALSE	Yes
cg02786370	6.58e-14	-----	2.17397e-10	4	2747928	TNIP2;TNIP2;TNIP2	Body;Body;Body	FALSE	Yes
cg20328799	7.86e-14	+++++	2.57294e-10	2	120985492			FALSE	Yes
cg04455670	8.81e-14	-----	2.84459e-10	4	169803020	PALLD;PALLD;PALLD;PALLD	Body;Body;Body;Body	FALSE	Yes
cg05157376	9.48e-14	-----	3.04707e-10	1	92781750	RPAP2	Body	FALSE	Yes
cg03977382	1.17e-13	-----	3.71026e-10	11	99564911	CNTN5;CNTN5;CNTN5;CNTN5	Body;Body;Body;Body	FALSE	Yes
cg15396830	1.42e-13	-----	4.42405e-10	4	90224479	GPRIN3	5'UTR	FALSE	Yes
cg05547483	1.5e-13	----?	4.65289e-10	7	80741676			FALSE	Yes
cg02919526	1.75e-13	-----	5.38137e-10	11	118758721	CXCR5	Body	FALSE	Yes
cg23162675	2.93e-13	-----	8.81906e-10	7	154990285			FALSE	Yes
cg06521527	3.03e-13	-----	9.08157e-10	6	11217462	NEDD9;NEDD9;NEDD9;NEDD9;NEDD9	Body;Body;Body;Body;Body	FALSE	Yes
cg02775989	3.3e-13	+++++	9.76719e-10	17	47465656			FALSE	Yes
cg14768892	3.48e-13	-----	1.02572e-09	15	39915931	FSIP1	Body	FALSE	Yes
cg14335029	3.54e-13	-----	1.03909e-09	9	134277886			FALSE	Yes
cg26687886	3.65e-13	+++++	1.06697e-09	17	16891478			FALSE	Yes
cg12919873	3.92e-13	-----	1.13655e-09	21	38929815			FALSE	Yes
cg25290553	3.92e-13	-----	1.13655e-09	2	129146270			FALSE	Yes
cg08493167	3.98e-13	---?-	1.1446e-09	14	106329560			FALSE	Yes
cg27521648	4.16e-13	-----	1.18675e-09	3	98293016			FALSE	Yes
cg07390844	4.6e-13	-----	1.30182e-09	18	72935911	TSHZ1;TSHZ1	5'UTR;Body	FALSE	Yes
cg26931213	4.64e-13	+++++	1.30793e-09	8	23526066			FALSE	Yes
cg16959792	4.66e-13	-----	1.30838e-09	1	155107224	SLC50A1;SLC50A1;SLC50A1;EFNA1;EFNA1;SLC50A1;SLC50A1;SLC50A1;SLC50A1;SLC50A1;SLC50A1;SLC50A1	TSS1500;TSS1500;TSS1500;3'UTR;3'UTR;TSS1500;TSS1500;TSS1500;TSS1500;TSS1500;TSS1500;TSS1500	FALSE	Yes
cg00010201	4.93e-13	----?	1.37333e-09	3	98287106			FALSE	Yes
cg14491800	5.49e-13	-----	1.51742e-09	14	77385166			FALSE	Yes
cg08515723	6.16e-13	-----	1.69601e-09	3	177256617	LINC00578	Body	FALSE	Yes
cg01641754	6.39e-13	-----	1.75254e-09	5	98355983			FALSE	Yes
cg13682152	6.57e-13	-----	1.79498e-09	19	16996186			FALSE	Yes
cg17342080	7.65e-13	-----	2.07409e-09	1	9474427			FALSE	Yes
cg15277721	7.93e-13	-----	2.14183e-09	8	129243228			FALSE	Yes
cg02423587	9.01e-13	+++++	2.42431e-09	1	36059379	TFAP2E	Body	FALSE	Yes
cg16508202	1.01e-12	+++++	2.69716e-09	7	147501016	CNTNAP2	Body	FALSE	Yes
cg05480247	1.02e-12	+++++	2.71366e-09	8	6669370	XKR5;XKR5	Body;Body	FALSE	Yes
cg05866990	1.06e-12	+++++	2.80956e-09	11	34592252			FALSE	Yes
cg19278199	1.17e-12	-----	3.08959e-09	4	143324267	INPP4B;INPP4B	Body;Body	FALSE	Yes
cg06566669	1.18e-12	-----	3.10445e-09	10	129536394	FOXI2	Body	FALSE	Yes
cg10092685	1.27e-12	-----	3.3289e-09	16	73090591	ZFHX3	5'UTR	FALSE	Yes
cg20540629	1.29e-12	-----	3.3689e-09	17	46318630	SKAP1;SKAP1	Body;Body	FALSE	Yes
cg14128479	1.35e-12	-----	3.48713e-09	8	126522705			FALSE	Yes
cg17547179	1.43e-12	-----	3.65391e-09	7	45068955	CCM2;CCM2;CCM2;CCM2;CCM2	Body;Body;Body;Body;Body	FALSE	Yes
cg15241876	1.47e-12	-----	3.74266e-09	22	37257594	NCF4;NCF4	Body;Body	FALSE	Yes
cg21163477	1.61e-12	-----	4.06993e-09	16	17439164	XYLT1	Body	FALSE	Yes
cg16143121	1.65e-12	+++++	4.15625e-09	13	30929119	LINC00426	Body	FALSE	Yes
cg20184330	1.97e-12	-----	4.87586e-09	14	74228393	ELMSAN1;ELMSAN1	TSS1500;5'UTR	FALSE	Yes
cg11320225	2.14e-12	-----	5.24183e-09	1	161709963			FALSE	Yes
cg25520710	2.2e-12	-----	5.37028e-09	20	45981300	ZMYND8;ZMYND8;ZMYND8;ZMYND8;ZMYND8;ZMYND8;ZMYND8;ZMYND8;ZMYND8;ZMYND8;ZMYND8;ZMYND8;ZMYND8;ZMYND8;ZMYND8;ZMYND8;ZMYND8;ZMYND8	5'UTR;5'UTR;5'UTR;5'UTR;5'UTR;Body;Body;Body;Body;Body;Body;Body;Body;Body;Body;Body;Body;Body	FALSE	Yes
cg22014359	2.29e-12	-----	5.57082e-09	22	39854490	MGAT3	5'UTR	FALSE	Yes
cg12609247	2.35e-12	-----	5.6779e-09	7	130611417			FALSE	Yes
cg23409325	2.48e-12	-----	5.97168e-09	16	11296711			FALSE	Yes
cg18871648	2.53e-12	-----	6.0715e-09	14	74227431	ELMSAN1;ELMSAN1	TSS1500;5'UTR	FALSE	Yes
cg27230739	2.66e-12	+++++	6.31942e-09	5	138280522			FALSE	Yes
cg18644227	2.72e-12	-----	6.39777e-09	1	161710013			FALSE	Yes
cg19881433	2.72e-12	-----	6.39777e-09	7	24922755	OSBPL3;OSBPL3;OSBPL3;OSBPL3;OSBPL3;OSBPL3	Body;Body;Body;Body;Body;Body	FALSE	Yes
cg04003530	2.77e-12	+++++	6.49388e-09	12	127981035			FALSE	Yes
cg03779490	2.99e-12	-----	6.98658e-09	6	158069542	ZDHHC14;ZDHHC14	Body;Body	FALSE	Yes
cg13318355	3.08e-12	+++++	7.14984e-09	7	6072034	ANKRD61;EIF2AK1;EIF2AK1	Body;Body;Body	FALSE	Yes
cg10041129	3.38e-12	-----	7.7953e-09	11	117685550			FALSE	Yes
cg17309085	3.4e-12	-----	7.81605e-09	11	99564894	CNTN5;CNTN5;CNTN5;CNTN5	Body;Body;Body;Body	FALSE	Yes
cg16146513	3.63e-12	+++++	8.31786e-09	19	39801853	LRFN1	Body	FALSE	Yes
cg14241868	3.75e-12	+++++	8.5652e-09	12	57937454	DCTN2;DCTN2;DCTN2	Body;Body;Body	FALSE	Yes
cg14377032	3.82e-12	-----	8.69712e-09	2	74758236	AUP1;AUP1;AUP1;HTRA2;HTRA2;HTRA2	TSS1500;TSS1500;TSS1500;Body;Body;ExonBnd	FALSE	Yes
cg22585799	3.96e-12	-----	8.98706e-09	10	121543364	INPP5F;INPP5F	Body;Body	FALSE	Yes
cg14162418	5.26e-12	-----	1.17867e-08	11	121336707	SORL1	Body	FALSE	Yes
cg14535553	5.39e-12	-----	1.20401e-08	16	66995103	CES3;CES3	TSS200;TSS200	FALSE	Yes
cg11307144	5.43e-12	-----	1.20914e-08	18	5514289	EPB41L3;EPB41L3;EPB41L3;EPB41L3	5'UTR;5'UTR;5'UTR;5'UTR	FALSE	Yes
cg07256895	6.42e-12	+++++	1.42068e-08	15	56830284			FALSE	Yes
cg12710546	6.57e-12	+++++	1.44936e-08	7	4773768	FOXK1	Body	FALSE	Yes
cg18105732	6.83e-12	-----	1.49742e-08	20	12188599			FALSE	Yes
cg13343932	7.02e-12	-----	1.52963e-08	17	76355061	SOCS3;LOC101928674;LOC101928674	Body;TSS1500;TSS1500	FALSE	Yes
cg01584377	7.02e-12	+++++	1.52963e-08	7	139521372	TBXAS1;TBXAS1	5'UTR;5'UTR	FALSE	Yes
cg24207603	7.56e-12	-----	1.63227e-08	5	142555986	ARHGAP26;ARHGAP26	Body;Body	FALSE	Yes
cg24617344	7.69e-12	-----	1.65531e-08	16	30483713	ITGAL;ITGAL	TSS1500;TSS1500	FALSE	Yes
cg24021808	8.94e-12	+++++	1.90704e-08	13	40805588			FALSE	Yes
cg13849276	9.28e-12	-----	1.97364e-08	17	41328544	NBR1;NBR1;NBR1;NBR1	Body;Body;Body;Body	FALSE	Yes
cg01651583	1.12e-11	+++++	2.34685e-08	10	45899264	ALOX5;ALOX5;ALOX5	Body;Body;Body	FALSE	Yes
cg12804716	1.12e-11	+++++	2.34685e-08	14	58604949	C14orf37	Body	FALSE	Yes
cg09156714	1.17e-11	+++++	2.43724e-08	21	37110991			FALSE	Yes
cg02732789	1.23e-11	-----	2.54729e-08	16	17491177	XYLT1	Body	FALSE	Yes
cg25222362	1.25e-11	+++++	2.58118e-08	8	140119546			FALSE	Yes
cg14262884	1.47e-11	-----	2.99198e-08	11	43757533	HSD17B12	Body	FALSE	Yes
cg25089400	1.49e-11	+++++	3.01541e-08	12	7651706	CD163	Body;Body	FALSE	Yes
cg08445278	1.54e-11	+++++	3.10774e-08	22	30671877			FALSE	Yes
cg02008229	1.63e-11	+++++	3.27078e-08	15	90346089	ANPEP	Body	FALSE	Yes
cg16220933	1.68e-11	+++++	3.36161e-08	2	197041071			FALSE	Yes
cg08215583	1.87e-11	-----	3.71044e-08	6	25166934			FALSE	Yes
cg08444340	1.88e-11	-----	3.71989e-08	2	149823755	KIF5C	Body;Body	FALSE	Yes
cg26782583	1.96e-11	+++++	3.8567e-08	3	65398449	MAGI1	Body;Body;Body	FALSE	Yes
cg14214717	2.06e-11	+++++	4.03114e-08	20	5466839			FALSE	Yes
cg23034197	2.07e-11	+++++	4.03958e-08	2	205918689	PARD3B	Body;Body;Body;Body	FALSE	Yes
cg26987759	2.15e-11	+++++	4.15009e-08	5	322546	AHRR	Body;Body	FALSE	Yes
cg25614265	2.29e-11	-----	4.40835e-08	2	223924453			FALSE	Yes
cg15526732	2.35e-11	-----	4.51163e-08	14	35883749			FALSE	Yes
cg22834580	2.38e-11	+++++	4.5569e-08	10	13546267	BEND7	TSS1500;TSS1500	FALSE	Yes
cg06034194	2.47e-11	-----	4.70387e-08	9	12814626	LURAP1L-AS1;LURAP1L	TSS1500;Body	FALSE	Yes
cg06586615	2.81e-11	---?-	5.30867e-08	1	155107648	SLC50A1	TSS200;TSS200;TSS200;TSS1500;TSS1500;TSS1500;TSS1500;TSS1500;TSS1500;TSS1500	FALSE	Yes
cg12329529	2.99e-11	-----	5.63374e-08	11	60822826			FALSE	Yes
cg10587886	3.01e-11	-----	5.65642e-08	3	8361835	LMCD1-AS1	Body	FALSE	Yes
cg15387619	3.08e-11	+++++	5.77269e-08	3	132316156	ACKR4;ACAD11;NPHP3-ACAD11	1stExon;Body;5'UTR;Body	FALSE	Yes
cg01868616	3.11e-11	-----	5.81358e-08	11	75041600	ARRB1	Body;Body	FALSE	Yes
cg03530002	3.31e-11	-----	6.13898e-08	9	38026091	SHB	Body	FALSE	Yes
cg18060905	3.49e-11	-----	6.4392e-08	14	106332077			FALSE	Yes
cg05723029	3.62e-11	+++++	6.64453e-08	18	10896785	PIEZO2	Body	FALSE	Yes
cg18110714	3.71e-11	-----	6.79218e-08	2	231846607			FALSE	Yes
cg09709426	3.72e-11	+++++	6.79298e-08	3	45911521	LZTFL1;LZTFL1	5'UTR;Body	FALSE	Yes
cg02372435	3.92e-11	+++++	7.08534e-08	2	2850104			FALSE	Yes
cg12999836	4.06e-11	-----	7.31976e-08	7	50791421	GRB10;GRB10;GRB10	Body;Body;5'UTR	FALSE	Yes
cg04700809	4.55e-11	-----	8.14119e-08	10	80954519	ZMIZ1	5'UTR	FALSE	Yes
cg00506062	4.87e-11	-----	8.69186e-08	20	45981165	ZMYND8;ZMYND8;ZMYND8;ZMYND8;ZMYND8;ZMYND8;ZMYND8;ZMYND8;ZMYND8;ZMYND8;ZMYND8;ZMYND8;ZMYND8;ZMYND8;ZMYND8;ZMYND8;ZMYND8;ZMYND8	5'UTR;5'UTR;5'UTR;5'UTR;5'UTR;Body;Body;Body;Body;Body;Body;Body;Body;Body;Body;Body;Body;Body	FALSE	Yes
cg27635797	5.1e-11	-----	9.03426e-08	1	190445000	BRINP3	5'UTR	FALSE	Yes
cg21095779	5.15e-11	-----	9.10014e-08	3	190336306	IL1RAP;IL1RAP;IL1RAP;IL1RAP;IL1RAP;IL1RAP	Body;Body;Body;Body;Body;Body	FALSE	Yes
cg23025288	5.27e-11	-----	9.28907e-08	2	129278724			FALSE	Yes
cg23902113	5.33e-11	-----	9.36598e-08	10	44757323			FALSE	Yes
cg01764256	5.37e-11	-----	9.3954e-08	20	45985832	ZMYND8;ZMYND8;ZMYND8;ZMYND8;ZMYND8;ZMYND8;ZMYND8;ZMYND8;ZMYND8;ZMYND8;ZMYND8;ZMYND8;ZMYND8;ZMYND8;ZMYND8;ZMYND8;ZMYND8;ZMYND8	TSS200;TSS200;TSS200;TSS200;TSS200;TSS200;TSS200;TSS200;TSS200;TSS200;TSS200;TSS200;TSS200;TSS200;TSS200;TSS200;TSS200;TSS200	FALSE	Yes
cg16142959	5.76e-11	-----	1.00283e-07	17	38480865	RARA;RARA;RARA	5'UTR;5'UTR;5'UTR	FALSE	Yes
cg10496919	5.86e-11	-----	1.01527e-07	15	31460028			FALSE	Yes
cg23337648	5.98e-11	-----	1.03354e-07	11	47546192	CELF1;CELF1	5'UTR;TSS1500	FALSE	Yes
cg11047325	6.34e-11	-----	1.09045e-07	17	76354934	SOCS3	Body	FALSE	Yes
cg22573230	6.81e-11	-----	1.16284e-07	17	7649271	DNAH2	Body	FALSE	Yes
cg27537214	7e-11	+++++	1.19242e-07	16	73262701			FALSE	Yes
cg07278718	7.61e-11	+++++	1.28097e-07	11	113932635	ZBTB16;ZBTB16	5'UTR;5'UTR	FALSE	Yes
cg05613192	8.24e-11	-----	1.37399e-07	2	223912416			FALSE	Yes
cg03236789	8.76e-11	+++++	1.45388e-07	7	28045202	JAZF1	Body	FALSE	Yes
cg14988493	8.98e-11	+++++	1.48346e-07	5	52549628			FALSE	Yes
cg26237233	9.92e-11	-----	1.63115e-07	11	80782064			FALSE	Yes
cg01593408	1.12e-10	-----	1.81226e-07	10	78699706	KCNMA1-AS1;KCNMA1;KCNMA1;KCNMA1;KCNMA1;KCNMA1;KCNMA1	Body;Body;Body;Body;Body;Body;Body	FALSE	Yes
cg01531127	1.38e-10	-----	2.1881e-07	17	1269083	YWHAE;YWHAE	Body;Body	FALSE	Yes
cg09123897	1.41e-10	----?	2.23069e-07	11	9774828			FALSE	Yes
cg01307360	1.54e-10	-----	2.43094e-07	7	32334947	PDE1C	Body	FALSE	Yes
cg08902828	1.56e-10	-----	2.45706e-07	5	400832	AHRR;AHRR	Body;Body	FALSE	Yes
cg15328025	1.59e-10	-----	2.48776e-07	1	155107693	SLC50A1;SLC50A1;SLC50A1;SLC50A1;SLC50A1;SLC50A1;SLC50A1;SLC50A1;SLC50A1;SLC50A1	TSS200;TSS200;TSS200;TSS1500;TSS1500;TSS1500;TSS1500;TSS1500;TSS1500;TSS1500	FALSE	Yes
cg02695372	1.59e-10	-----	2.48776e-07	7	106320126			FALSE	Yes
cg18115286	1.74e-10	-----	2.69868e-07	10	29681408			FALSE	Yes
cg25942611	1.8e-10	+++++	2.78565e-07	1	66999933	SGIP1;SGIP1;SGIP1;SGIP1	5'UTR;5'UTR;1stExon;ExonBnd	FALSE	Yes
cg04284610	1.85e-10	-----	2.85061e-07	21	40181558	ETS2;ETS2	5'UTR;Body	FALSE	Yes
cg21885332	1.85e-10	-----	2.85061e-07	15	67402345	SMAD3	Body	FALSE	Yes
cg17439633	1.86e-10	-----	2.85981e-07	11	57176260	SLC43A3;SLC43A3;SLC43A3;SLC43A3;SLC43A3	Body;Body;Body;Body;Body	FALSE	Yes
cg01310332	1.94e-10	+++++	2.95721e-07	12	116799230			FALSE	Yes
cg13531599	1.94e-10	+++++	2.95721e-07	20	42588358	TOX2;TOX2;TOX2;TOX2	Body;5'UTR;5'UTR;Body	FALSE	Yes
cg11487438	1.99e-10	+++++	3.02047e-07	12	57425186	MYO1A;MYO1A	Body;Body	FALSE	Yes
cg26686403	2.03e-10	-----	3.07461e-07	14	91710747	GPR68;GPR68;GPR68	5'UTR;1stExon;5'UTR	FALSE	Yes
cg21684640	2.06e-10	+++++	3.1068e-07	7	33843957			FALSE	Yes
cg15964874	2.09e-10	+++++	3.13872e-07	8	8924480			FALSE	Yes
cg15268992	2.1e-10	+++++	3.14708e-07	13	115029536	CDC16;CDC16	Body;Body	FALSE	Yes
cg15562617	2.12e-10	-----	3.17036e-07	16	80603721	LINC01227;LINC01227	Body;TSS1500	FALSE	Yes
cg05113537	2.2e-10	-----	3.28309e-07	8	103169068			FALSE	Yes
cg05659611	2.31e-10	-----	3.43282e-07	3	98240624	CLDND1;CLDND1;CLDND1;CLDND1;CLDND1;CLDND1	5'UTR;5'UTR;5'UTR;5'UTR;Body;Body	FALSE	Yes
cg06035956	2.42e-10	-----	3.5813e-07	5	379099	AHRR;AHRR	Body;Body	FALSE	Yes
cg11219720	2.55e-10	-----	3.75803e-07	5	453421	EXOC3	Body	FALSE	Yes
cg16522223	2.59e-10	-----	3.8012e-07	22	43400443	PACSIN2	5'UTR	FALSE	Yes
cg09279763	2.86e-10	-?---	4.18881e-07	7	2847477	GNA12;GNA12;GNA12	Body;Body;Body	FALSE	Yes
cg09449447	2.96e-10	+++++	4.31747e-07	21	37891373	CLDN14;CLDN14	5'UTR;5'UTR	FALSE	Yes
cg04009575	3.02e-10	-----	4.38697e-07	1	160714382	SLAMF7;SLAMF7;SLAMF7;SLAMF7;SLAMF7;SLAMF7;SLAMF7;SLAMF7;SLAMF7;SLAMF7	5'UTR;Body;Body;Body;Body;Body;Body;Body;Body;Body	FALSE	Yes
cg13459171	3.17e-10	----?	4.58611e-07	13	48986750	LPAR6;LPAR6;LPAR6;LPAR6;RB1	1stExon;5'UTR;5'UTR;5'UTR;Body	FALSE	Yes
cg21199085	3.27e-10	+++++	4.72117e-07	15	59469479	MYO1E	Body	FALSE	Yes
cg22232492	3.36e-10	+++++	4.83147e-07	20	12152900			FALSE	Yes
cg07948323	3.37e-10	+++++	4.83606e-07	4	82609377			FALSE	Yes
cg15167811	3.38e-10	-----	4.84063e-07	9	115094058	MIR3134;PTBP3;PTBP3;PTBP3;PTBP3;PTBP3;PTBP3	Body;Body;Body;Body;5'UTR;5'UTR;5'UTR	FALSE	Yes
cg14180330	3.43e-10	-----	4.90235e-07	5	40224461			FALSE	Yes
cg16459171	3.59e-10	+++++	5.11047e-07	5	10295079	CMBL	5'UTR	FALSE	Yes
cg20534846	3.61e-10	-----	5.12866e-07	9	8188954			FALSE	Yes
cg05726450	3.69e-10	+++++	5.22143e-07	17	8771947	PIK3R6;PIK3R6;PIK3R6	TSS1500;TSS1500;TSS1500	FALSE	Yes
cg06362176	3.98e-10	-----	5.59833e-07	9	127048628	NEK6;NEK6;NEK6;NEK6	Body;5'UTR;5'UTR;5'UTR	FALSE	Yes
cg18641655	4.45e-10	+++++	6.21025e-07	8	125025636	FER1L6;FER1L6-AS1	Body;Body	FALSE	Yes
cg03686998	4.82e-10	-----	6.67416e-07	14	106330224			FALSE	Yes
cg23683079	5.04e-10	-----	6.93821e-07	10	44353285			FALSE	Yes
cg12619810	5.04e-10	-----	6.93821e-07	3	39192455	CSRNP1	5'UTR	FALSE	Yes
cg22829098	5.22e-10	+++++	7.17211e-07	17	28053973	SSH2;SSH2;SSH2;SSH2	Body;Body;Body;Body	FALSE	Yes
cg20178893	5.25e-10	-----	7.1994e-07	1	164558298	PBX1;PBX1;PBX1	Body;Body;Body	FALSE	Yes
cg03786093	5.55e-10	-----	7.58152e-07	17	75371205	SEPT9;SEPT9;SEPT9;SEPT9;SEPT9;SEPT9	TSS1500;Body;Body;Body;5'UTR;Body	FALSE	Yes
cg08353847	5.63e-10	+++++	7.67605e-07	10	6968167			FALSE	Yes
cg04664595	5.87e-10	-----	7.97266e-07	14	95147289			FALSE	Yes
cg03910896	5.94e-10	-----	8.05234e-07	16	27254143	NSMCE1	Body	FALSE	Yes
cg25429619	6.12e-10	+++++	8.2626e-07	1	174846521	RABGAP1L;RABGAP1L;RABGAP1L;RABGAP1L;RABGAP1L;RABGAP1L	5'UTR;5'UTR;ExonBnd;ExonBnd;Body;Body	FALSE	Yes
cg21863544	6.13e-10	-----	8.2626e-07	6	12528631			FALSE	Yes
cg13681954	6.19e-10	-----	8.32767e-07	2	122656302			FALSE	Yes
cg18268027	6.41e-10	-----	8.60451e-07	3	4818913	ITPR1;ITPR1;ITPR1	Body;Body;Body	FALSE	Yes
cg10609883	6.44e-10	+++++	8.61506e-07	11	35835819			FALSE	Yes
cg01926616	6.48e-10	-----	8.65227e-07	11	115796067			FALSE	Yes
cg15490177	6.6e-10	+++++	8.79597e-07	4	151540382	LRBA;LRBA	Body;Body	FALSE	Yes
cg06344992	6.79e-10	+++++	9.03224e-07	15	90345999	ANPEP	Body	FALSE	Yes
cg22792560	6.85e-10	+++++	9.09502e-07	4	152446017	FAM160A1	5'UTR	FALSE	Yes
cg14526576	7.2e-10	-----	9.54189e-07	7	139367822	HIPK2;HIPK2	Body;Body	FALSE	Yes
cg20481941	7.67e-10	-----	1.01458e-06	16	80604148	LINC01227;LINC01227	Body;TSS1500	FALSE	Yes
cg26031947	7.79e-10	-----	1.02854e-06	6	111139131	AMD1	5'UTR	FALSE	Yes
cg07045119	7.96e-10	-----	1.04516e-06	20	19194540	SLC24A3	Body	FALSE	Yes
cg02042026	7.96e-10	+++++	1.04516e-06	11	113936782	ZBTB16;ZBTB16	Body;Body	FALSE	Yes
cg15143202	8.06e-10	-----	1.05634e-06	3	168866525	MECOM;MECOM;MECOM	TSS1500;5'UTR;Body	FALSE	Yes
cg02243025	8.14e-10	-----	1.06486e-06	6	10655811			FALSE	Yes
cg15167367	8.23e-10	-----	1.07465e-06	2	113933123	PSD4	5'UTR	FALSE	Yes
cg26014782	8.28e-10	+++++	1.07852e-06	3	124840721	SLC12A8;SLC12A8	Body;Body	FALSE	Yes
cg00271766	8.29e-10	-----	1.07852e-06	22	33172767	SYN3;SYN3;SYN3	Body;Body;Body	FALSE	Yes
cg07978331	8.31e-10	-----	1.07915e-06	16	75046041	ZNRF1	Body	FALSE	Yes
cg04560781	8.62e-10	+++++	1.11128e-06	2	129511579			FALSE	Yes
cg16111704	8.83e-10	-----	1.13423e-06	6	41673829	TFEB;TFEB;TFEB;TFEB;TFEB	Body;5'UTR;5'UTR;5'UTR;5'UTR	FALSE	Yes
cg15627993	8.96e-10	+++++	1.14678e-06	18	13628426	LDLRAD4;LDLRAD4;LDLRAD4;LDLRAD4;LDLRAD4	Body;Body;Body;Body;Body	FALSE	Yes
cg06049452	9.41e-10	-----	1.20006e-06	20	32432074	CHMP4B	Body	FALSE	Yes
cg11697045	9.5e-10	+++++	1.20936e-06	16	13416540			FALSE	Yes
cg27444020	9.58e-10	+++++	1.21736e-06	11	78108461	GAB2	Body	FALSE	Yes
cg24126994	9.66e-10	----?	1.22534e-06	14	90086171	FOXN3	TSS1500	FALSE	Yes
cg03924136	9.85e-10	+++++	1.24721e-06	20	62367108	LIME1;LIME1;LIME1;LIME1;ZGPAT;ZGPAT;ZGPAT;ZGPAT;ZGPAT	TSS1500;TSS1500;1stExon;5'UTR;Body;Body;Body;Body;Body	FALSE	Yes
cg22375046	1.02e-09	-----	1.28694e-06	11	126236634	ST3GAL4;ST3GAL4	5'UTR;5'UTR	FALSE	Yes
cg13117318	1.03e-09	-----	1.29725e-06	17	74242643			FALSE	Yes
cg23491443	1.06e-09	+++++	1.33268e-06	12	54230081			FALSE	Yes
cg08208903	1.09e-09	-----	1.36797e-06	12	90341154			FALSE	Yes
cg21575225	1.12e-09	-----	1.40067e-06	1	156073485	LMNA	5'UTR	FALSE	Yes
cg09287749	1.13e-09	-----	1.41069e-06	X	10076637	WWC3	Body	FALSE	Yes
cg02327909	1.15e-09	+++++	1.43063e-06	12	53009774	KRT73	Body	FALSE	Yes
cg04327143	1.17e-09	+++++	1.45043e-06	5	135226781			FALSE	Yes
cg17631924	1.17e-09	+++++	1.45043e-06	17	26361207			FALSE	Yes
cg07267541	1.24e-09	-----	1.52391e-06	9	12784592	LURAP1L;LURAP1L-AS1	Body;Body	FALSE	Yes
cg11960913	1.24e-09	-----	1.52391e-06	11	70160494	PPFIA1;PPFIA1;PPFIA1	Body;Body;Body	FALSE	Yes
cg09965980	1.26e-09	-----	1.5405e-06	13	28876143	FLT1	3'UTR	FALSE	Yes
cg04213565	1.29e-09	+++++	1.56908e-06	5	35900039			FALSE	Yes
cg21668652	1.3e-09	+++++	1.57854e-06	17	55749538	MSI2	Body	FALSE	Yes
cg24211550	1.43e-09	-----	1.7246e-06	17	38758156			FALSE	Yes
cg24665592	1.45e-09	----?	1.74575e-06	4	41348910			FALSE	Yes
cg08714510	1.47e-09	-----	1.76385e-06	2	106755481	UXS1;UXS1;UXS1;UXS1	TSS200;Body;Body;Body	FALSE	Yes
cg07448120	1.51e-09	-----	1.80575e-06	11	108004499	ACAT1	Body	FALSE	Yes
cg26747079	1.53e-09	+++++	1.82659e-06	3	193518745			FALSE	Yes
cg22256420	1.57e-09	-----	1.86494e-06	10	4060366			FALSE	Yes
cg14551458	1.58e-09	-----	1.87369e-06	5	123149103			FALSE	Yes
cg26416591	1.59e-09	-----	1.87927e-06	11	47790035	FNBP4	TSS1500	FALSE	Yes
cg09360036	1.6e-09	+++++	1.88795e-06	11	113932557	ZBTB16;ZBTB16	5'UTR;5'UTR	FALSE	Yes
cg16324526	1.63e-09	+++++	1.92016e-06	9	134459345	RAPGEF1;RAPGEF1;RAPGEF1	Body;Body;Body	FALSE	Yes
cg05307394	1.79e-09	-----	2.0982e-06	2	62611092			FALSE	Yes
cg26263915	1.87e-09	-----	2.18118e-06	9	138863166			FALSE	Yes
cg24306398	1.87e-09	-----	2.18118e-06	2	39445725	CDKL4	Body	FALSE	Yes
cg01944380	1.89e-09	-----	2.19729e-06	17	75388589	SEPT9;SEPT9;SEPT9;SEPT9;SEPT9;SEPT9	Body;5'UTR;Body;Body;5'UTR;Body	FALSE	Yes
cg01895164	1.89e-09	-----	2.19729e-06	1	26332153			FALSE	Yes
cg16941634	1.9e-09	-----	2.20531e-06	6	165985235	PDE10A;PDE10A	Body;Body	FALSE	Yes
cg03140410	1.98e-09	-----	2.28695e-06	17	30594811	RHBDL3	Body	FALSE	Yes
cg11591924	1.98e-09	-----	2.28695e-06	1	25327969			FALSE	Yes
cg13025388	1.99e-09	-----	2.29477e-06	11	118098752	MPZL3;MPZL3;MPZL3;MPZL3	3'UTR;3'UTR;Body;Body	FALSE	Yes
cg01094982	2.16e-09	-----	2.47474e-06	22	43401279	PACSIN2	5'UTR	FALSE	Yes
cg18963236	2.18e-09	-----	2.49363e-06	2	220325833	SPEG;SPEG	5'UTR;Body	FALSE	Yes
cg05752866	2.24e-09	-----	2.55814e-06	2	177423529			FALSE	Yes
cg22702259	2.32e-09	-----	2.64101e-06	17	38490520	RARA;RARA;RARA	Body;Body;Body	FALSE	Yes
cg08872577	2.32e-09	+++++	2.64101e-06	1	42385480	HIVEP3;HIVEP3;HIVEP3;HIVEP3	TSS1500;TSS1500;TSS1500;Body	FALSE	Yes
cg15482002	2.34e-09	-----	2.65952e-06	3	129323930	PLXND1	Body	FALSE	Yes
cg23883522	2.47e-09	+++++	2.78942e-06	21	45795579	TRPM2;TRPM2	Body;Body	FALSE	Yes
cg21323941	2.68e-09	+++++	3.01221e-06	4	36282300	DTHD1	TSS1500	FALSE	Yes
cg00260810	2.7e-09	-----	3.02989e-06	3	183894469	AP2M1;AP2M1	5'UTR;5'UTR	FALSE	Yes
cg00238470	2.85e-09	-----	3.18814e-06	1	36616845	TRAPPC3	5'UTR	FALSE	Yes
cg25991374	3.02e-09	+++++	3.35717e-06	1	178476197			FALSE	Yes
cg08434071	3.03e-09	-----	3.35777e-06	1	15485867	TMEM51;TMEM51;TMEM51;TMEM51	5'UTR;5'UTR;5'UTR;5'UTR	FALSE	Yes
cg14455466	3.08e-09	+++++	3.40257e-06	5	134895387			FALSE	Yes
cg00125205	3.08e-09	++-++	3.40257e-06	4	36282463	DTHD1	TSS1500	FALSE	Yes
cg17050747	3.13e-09	-----	3.44708e-06	5	89427766			FALSE	Yes
cg15160624	3.45e-09	-----	3.76448e-06	3	21793157	ZNF385D	TSS1500	FALSE	Yes
cg24688401	3.47e-09	-----	3.7805e-06	16	56311522	GNAO1;GNAO1	Body;Body	FALSE	Yes
cg17739573	3.51e-09	-----	3.81822e-06	4	74905354	CXCL3	TSS1500	FALSE	Yes
cg12464134	3.52e-09	-----	3.82324e-06	7	5578193			FALSE	Yes
cg26342454	3.66e-09	-----	3.96318e-06	4	10035262	SLC2A9	5'UTR	FALSE	Yes
cg24227782	3.68e-09	-----	3.97877e-06	6	111885923	TRAF3IP2-AS1;TRAF3IP2-AS1;TRAF3IP2-AS1;TRAF3IP2;TRAF3IP2;TRAF3IP2;TRAF3IP2	Body;Body;Body;Body;Body;Body;Body	FALSE	Yes
cg11830461	3.82e-09	-----	4.11761e-06	20	49039858			FALSE	Yes
cg08673945	3.84e-09	-----	4.13289e-06	9	20490677	MLLT3;MLLT3	Body;Body	FALSE	Yes
cg14549158	3.95e-09	-----	4.23205e-06	6	162521035	PARK2;PARK2;PARK2	Body;Body;Body	FALSE	Yes
cg01213463	4.11e-09	-----	4.37706e-06	19	32842514	ZNF507;ZNF507	5'UTR;5'UTR	FALSE	Yes
cg07489404	4.18e-09	+++++	4.42508e-06	5	94120935	MCTP1;MCTP1;MCTP1	Body;Body;Body	FALSE	Yes
cg11148327	4.21e-09	-----	4.44359e-06	6	11390130			FALSE	Yes
cg16720061	4.21e-09	-----	4.44359e-06	7	154990228			FALSE	Yes
cg06299644	4.44e-09	-----	4.67247e-06	2	54686203	SPTBN1	5'UTR	FALSE	Yes
cg04243090	4.54e-09	-----	4.76359e-06	1	208834795			FALSE	Yes
cg05466844	4.76e-09	---?-	4.97971e-06	15	91415964	FURIN;FURIN;FURIN	5'UTR;5'UTR;TSS200	FALSE	Yes
cg05207730	5.02e-09	+++++	5.24399e-06	11	116797991	SIK3;SIK3;SIK3	Body;Body;Body	FALSE	Yes
cg27022614	5.05e-09	-----	5.26758e-06	X	22341884	PTCHD1-AS	Body	FALSE	Yes
cg24667400	5.11e-09	+++++	5.31456e-06	6	122816886	PKIB;PKIB;PKIB	5'UTR;5'UTR;5'UTR	FALSE	Yes
cg09499939	5.15e-09	-----	5.34052e-06	19	16973595	SIN3B;SIN3B;SIN3B	Body;Body;TSS1500	FALSE	Yes
cg05940455	5.52e-09	-----	5.69925e-06	2	233265137			FALSE	Yes
cg10413305	5.61e-09	-----	5.78376e-06	11	122540748	UBASH3B	Body	FALSE	Yes
cg08792700	5.66e-09	-----	5.82686e-06	9	86911279	SLC28A3;SLC28A3;SLC28A3	Body;Body;Body	FALSE	Yes
cg21702517	5.75e-09	-----	5.9024e-06	18	30133400			FALSE	Yes
cg10217853	5.8e-09	-----	5.94513e-06	15	98505199	ARRDC4	Body	FALSE	Yes
cg05198378	6.03e-09	-----	6.1631e-06	5	82104885			FALSE	Yes
cg16176702	6.11e-09	+++++	6.22695e-06	15	66307282	MEGF11	Body	FALSE	Yes
cg09609957	6.37e-09	-----	6.4641e-06	14	91711676	GPR68;GPR68	TSS1500;5'UTR	FALSE	Yes
cg20433154	6.38e-09	+++++	6.46502e-06	5	325118	AHRR;AHRR	Body;Body	FALSE	Yes
cg18844158	6.42e-09	-----	6.49628e-06	1	156096574	LMNA;LMNA;LMNA;LMNA;LMNA;LMNA;LMNA	5'UTR;Body;Body;Body;Body;Body;Body	FALSE	Yes
cg19373778	6.47e-09	-----	6.53756e-06	1	9354516	SPSB1	5'UTR	FALSE	Yes
cg10143064	6.49e-09	+++++	6.54846e-06	17	72804065	TMEM104	Body	FALSE	Yes
cg26882556	6.58e-09	-----	6.62985e-06	8	29360758			FALSE	Yes
cg02497737	6.71e-09	+++++	6.74171e-06	15	84595079	ADAMTSL3;ADAMTSL3	Body;Body	FALSE	Yes
cg09098393	6.78e-09	-----	6.80242e-06	8	55423202			FALSE	Yes
cg16712581	6.86e-09	+++++	6.85364e-06	4	89526335	HERC3;HERC3	5'UTR;5'UTR	FALSE	Yes
cg07714426	6.89e-09	+++++	6.87395e-06	9	14108179	NFIB;NFIB;NFIB;NFIB	Body;Body;Body;Body	FALSE	Yes
cg16895116	7.09e-09	-----	7.0438e-06	1	20479470			FALSE	Yes
cg03052614	7.13e-09	+++++	7.07365e-06	17	17410416	PEMT;PEMT;PEMT;PEMT;PEMT	Body;Body;Body;Body;Body	FALSE	Yes
cg12441500	7.29e-09	-----	7.21224e-06	16	12207676	SNX29	Body	FALSE	Yes
cg12466556	7.36e-09	+++++	7.26104e-06	22	30443509	HORMAD2-AS1	Body	FALSE	Yes
cg13784607	7.37e-09	-----	7.26104e-06	11	47546214	CELF1;CELF1	5'UTR;TSS1500	FALSE	Yes
cg13433259	7.45e-09	-----	7.31956e-06	6	11237041	NEDD9;NEDD9	Body;Body	FALSE	Yes
cg15415882	7.74e-09	-----	7.56264e-06	3	194925340	XXYLT1;XXYLT1	Body;Body	FALSE	Yes
cg03461577	7.79e-09	-----	7.60104e-06	11	33901166	LMO2	5'UTR	FALSE	Yes
cg02095838	7.97e-09	----?	7.74476e-06	7	110651934	IMMP2L;IMMP2L	Body;Body	FALSE	Yes
cg14471778	8.02e-09	+++++	7.7827e-06	12	11113068	PRH1-PRR4;PRH1;PRH1	Body;Body;5'UTR	FALSE	Yes
cg23954423	8.11e-09	-----	7.8593e-06	6	46291216	RCAN2;RCAN2;RCAN2;LOC101926915	Body;Body;Body;Body	FALSE	Yes
cg21380990	8.32e-09	-----	8.05182e-06	22	43403980	PACSIN2	5'UTR	FALSE	Yes
cg09303399	8.36e-09	-----	8.06593e-06	14	106330947			FALSE	Yes
cg04369835	8.38e-09	+++?+	8.06593e-06	5	322705	AHRR;AHRR	Body;Body	FALSE	Yes
cg10068045	8.64e-09	-----	8.29371e-06	19	2291785	LINGO3	5'UTR	FALSE	Yes
cg21804649	8.72e-09	----?	8.35921e-06	1	171847010	DNM3;DNM3;DNM3	Body;Body;Body	FALSE	Yes
cg16565224	8.82e-09	-----	8.43231e-06	6	11411456			FALSE	Yes
cg25984701	9.21e-09	+++-+	8.79333e-06	13	52006860	INTS6;INTS6;INTS6	Body;Body;5'UTR	FALSE	Yes
cg01435315	9.37e-09	-----	8.92211e-06	10	72348420			FALSE	Yes
cg25037104	9.61e-09	+++++	9.12617e-06	3	188510700	LPP;LPP;LPP	Body;Body;Body	FALSE	Yes
cg21915904	1e-08	-----	9.42097e-06	17	2829770	RAP1GAP2;RAP1GAP2	Body;Body	FALSE	Yes
cg05465666	1.03e-08	-----	9.66514e-06	1	150244765	C1orf54;C1orf54;C1orf54;C1orf54;C1orf54;C1orf54;C1orf54	TSS1500;TSS1500;TSS1500;1stExon;1stExon;5'UTR;5'UTR	FALSE	Yes
cg00232091	1.05e-08	----?	9.82685e-06	20	43182352	PKIG;PKIG;PKIG;PKIG	5'UTR;5'UTR;5'UTR;5'UTR	FALSE	Yes
cg02141604	1.05e-08	-----	9.82685e-06	3	52058921			FALSE	Yes
cg06517956	1.06e-08	+++++	9.89437e-06	7	105383652	ATXN7L1	Body	FALSE	Yes
cg05704547	1.06e-08	+++++	9.89437e-06	3	60067722	FHIT;FHIT	Body;Body	FALSE	Yes
cg08565469	1.07e-08	-----	9.93549e-06	19	2291389	LINGO3	Body	FALSE	Yes
cg03757296	1.07e-08	-----	9.93549e-06	6	47121238			FALSE	Yes
cg06062640	1.07e-08	-----	9.93549e-06	20	52272952			FALSE	Yes
cg26942477	1.07e-08	-----	9.93549e-06	2	173984917	ZAK;ZAK	Body;Body	FALSE	Yes
cg15133043	1.08e-08	+++++	1.00153e-05	17	29405668			FALSE	Yes
cg15653143	1.09e-08	-----	1.00948e-05	11	60822690			FALSE	Yes
cg00717494	1.12e-08	-----	1.03457e-05	2	129202877			FALSE	Yes
cg05663968	1.12e-08	+++++	1.03457e-05	16	292215	ITFG3;ITFG3;ITFG3	5'UTR;5'UTR;Body	FALSE	Yes
cg06119833	1.17e-08	-----	1.07935e-05	14	101692579			FALSE	Yes
cg23535194	1.2e-08	-----	1.10273e-05	8	29266207			FALSE	Yes
cg10582712	1.21e-08	-----	1.11048e-05	1	17767282	RCC2	TSS1500	FALSE	Yes
cg22486366	1.25e-08	-----	1.14276e-05	1	20479732			FALSE	Yes
cg04002038	1.25e-08	+?+++	1.14276e-05	4	56097	ZNF718;ZNF595;ZNF595;ZNF595;ZNF595;ZNF718;ZNF718	TSS1500;5'UTR;5'UTR;Body;Body;Body;Body	FALSE	Yes
cg08331284	1.28e-08	-----	1.16569e-05	10	80841582	ZMIZ1	5'UTR	FALSE	Yes
cg15434733	1.3e-08	-----	1.17937e-05	22	31683813	PIK3IP1;PIK3IP1	Body;Body	FALSE	Yes
cg22140618	1.3e-08	-----	1.17937e-05	7	139742416	PARP12;PARP12	Body;Body	FALSE	Yes
cg10816539	1.31e-08	-----	1.18692e-05	3	56834848	ARHGEF3;ARHGEF3;ARHGEF3	Body;Body;Body	FALSE	Yes
cg09251068	1.32e-08	-----	1.18991e-05	7	117421001	CTTNBP2	Body	FALSE	Yes
cg11683390	1.32e-08	-----	1.18991e-05	1	25361490			FALSE	Yes
cg08025679	1.32e-08	-----	1.18991e-05	19	30157311	PLEKHF1	5'UTR	FALSE	Yes
cg06671242	1.32e-08	++-++	1.18991e-05	11	86527767	PRSS23;PRSS23;PRSS23	Body;Body;Body	FALSE	Yes
cg09511513	1.35e-08	-----	1.21387e-05	8	20060014	ATP6V1B2	Body	FALSE	Yes
cg01821920	1.36e-08	-----	1.22132e-05	1	6015903	NPHP4;NPHP4;NPHP4;NPHP4	Body;Body;5'UTR;5'UTR	FALSE	Yes
cg08343624	1.4e-08	-----	1.25249e-05	17	79364211			FALSE	Yes
cg17381396	1.41e-08	+++++	1.25827e-05	1	10527895	DFFA;DFFA	Body;Body	FALSE	Yes
cg21619827	1.41e-08	+++++	1.25827e-05	8	77528430	ZFHX4-AS1	Body	FALSE	Yes
cg11225759	1.45e-08	-----	1.29234e-05	15	92614493	SLCO3A1;SLCO3A1	Body;Body	FALSE	Yes
cg25331593	1.57e-08	-----	1.39404e-05	9	140197800	NRARP	TSS1500	FALSE	Yes
cg05816188	1.59e-08	-----	1.40828e-05	4	100274232	ADH1C	TSS200	FALSE	Yes
cg08282118	1.6e-08	-----	1.41537e-05	17	38480483	RARA;RARA;RARA	5'UTR;5'UTR;5'UTR	FALSE	Yes
cg05720640	1.62e-08	-----	1.42951e-05	10	18689948	CACNB2;CACNB2;CACNB2;CACNB2;CACNB2;CACNB2;CACNB2;CACNB2;CACNB2;CACNB2	5'UTR;1stExon;Body;Body;Body;Body;Body;Body;Body;Body	FALSE	Yes
cg25661658	1.63e-08	-----	1.43477e-05	20	31560889			FALSE	Yes
cg18581607	1.63e-08	+++++	1.43477e-05	17	4714084	PLD2;PLD2;PLD2;PLD2	ExonBnd;ExonBnd;Body;Body	FALSE	Yes
cg03764753	1.65e-08	-----	1.45057e-05	2	152163155			FALSE	Yes
cg25964299	1.74e-08	+++++	1.52216e-05	1	15508314	TMEM51;TMEM51;TMEM51;TMEM51	5'UTR;5'UTR;5'UTR;5'UTR	FALSE	Yes
cg06341867	1.77e-08	-----	1.5446e-05	1	180208880	LHX4	Body	FALSE	Yes
cg18522582	1.79e-08	-----	1.55632e-05	2	223915743	KCNE4	TSS1500	FALSE	Yes
cg01388711	1.79e-08	-----	1.55632e-05	9	130769758			FALSE	Yes
cg12560431	1.85e-08	-----	1.60456e-05	3	12219504	SYN2;SYN2	Body;Body	FALSE	Yes
cg26992381	1.87e-08	-----	1.61795e-05	3	71478152	FOXP1;FOXP1;FOXP1;FOXP1;FOXP1	5'UTR;5'UTR;5'UTR;5'UTR;5'UTR	FALSE	Yes
cg10719303	1.89e-08	+++++	1.63327e-05	21	46513297	ADARB1;ADARB1;ADARB1;ADARB1;ADARB1;ADARB1;ADARB1;ADARB1	5'UTR;5'UTR;5'UTR;5'UTR;Body;Body;Body;Body	FALSE	Yes
cg02078001	1.95e-08	-----	1.68103e-05	2	106755680	UXS1;UXS1;UXS1;UXS1	TSS1500;Body;Body;Body	FALSE	Yes
cg04061293	2.04e-08	----?	1.75223e-05	12	90341279			FALSE	Yes
cg06047127	2.05e-08	+++++	1.75869e-05	7	110163024			FALSE	Yes
cg21404557	2.09e-08	+++++	1.79085e-05	12	94493711			FALSE	Yes
cg07330742	2.1e-08	-----	1.79509e-05	10	80889044	ZMIZ1	5'UTR	FALSE	Yes
cg10189850	2.1e-08	+++++	1.79509e-05	5	6366345			FALSE	Yes
cg07893565	2.13e-08	+++++	1.81854e-05	4	84218838	HPSE;HPSE;HPSE;HPSE	Body;Body;Body;Body	FALSE	Yes
cg05218021	2.17e-08	+++++	1.85047e-05	1	38580101			FALSE	Yes
cg06555319	2.2e-08	+++++	1.87156e-05	5	1408879	SLC6A3	Body	FALSE	Yes
cg11334300	2.24e-08	+++++	1.89876e-05	13	114152914	TMCO3	Body	FALSE	Yes
cg22721423	2.25e-08	-----	1.90497e-05	14	74229364	ELMSAN1	5'UTR	FALSE	Yes
cg00162361	2.27e-08	-----	1.91961e-05	10	80848009	ZMIZ1	5'UTR	FALSE	Yes
cg12144393	2.28e-08	-----	1.92349e-05	11	117480983	DSCAML1	Body	FALSE	Yes
cg19563250	2.28e-08	-----	1.92349e-05	7	110669913	IMMP2L;IMMP2L	Body;Body	FALSE	Yes
cg23900763	2.31e-08	-----	1.94188e-05	11	250924	PSMD13;PSMD13	Body;Body	FALSE	Yes
cg12378834	2.36e-08	-----	1.98157e-05	5	134646487	C5orf66	5'UTR	FALSE	Yes
cg22473125	2.4e-08	-----	2.01277e-05	1	90097907	LRRC8C;FLJ27354	TSS1500;Body	FALSE	Yes
cg14689167	2.45e-08	-----	2.05228e-05	10	4309215			FALSE	Yes
cg12832157	2.47e-08	-----	2.0666e-05	3	4885491	ITPR1;ITPR1;ITPR1	Body;Body;Body	FALSE	Yes
cg26125361	2.48e-08	----?	2.07252e-05	20	189957			FALSE	Yes
cg02986585	2.51e-08	-----	2.09513e-05	6	41546546	FOXP4;FOXP4;FOXP4	Body;Body;Body	FALSE	Yes
cg24843790	2.53e-08	-----	2.10935e-05	21	44727494			FALSE	Yes
cg11116464	2.59e-08	+++++	2.15179e-05	1	8651231	RERE;RERE	Body;Body	FALSE	Yes
cg19758958	2.6e-08	-----	2.15758e-05	11	62319222			FALSE	Yes
cg24587305	2.63e-08	-----	2.17739e-05	9	38026422	SHB	Body	FALSE	Yes
cg09040301	2.66e-08	-----	2.19455e-05	13	49107519	RCBTB2;RCBTB2;RCBTB2;RCBTB2	TSS200;TSS200;TSS200;TSS200	FALSE	Yes
cg15581007	2.66e-08	+++++	2.19455e-05	5	53520049	ARL15	Body	FALSE	Yes
cg04350530	2.69e-08	+++++	2.21416e-05	4	140728329	MAML3	Body	FALSE	Yes
cg12053816	2.71e-08	-----	2.22804e-05	10	79034490	KCNMA1;KCNMA1;KCNMA1;KCNMA1;KCNMA1;KCNMA1	Body;Body;Body;Body;Body;Body	FALSE	Yes
cg17684034	2.73e-08	-----	2.24189e-05	5	74862658	POLK	Body	FALSE	Yes
cg22786718	2.79e-08	+++++	2.28587e-05	20	2511199			FALSE	Yes
cg04010861	2.83e-08	-----	2.31597e-05	4	8349838			FALSE	Yes
cg13505271	2.85e-08	+++++	2.32966e-05	14	105721466	BRF1;BRF1;BRF1;BRF1	Body;Body;Body;Body	FALSE	Yes
cg02860470	2.89e-08	+++++	2.35964e-05	6	75649222			FALSE	Yes
cg22976567	2.93e-08	-----	2.38135e-05	1	156074182	LMNA	5'UTR	FALSE	Yes
cg24467989	3e-08	-----	2.43545e-05	13	41560747	ELF1	5'UTR	FALSE	Yes
cg01969278	3.07e-08	-----	2.48377e-05	10	63808948	ARID5B;ARID5B	TSS200;Body	FALSE	Yes
cg09956442	3.12e-08	-----	2.51848e-05	19	18133156			FALSE	Yes
cg03816583	3.14e-08	+++++	2.53175e-05	3	153942348	ARHGEF26;ARHGEF26;ARHGEF26	Body;Body;Body	FALSE	Yes
cg18982976	3.29e-08	+++++	2.63772e-05	17	61116857	TANC2;MIR548W	Body;Body	FALSE	Yes
cg02772754	3.48e-08	-----	2.77751e-05	22	20918630	MED15;MED15;MED15;MED15;MED15;MED15	Body;Body;Body;Body;Body;Body	FALSE	Yes
cg23248055	3.56e-08	+++++	2.83182e-05	4	56185	ZNF718;ZNF595;ZNF595;ZNF595;ZNF595;ZNF718;ZNF718	TSS1500;5'UTR;5'UTR;Body;Body;Body;Body	FALSE	Yes
cg26539571	3.57e-08	-----	2.8366e-05	6	16731770	ATXN1;ATXN1	5'UTR;5'UTR	FALSE	Yes
cg01293296	3.79e-08	+++++	2.98469e-05	3	135790100	PPP2R3A;PPP2R3A;PPP2R3A	Body;Body;Body	FALSE	Yes
cg02734052	3.91e-08	+++++	3.07578e-05	14	22944645			FALSE	Yes
cg17415117	4.01e-08	-----	3.144e-05	20	43293462	LINC01260	Body	FALSE	Yes
cg08375515	4.08e-08	-----	3.19536e-05	17	12694121	LOC100128006;ARHGAP44	TSS1500;Body	FALSE	Yes
cg13753585	4.14e-08	----?	3.23522e-05	12	54677175	HNRNPA1P10;HNRNPA1;HNRNPA1	Body;Body;Body	FALSE	Yes
cg12549632	4.15e-08	+++++	3.23947e-05	16	27741322	KIAA0556	Body	FALSE	Yes
cg14793944	4.38e-08	+++++	3.40777e-05	15	39720155			FALSE	Yes
cg23196251	4.41e-08	-----	3.42736e-05	2	39348582	SOS1	TSS1500	FALSE	Yes
cg19616007	4.57e-08	-----	3.52854e-05	3	98272602			FALSE	Yes
cg18007737	4.61e-08	-----	3.55556e-05	2	233265159			FALSE	Yes
cg09764276	4.68e-08	-----	3.60173e-05	1	9142159			FALSE	Yes
cg00699559	4.68e-08	+++++	3.60173e-05	5	419712	AHRR;AHRR	Body;Body	FALSE	Yes
cg11307857	4.78e-08	+++++	3.66677e-05	11	128599031	FLI1;FLI1;FLI1;FLI1	5'UTR;5'UTR;5'UTR;Body	FALSE	Yes
cg07787313	4.92e-08	-----	3.76603e-05	4	109087499	LEF1-AS1;LEF1;LEF1;LEF1;LEF1;LEF1	TSS1500;1stExon;5'UTR;Body;Body;Body	FALSE	Yes
cg02340116	5.08e-08	+++++	3.88432e-05	8	54089593			FALSE	Yes
cg13734658	5.31e-08	-----	4.04278e-05	17	71479021	SDK2	Body	FALSE	Yes
cg08946781	5.37e-08	+++++	4.08408e-05	17	38732694			FALSE	Yes
cg17591799	5.4e-08	-----	4.09812e-05	22	33238802	TIMP3;SYN3;SYN3;SYN3	Body;Body;Body;Body	FALSE	Yes
cg21304569	5.4e-08	+++++	4.09812e-05	14	76299369	TTLL5	Body	FALSE	Yes
cg09431774	5.47e-08	-----	4.13358e-05	22	25465561	KIAA1671	Body	FALSE	Yes
cg14711927	5.61e-08	-----	4.23037e-05	2	70369031			FALSE	Yes
cg11459681	5.76e-08	-----	4.3297e-05	11	102322110	TMEM123	Body	FALSE	Yes
cg14595618	6.09e-08	+++++	4.55634e-05	10	71135446	HK1;HK1;HK1;HK1;HK1	Body;Body;Body;Body;Body	FALSE	Yes
cg16108246	6.1e-08	-----	4.55634e-05	10	18689556	CACNB2;CACNB2;CACNB2;CACNB2;CACNB2;CACNB2;CACNB2;CACNB2;CACNB2;CACNB2	5'UTR;1stExon;Body;Body;Body;Body;Body;Body;Body;Body	FALSE	Yes
cg14372879	6.1e-08	-----	4.55634e-05	1	192493801			FALSE	Yes
cg27086356	6.11e-08	+++++	4.55902e-05	3	170627562	EIF5A2	TSS1500	FALSE	Yes
cg00021764	6.4e-08	-----	4.7604e-05	10	121262234	RGS10;RGS10	Body;Body	FALSE	Yes
cg20956829	6.46e-08	-----	4.8e-05	11	118112309	MPZL3;MPZL3;MPZL3;MPZL3	Body;Body;Body;Body	FALSE	Yes
cg02841972	6.51e-08	-----	4.8321e-05	2	10176151			FALSE	Yes
cg05371159	6.58e-08	+++++	4.87896e-05	9	94342441			FALSE	Yes
cg13240333	6.62e-08	+++++	4.89839e-05	8	77528456	ZFHX4-AS1	Body	FALSE	Yes
cg07830813	6.64e-08	+++++	4.90808e-05	15	45630898			FALSE	Yes
cg26671440	6.67e-08	+++++	4.92002e-05	19	36542325	THAP8	Body	FALSE	Yes
cg05620847	6.67e-08	+++++	4.92002e-05	6	90695223	BACH2;BACH2	Body;Body	FALSE	Yes
cg11581285	6.79e-08	-----	4.99815e-05	11	33901181	LMO2	5'UTR	FALSE	Yes
cg03874689	6.82e-08	+++++	5.00985e-05	17	55801597			FALSE	Yes
cg10560497	6.84e-08	-----	5.01935e-05	16	27389665			FALSE	Yes
cg27173749	6.99e-08	-----	5.10307e-05	15	58506426			FALSE	Yes
cg25422959	6.99e-08	+++++	5.10307e-05	2	24234549	MFSD2B	Body	FALSE	Yes
cg19604806	7.02e-08	-----	5.11971e-05	10	115223690			FALSE	Yes
cg02195564	7.27e-08	-----	5.28575e-05	8	29611036	LOC101929450;LOC101929450	Body;Body	FALSE	Yes
cg14227037	7.32e-08	-----	5.31666e-05	8	8864470	ERI1	Body	FALSE	Yes
cg22200352	7.35e-08	+++-+	5.333e-05	1	70826136	HHLA3;HHLA3;HHLA3;HHLA3	Body;Body;Body;Body	FALSE	Yes
cg17281126	7.39e-08	-----	5.35109e-05	10	104953409	NT5C2;NT5C2	TSS1500;TSS1500	FALSE	Yes
cg00379830	7.39e-08	-----	5.35109e-05	16	3137338			FALSE	Yes
cg03499829	7.46e-08	+++++	5.39628e-05	3	197171205			FALSE	Yes
cg27481074	7.58e-08	-----	5.4775e-05	14	106351316			FALSE	Yes
cg13474790	7.63e-08	+++++	5.49129e-05	12	69166745			FALSE	Yes
cg17769389	7.79e-08	+++++	5.60077e-05	22	36480060			FALSE	Yes
cg05184874	7.83e-08	+++++	5.62383e-05	15	59816715			FALSE	Yes
cg08373547	7.98e-08	-----	5.72e-05	14	52794541	PTGER2	3'UTR	FALSE	Yes
cg26138250	8.02e-08	+++++	5.74288e-05	17	74244687			FALSE	Yes
cg17307655	8.14e-08	+++++	5.82294e-05	9	117214672	DFNB31;DFNB31;DFNB31	5'UTR;Body;Body	FALSE	Yes
cg12338887	8.46e-08	-----	6.03362e-05	6	106542466	PRDM1	Body	FALSE	Yes
cg05467090	8.54e-08	-----	6.07238e-05	4	97329229			FALSE	Yes
cg03244470	8.56e-08	+++++	6.07444e-05	19	42538971	GRIK5;GRIK5	Body;Body	FALSE	Yes
cg16385627	8.63e-08	-----	6.11801e-05	12	120665954	PXN;PXN;PXN;PXN	Body;Body;Body;5'UTR	FALSE	Yes
cg09948374	8.66e-08	+++++	6.12704e-05	1	174844517	RABGAP1L;RABGAP1L;RABGAP1L;RABGAP1L	5'UTR;TSS200;Body;Body	FALSE	Yes
cg12117654	8.78e-08	+++++	6.1996e-05	22	37772106	ELFN2;ELFN2	5'UTR;Body	FALSE	Yes
cg13155039	8.86e-08	+++++	6.24987e-05	1	236118040			FALSE	Yes
cg06647533	9.32e-08	+++++	6.54835e-05	6	29478254			FALSE	Yes
cg22121323	9.65e-08	-----	6.76715e-05	21	47480909			FALSE	Yes
cg15471525	9.7e-08	-----	6.78848e-05	14	100540450	EVL	Body	FALSE	Yes
cg18638857	9.74e-08	-----	6.80307e-05	20	45981324	ZMYND8;ZMYND8;ZMYND8;ZMYND8;ZMYND8;ZMYND8;ZMYND8;ZMYND8;ZMYND8;ZMYND8;ZMYND8;ZMYND8;ZMYND8;ZMYND8;ZMYND8;ZMYND8;ZMYND8;ZMYND8	5'UTR;5'UTR;5'UTR;5'UTR;5'UTR;Body;Body;Body;Body;Body;Body;Body;Body;Body;Body;Body;Body;Body	FALSE	Yes
cg23660404	9.78e-08	-----	6.8243e-05	8	55240982			FALSE	Yes
cg13098984	9.87e-08	+++++	6.88034e-05	11	12090750			FALSE	Yes
cg19197158	9.93e-08	+++++	6.91538e-05	12	116498620	MED13L	Body	FALSE	Yes
cg00656630	1.01e-07	-----	7.01314e-05	2	121012023	RALB	5'UTR	FALSE	Yes
cg00637837	1.01e-07	-----	7.01314e-05	1	61163218	LOC101926964	Body	FALSE	Yes
cg16033864	1.03e-07	-----	7.09652e-05	21	16494077			FALSE	Yes
cg06991118	1.04e-07	-----	7.14463e-05	18	9117348	NDUFV2	Body	FALSE	Yes
cg11422009	1.04e-07	+++++	7.14463e-05	17	17321762			FALSE	Yes
cg26570257	1.05e-07	-----	7.20636e-05	1	223404230	SUSD4	Body	FALSE	Yes
cg17149935	1.07e-07	+++++	7.3224e-05	18	52538562	RAB27B	5'UTR	FALSE	Yes
cg08542560	1.08e-07	-----	7.38372e-05	5	14671841	OTULIN	Body	FALSE	Yes
cg23023797	1.09e-07	-----	7.43777e-05	20	61282847	SLCO4A1	5'UTR	FALSE	Yes
cg25094008	1.12e-07	-----	7.59868e-05	1	28501825	PTAFR;PTAFR;PTAFR;PTAFR	5'UTR;5'UTR;5'UTR;5'UTR	FALSE	Yes
cg08428972	1.12e-07	-----	7.59868e-05	19	18133184			FALSE	Yes
cg24252430	1.14e-07	+++++	7.72699e-05	6	14229086			FALSE	Yes
cg19541622	1.16e-07	+++++	7.85506e-05	4	56180	ZNF718;ZNF595;ZNF595;ZNF595;ZNF595;ZNF718;ZNF718	TSS1500;5'UTR;5'UTR;Body;Body;Body;Body	FALSE	Yes
cg23362622	1.2e-07	-----	8.09505e-05	7	107027654	COG5;COG5;COG5	Body;Body;Body	FALSE	Yes
cg22995183	1.2e-07	+++++	8.09505e-05	16	14293184	MKL2;MKL2	Body;Body	FALSE	Yes
cg01559644	1.23e-07	-----	8.28956e-05	1	178157646	RASAL2	Body	FALSE	Yes
cg17551764	1.24e-07	-----	8.34903e-05	14	106350689			FALSE	Yes
cg27312987	1.27e-07	-----	8.51069e-05	3	52738881	GLT8D1;SPCS1;GLT8D1;GLT8D1;GLT8D1;GLT8D1	TSS1500;TSS1500;5'UTR;5'UTR;5'UTR;5'UTR	FALSE	Yes
cg15026637	1.27e-07	+++++	8.51069e-05	12	43295760			FALSE	Yes
cg09641518	1.28e-07	-----	8.55349e-05	4	143325397	INPP4B;INPP4B	Body;Body	FALSE	Yes
cg18167858	1.28e-07	-----	8.55349e-05	13	100120046			FALSE	Yes
cg09586300	1.28e-07	+++++	8.55349e-05	12	18129330			FALSE	Yes
cg26485048	1.32e-07	+++++	8.79597e-05	7	7951246			FALSE	Yes
cg18404213	1.35e-07	-----	8.96225e-05	10	104563029	WBP1L;WBP1L	Body;Body	FALSE	Yes
cg24330553	1.35e-07	+++++	8.96225e-05	13	112114082			FALSE	Yes
cg04273904	1.38e-07	-----	9.1188e-05	4	186655783	SORBS2;SORBS2;SORBS2;SORBS2;SORBS2;SORBS2;SORBS2	5'UTR;5'UTR;5'UTR;5'UTR;5'UTR;5'UTR;5'UTR	FALSE	Yes
cg22055479	1.38e-07	+++++	9.1188e-05	7	110082468			FALSE	Yes
cg01462343	1.4e-07	-----	9.23377e-05	6	90847416	BACH2;BACH2	5'UTR;5'UTR	FALSE	Yes
cg13541087	1.4e-07	+++++	9.23377e-05	6	7224968	RREB1;RREB1;RREB1;RREB1	Body;Body;Body;Body	FALSE	Yes
cg03479985	1.43e-07	+++++	9.39674e-05	8	20830141	LOC286114	TSS1500	FALSE	Yes
cg20450889	1.44e-07	+++++	9.43626e-05	14	97043565			FALSE	Yes
cg14875032	1.45e-07	-----	9.45817e-05	7	139742342	PARP12;PARP12	Body;Body	FALSE	Yes
cg10799388	1.45e-07	-----	9.45817e-05	16	733709	JMJD8	Body	FALSE	Yes
cg13785019	1.45e-07	++-++	9.45817e-05	11	9365716			FALSE	Yes
cg15721757	1.46e-07	-----	9.50594e-05	3	184186357			FALSE	Yes
cg17786281	1.47e-07	-----	9.55353e-05	19	45228524			FALSE	Yes
cg18410341	1.47e-07	-----	9.55353e-05	3	72360163			FALSE	Yes
cg01248108	1.48e-07	+++++	9.60973e-05	7	114619572	MDFIC;MDFIC;MDFIC;MDFIC	ExonBnd;ExonBnd;Body;Body	FALSE	Yes
cg02688432	1.5e-07	-----	9.7307e-05	1	91970745	CDC7;CDC7;CDC7	Body;Body;Body	FALSE	Yes
cg18567079	1.51e-07	+++++	9.77771e-05	2	47039888			FALSE	Yes
cg24425745	1.53e-07	+++++	9.87122e-05	3	185743062			FALSE	Yes
cg26306522	1.58e-07	-----	0.000101661	16	30467696			FALSE	Yes
cg12159583	1.59e-07	+++++	0.000102212	9	134532611	RAPGEF1;RAPGEF1;RAPGEF1	Body;Body;Body	FALSE	Yes
cg03936075	1.6e-07	-----	0.000102669	6	11370479	NEDD9;NEDD9	5'UTR;Body	FALSE	Yes
cg02000109	1.61e-07	-----	0.000103217	20	36986320	LBP	Body	FALSE	Yes
cg17567300	1.63e-07	-----	0.000104311	2	208014624	KLF7;KLF7;KLF7;KLF7	Body;Body;Body;Body	FALSE	Yes
cg22124000	1.64e-07	-----	0.000104763	11	105115332			FALSE	Yes
cg03560743	1.64e-07	+++++	0.000104763	17	54758934			FALSE	Yes
cg12734136	1.65e-07	-----	0.000105118	14	106331073			FALSE	Yes
cg04277040	1.68e-07	-----	0.000106646	16	80603851	LINC01227;LINC01227	Body;TSS1500	FALSE	Yes
cg04942605	1.68e-07	-----	0.000106646	22	37699966	CYTH4	Body	FALSE	Yes
cg20346774	1.68e-07	+++++	0.000106646	15	59436893	MYO1E	Body	FALSE	Yes
cg22616379	1.69e-07	+++++	0.00010709	20	62367648	LIME1;LIME1;LIME1	5'UTR;TSS200;TSS200	FALSE	Yes
cg25419384	1.7e-07	-----	0.000107436	1	12239393	TNFRSF1B	Body	FALSE	Yes
cg24180723	1.7e-07	-++++	0.000107436	2	205954921	PARD3B;PARD3B;PARD3B;PARD3B	Body;Body;Body;Body	FALSE	Yes
cg17250680	1.72e-07	+++++	0.000108411	2	227846651	RHBDD1;RHBDD1	Body;Body	FALSE	Yes
cg09589067	1.76e-07	+++++	0.000110344	17	55596159	MSI2;MSI2	Body;Body	FALSE	Yes
cg02540203	1.79e-07	+++++	0.000112027	1	7632747	CAMTA1	Body	FALSE	Yes
cg26161151	1.81e-07	-----	0.00011298	14	106354549			FALSE	Yes
cg11742305	1.81e-07	-----	0.00011298	6	168232436	MLLT4;MLLT4;MLLT4	5'UTR;Body;Body	FALSE	Yes
cg03778809	1.81e-07	+++++	0.00011298	8	1721237	CLN8	Body	FALSE	Yes
cg15431537	1.82e-07	+++++	0.000113505	6	41736916			FALSE	Yes
cg06508056	1.85e-07	+++++	0.000114972	7	146594213	CNTNAP2	Body	FALSE	Yes
cg03850585	1.87e-07	+++++	0.000116012	13	51101640	DLEU1-AS1;DLEU1	TSS200;Body	FALSE	Yes
cg11090631	1.89e-07	+++-+	0.000117048	1	157144014			FALSE	Yes
cg23212050	1.9e-07	-----	0.000117463	1	9450158			FALSE	Yes
cg12053348	1.92e-07	-----	0.000118493	3	72536534			FALSE	Yes
cg27339954	1.92e-07	+++++	0.000118493	11	120106999	POU2F3	TSS1500	FALSE	Yes
cg24338141	1.97e-07	-----	0.000121158	5	156599642			FALSE	Yes
cg10461390	1.98e-07	+++++	0.000121457	4	151324223	LRBA;LRBA	Body;Body	FALSE	Yes
cg03221779	1.98e-07	+++++	0.000121457	14	99897083	SETD3;SETD3	Body;Body	FALSE	Yes
cg20574434	1.99e-07	-----	0.000121965	12	57024673	BAZ2A;BAZ2A	TSS1500;Body	FALSE	Yes
cg17157422	2e-07	-----	0.000122367	12	2356678	CACNA1C;CACNA1C;CACNA1C;CACNA1C;CACNA1C;CACNA1C;CACNA1C;CACNA1C;CACNA1C;CACNA1C;CACNA1C;CACNA1C;CACNA1C;CACNA1C;CACNA1C;CACNA1C;CACNA1C;CACNA1C;CACNA1C;CACNA1C;CACNA1C;CACNA1C;CACNA1C	Body;Body;Body;Body;Body;Body;Body;Body;Body;Body;Body;Body;Body;Body;Body;Body;Body;Body;Body;Body;Body;Body;Body	FALSE	Yes
cg01892389	2e-07	+++++	0.000122367	6	158448301	SYNJ2;SYNJ2	5'UTR;Body	FALSE	Yes
cg07567589	2.04e-07	-----	0.0001246	20	46130154	NCOA3;NCOA3;NCOA3;NCOA3	TSS1500;TSS1500;TSS1500;TSS1500	FALSE	Yes
cg23006541	2.04e-07	--+--	0.0001246	11	68075647			FALSE	Yes
cg15673843	2.06e-07	+++++	0.000125498	19	4990502	KDM4B	5'UTR	FALSE	Yes
cg23004006	2.08e-07	-----	0.000126391	16	81664541	CMIP;CMIP	Body;Body	FALSE	Yes
cg14634473	2.12e-07	-----	0.000128601	10	23105437			FALSE	Yes
cg14645994	2.12e-07	+++++	0.000128601	6	56521080	RNU6-71P;DST;DST;DST	Body;Body;Body;Body	FALSE	Yes
cg23132195	2.15e-07	-----	0.00013031	4	6033466	JAKMIP1	Body	FALSE	Yes
cg04376114	2.18e-07	-----	0.000131679	8	74375265	STAU2;STAU2;STAU2;STAU2	Body;Body;Body;Body	FALSE	Yes
cg16267679	2.19e-07	-----	0.000132058	2	145278615	LINC01412;ZEB2;ZEB2;ZEB2	TSS1500;TSS1500;TSS1500;TSS1500	FALSE	Yes
cg22475217	2.22e-07	-----	0.000133754	19	14495378	ADGRE5;ADGRE5;ADGRE5	Body;Body;Body	FALSE	Yes
cg13251913	2.25e-07	+++++	0.000135217	16	57673268	ADGRG1;ADGRG1;ADGRG1;ADGRG1;ADGRG1;ADGRG1;ADGRG1;ADGRG1;ADGRG1;ADGRG1;ADGRG1;ADGRG1;ADGRG1	1stExon;1stExon;5'UTR;5'UTR;5'UTR;5'UTR;5'UTR;5'UTR;5'UTR;5'UTR;5'UTR;5'UTR;5'UTR	FALSE	Yes
cg16801601	2.26e-07	+++++	0.000135703	10	6600423	PRKCQ;PRKCQ;PRKCQ;PRKCQ	5'UTR;5'UTR;5'UTR;5'UTR	FALSE	Yes
cg24470403	2.28e-07	-----	0.000136558	14	52733119	PTGDR;PTGDR	TSS1500;TSS1500	FALSE	Yes
cg02921845	2.28e-07	+++++	0.000136558	2	38776502			FALSE	Yes
cg15199134	2.29e-07	-----	0.000136926	2	231791116	GPR55	TSS1500	FALSE	Yes
cg22181129	2.31e-07	-----	0.00013789	4	159924330	C4orf45	Body	FALSE	Yes
cg19288676	2.31e-07	-----	0.00013789	2	168366363			FALSE	Yes
cg07573085	2.35e-07	+++++	0.000139807	4	1832536	LETM1	Body	FALSE	Yes
cg05572037	2.37e-07	-----	0.000140879	7	100201561	PCOLCE;PCOLCE-AS1;PCOLCE	ExonBnd;Body;Body	FALSE	Yes
cg16260976	2.44e-07	-----	0.000144316	5	134816424			FALSE	Yes
cg03111263	2.44e-07	-----	0.000144316	1	54879193			FALSE	Yes
cg23245017	2.44e-07	-----	0.000144316	6	31535999			FALSE	Yes
cg07811915	2.45e-07	++++?	0.000144787	7	144509662	TPK1;TPK1	Body;Body	FALSE	Yes
cg27284693	2.46e-07	-----	0.000145257	1	167570711			FALSE	Yes
cg00065944	2.47e-07	+++++	0.000145484	13	77015067			FALSE	Yes
cg13449351	2.49e-07	+++++	0.00014642	2	2709561			FALSE	Yes
cg16731493	2.51e-07	+++++	0.000147474	6	4906599	CDYL;CDYL;CDYL;CDYL	Body;Body;Body;Body	FALSE	Yes
cg06739059	2.58e-07	-----	0.000151087	2	96991826	ITPRIPL1;ITPRIPL1;ITPRIPL1;ITPRIPL1	5'UTR;TSS200;TSS200;Body	FALSE	Yes
cg17096126	2.61e-07	+++++	0.000152341	19	35786620	MAG;MAG;MAG	Body;Body;Body	FALSE	Yes
cg13002740	2.66e-07	+++++	0.000155005	20	62367632	LIME1;LIME1;LIME1	5'UTR;TSS200;TSS200	FALSE	Yes
cg04713176	2.66e-07	+++++	0.000155005	12	4497426			FALSE	Yes
cg10726445	2.72e-07	+++++	0.000157983	13	76336809	LMO7;LMO7;LMO7	5'UTR;Body;Body	FALSE	Yes
cg11649105	2.74e-07	-----	0.000158884	8	142402800			FALSE	Yes
cg11533519	2.75e-07	-----	0.000159204	20	4954399	SLC23A2;SLC23A2	5'UTR;5'UTR	FALSE	Yes
cg00075587	2.75e-07	+++++	0.000159204	15	77627815	PEAK1	5'UTR	FALSE	Yes
cg08316204	2.78e-07	-----	0.00016081	20	35973919	SRC;SRC	TSS1500;5'UTR	FALSE	Yes
cg02375821	2.79e-07	----?	0.000161126	3	58809818	C3orf67-AS1;C3orf67	TSS1500;Body	FALSE	Yes
cg05954282	2.89e-07	-----	0.000166226	12	58819529			FALSE	Yes
cg27516795	2.98e-07	+++++	0.000170711	3	36901258	TRANK1	Body	FALSE	Yes
cg15581501	3.07e-07	-----	0.000175583	20	45980204	ZMYND8;ZMYND8;ZMYND8;ZMYND8;ZMYND8;ZMYND8;ZMYND8;ZMYND8;ZMYND8;ZMYND8;ZMYND8;ZMYND8;ZMYND8;ZMYND8;ZMYND8;ZMYND8;ZMYND8;ZMYND8	5'UTR;5'UTR;5'UTR;5'UTR;5'UTR;Body;Body;Body;Body;Body;Body;Body;Body;Body;Body;Body;Body;Body	FALSE	Yes
cg20062762	3.08e-07	-----	0.000175731	14	74207053	ELMSAN1;ELMSAN1	5'UTR;5'UTR	FALSE	Yes
cg08778768	3.08e-07	-----	0.000175731	15	70052769			FALSE	Yes
cg11041362	3.08e-07	+++++	0.000175731	3	31026296			FALSE	Yes
cg16495683	3.09e-07	-----	0.000176019	17	38464162	RARA	TSS1500	FALSE	Yes
cg27031987	3.09e-07	+++-+	0.000176019	8	77527376	ZFHX4-AS1	Body	FALSE	Yes
cg13211916	3.12e-07	+++++	0.000177443	13	115027249	CDC16;CDC16	Body;Body	FALSE	Yes
cg19305903	3.15e-07	-----	0.000178577	19	11203039	LDLR;LDLR;LDLR;LDLR;LDLR	Body;Body;Body;Body;Body	FALSE	Yes
cg02999757	3.16e-07	+++++	0.000178859	17	2381272	METTL16	Body	FALSE	Yes
cg06679537	3.23e-07	+++++	0.000182385	9	112210147	PTPN3;PTPN3;PTPN3;PTPN3	Body;Body;Body;Body	FALSE	Yes
cg13241295	3.28e-07	--+--	0.000185061	20	48323152	B4GALT5	Body	FALSE	Yes
cg10473257	3.33e-07	-----	0.000187584	10	88719111	SNCG	Body	FALSE	Yes
cg07567533	3.4e-07	+++++	0.000190922	22	47527330	TBC1D22A;TBC1D22A;TBC1D22A;TBC1D22A;TBC1D22A	Body;Body;Body;Body;Body	FALSE	Yes
cg16973808	3.42e-07	+++++	0.00019159	18	29238851	B4GALT6	Body	FALSE	Yes
cg11873026	3.45e-07	-----	0.000192815	3	129326664	PLXND1	TSS1500	FALSE	Yes
cg26275598	3.49e-07	+++++	0.000194744	8	124167044			FALSE	Yes
cg06520829	3.49e-07	+++++	0.000194744	1	21680109			FALSE	Yes
cg04292247	3.51e-07	-----	0.000195553	1	26298376	PAFAH2	Body	FALSE	Yes
cg10756618	3.51e-07	-----	0.000195553	3	126627942	CHCHD6	Body	FALSE	Yes
cg15020502	3.54e-07	-----	0.00019707	21	40180134	ETS2;ETS2	5'UTR;Body	FALSE	Yes
cg02097767	3.55e-07	-----	0.000197471	18	9095343			FALSE	Yes
cg26048493	3.59e-07	+++++	0.000199384	1	6354272	ACOT7;ACOT7;ACOT7;ACOT7	Body;Body;Body;Body	FALSE	Yes
cg08959878	3.67e-07	+++++	0.00020335	2	2710266			FALSE	Yes
cg20543683	3.7e-07	-----	0.000204853	16	68812420	CDH1	Body	FALSE	Yes
cg27154217	3.72e-07	-----	0.0002058	5	50023127	PARP8;PARP8;PARP8	Body;Body;Body	FALSE	Yes
cg03671627	3.74e-07	+++++	0.000206584	2	209185667	PIKFYVE	Body	FALSE	Yes
cg25035681	3.77e-07	-----	0.00020808	10	64677781			FALSE	Yes
cg12530192	3.78e-07	+++++	0.000208308	1	174761118	RABGAP1L	Body	FALSE	Yes
cg23287816	3.78e-07	+++++	0.000208308	14	39846355			FALSE	Yes
cg00528676	3.8e-07	-----	0.000208924	5	130548491			FALSE	Yes
cg03995933	3.85e-07	+++++	0.000211346	9	132641421	USP20;USP20;USP20	Body;Body;Body	FALSE	Yes
cg19889423	3.98e-07	+++++	0.000217977	6	4935880	CDYL;CDYL;CDYL;CDYL	Body;Body;Body;Body	FALSE	Yes
cg05796981	4.16e-07	-----	0.000226438	1	228275734	ARF1;ARF1;ARF1;ARF1	5'UTR;5'UTR;5'UTR;5'UTR	FALSE	Yes
cg04752731	4.22e-07	+++++	0.000228827	17	16891388			FALSE	Yes
cg18120298	4.24e-07	+++++	0.000229737	1	167624770	RCSD1	Body	FALSE	Yes
cg17381713	4.29e-07	-----	0.000232092	14	65689262	LOC100128233	TSS200	FALSE	Yes
cg06436493	4.41e-07	+++++	0.000237318	1	211665438	RD3;RD3;RD3;RD3	1stExon;1stExon;5'UTR;5'UTR	FALSE	Yes
cg13383842	4.45e-07	-----	0.00023929	17	80292603	SECTM1	TSS1500	FALSE	Yes
cg22096616	4.49e-07	-----	0.000241258	11	19799394	NAV2;NAV2;NAV2;NAV2	Body;Body;Body;Body	FALSE	Yes
cg07155243	4.51e-07	-----	0.00024215	1	61870246	NFIA;NFIA;NFIA;NFIA	Body;Body;Body;Body	FALSE	Yes
cg25639280	4.54e-07	+++-+	0.000243576	16	31188734			FALSE	Yes
cg10929802	4.6e-07	+++++	0.000246609	7	98706986	SMURF1;SMURF1;SMURF1	Body;Body;Body	FALSE	Yes
cg24825894	4.63e-07	+++++	0.00024803	10	98478267	PIK3AP1	Body	FALSE	Yes
cg06000943	4.69e-07	-----	0.000250113	1	110632445	LINC01397	Body	FALSE	Yes
cg02693701	4.69e-07	+++++	0.000250113	1	42340205	HIVEP3;HIVEP3;HIVEP3;HIVEP3	5'UTR;5'UTR;Body;Body	FALSE	Yes
cg18667929	4.71e-07	-----	0.000250991	14	102291089	PPP2R5C;PPP2R5C;PPP2R5C;PPP2R5C;PPP2R5C	Body;Body;Body;Body;Body	FALSE	Yes
cg10261512	4.72e-07	+++++	0.000251335	7	4773628	FOXK1	Body	FALSE	Yes
cg14370061	4.74e-07	+++++	0.000252211	7	2811345	GNA12;GNA12;GNA12	Body;Body;Body	FALSE	Yes
cg20299496	4.79e-07	-----	0.00025449	2	233233089			FALSE	Yes
cg10359480	4.81e-07	-----	0.000255362	6	106546540	PRDM1;PRDM1	TSS200;Body	FALSE	Yes
cg01925253	4.83e-07	+++++	0.000256189	4	153231501			FALSE	Yes
cg02464519	4.84e-07	-----	0.000256189	15	41158367			FALSE	Yes
cg20296888	4.84e-07	+++++	0.000256189	12	121525638			FALSE	Yes
cg25433915	4.86e-07	+++++	0.000256864	11	94822086	ENDOD1	TSS1500	FALSE	Yes
cg01297530	4.89e-07	+++++	0.000257492	21	35724208			FALSE	Yes
cg19004918	4.91e-07	-----	0.000258354	12	75877468	GLIPR1	Body	FALSE	Yes
cg22279159	4.99e-07	-----	0.000261787	4	26199269			FALSE	Yes
cg22818074	5.02e-07	+++++	0.000262973	15	66764860	MAP2K1	Body	FALSE	Yes
cg12738529	5.1e-07	-----	0.00026677	14	56039435			FALSE	Yes
cg00754432	5.11e-07	-----	0.000267097	1	118766252			FALSE	Yes
cg03258293	5.3e-07	-----	0.000276215	2	222384727	EPHA4;EPHA4;EPHA4	Body;Body;Body	FALSE	Yes
cg27626216	5.35e-07	-----	0.000278208	20	17826974			FALSE	Yes
cg25151926	5.36e-07	+++++	0.000278321	5	37915406			FALSE	Yes
cg15792125	5.47e-07	+++++	0.000283618	14	22926867			FALSE	Yes
cg08705753	5.49e-07	-----	0.000284447	12	27485144	ARNTL2;ARNTL2;ARNTL2;ARNTL2;ARNTL2	TSS1500;TSS1500;TSS1500;TSS1500;TSS1500	FALSE	Yes
cg00827939	5.56e-07	-----	0.000287864	22	39848852			FALSE	Yes
cg18894092	5.62e-07	-----	0.000290125	2	220325867	SPEG;SPEG	5'UTR;Body	FALSE	Yes
cg13801569	5.71e-07	+++++	0.000294343	20	42588202	TOX2;TOX2;TOX2;TOX2	Body;5'UTR;5'UTR;Body	FALSE	Yes
cg13714975	5.73e-07	+++++	0.000294946	11	33718099			FALSE	Yes
cg07918777	5.82e-07	+++++	0.000299145	1	117505510	PTGFRN	Body	FALSE	Yes
cg24478949	5.9e-07	+++++	0.000303038	22	33964309	LARGE;LARGE	Body;Body	FALSE	Yes
cg27653724	6.05e-07	++-++	0.000309846	13	67797104	PCDH9;PCDH9	Body;Body	FALSE	Yes
cg04858539	6.05e-07	+++++	0.000309846	22	33964297	LARGE;LARGE	Body;Body	FALSE	Yes
cg10553969	6.09e-07	+++++	0.000311221	14	52295311			FALSE	Yes
cg07554758	6.16e-07	----?	0.000314121	2	223904541			FALSE	Yes
cg06188448	6.24e-07	-----	0.000316835	16	3108453	MMP25;MMP25-AS1	Body;Body	FALSE	Yes
cg03051767	6.24e-07	-----	0.000316835	6	101040832	ASCC3	Body	FALSE	Yes
cg04323816	6.27e-07	+++++	0.000317225	22	40784430	SGSM3;SGSM3	5'UTR;5'UTR	FALSE	Yes
cg03086732	6.3e-07	-----	0.000318516	7	86722055			FALSE	Yes
cg21495922	6.36e-07	-----	0.000321092	22	20877285	MED15;MED15;MED15;MED15;MED15;MED15	5'UTR;Body;Body;Body;Body;5'UTR	FALSE	Yes
cg17415380	6.39e-07	-----	0.000322378	3	71447574	FOXP1;FOXP1;FOXP1;FOXP1;FOXP1	5'UTR;5'UTR;5'UTR;5'UTR;5'UTR	FALSE	Yes
cg26869211	6.41e-07	+++++	0.000322699	17	58309224	SCARNA20;USP32	TSS1500;Body	FALSE	Yes
cg05245822	6.45e-07	-----	0.000324483	18	37550141			FALSE	Yes
cg02104900	6.55e-07	-----	0.000329281	8	125667339	MTSS1;MTSS1;MTSS1	Body;Body;Body	FALSE	Yes
cg19582805	6.6e-07	-----	0.000331559	2	20382487			FALSE	Yes
cg19692648	6.64e-07	-----	0.000332863	4	109087980	LEF1-AS1;LEF1;LEF1;LEF1;LEF1	TSS1500;TSS200;Body;Body;Body	FALSE	Yes
cg25006149	6.65e-07	+++++	0.000332894	1	243671885	AKT3;AKT3;AKT3	Body;Body;Body	FALSE	Yes
cg05980458	6.65e-07	+++++	0.000332894	13	41936259	NAA16	Body	FALSE	Yes
cg00809772	6.7e-07	+++++	0.000335161	11	6768084			FALSE	Yes
cg24447728	6.71e-07	+++++	0.000335425	2	166451723	CSRNP3;CSRNP3;CSRNP3;CSRNP3	ExonBnd;ExonBnd;Body;Body	FALSE	Yes
cg22731412	6.73e-07	+++++	0.000336188	17	65487636	PITPNC1;PITPNC1	Body;Body	FALSE	Yes
cg26519582	6.85e-07	-----	0.000341702	11	67115713	LOC100130987	Body	FALSE	Yes
cg16034426	6.9e-07	+++-+	0.000343713	2	44518865	SLC3A1	Body	FALSE	Yes
cg27609154	6.98e-07	-----	0.000347211	13	107027105			FALSE	Yes
cg11146476	6.98e-07	++++?	0.000347211	18	12857703	PTPN2;PTPN2;PTPN2;PTPN2	Body;Body;Body;Body	FALSE	Yes
cg10473623	7.01e-07	-----	0.00034846	11	20119176	NAV2;NAV2;NAV2;NAV2;NAV2	Body;Body;Body;Body;Body	FALSE	Yes
cg27040089	7.04e-07	-----	0.000349706	3	9833706	ARPC4;ARPC4;ARPC4;ARPC4-TTLL3;TADA3;TADA3;TADA3;ARPC4;TADA3	TSS1500;TSS1500;TSS1500;TSS1500;5'UTR;5'UTR;5'UTR;TSS1500;Body	FALSE	Yes
cg14868760	7.1e-07	-----	0.000352194	21	16576813			FALSE	Yes
cg23567872	7.12e-07	-----	0.00035294	14	38759910			FALSE	Yes
cg13038318	7.13e-07	-----	0.000353189	X	68141708			FALSE	Yes
cg06584448	7.17e-07	-----	0.000354923	17	75456620	SEPT9;SEPT9;SEPT9;SEPT9;SEPT9;SEPT9;SEPT9;SEPT9;SEPT9;SEPT9	Body;Body;Body;Body;5'UTR;5'UTR;5'UTR;Body;Body;Body	FALSE	Yes
cg26075090	7.34e-07	-----	0.000361825	4	25865375	SEL1L3;SEL1L3;SEL1L3	TSS1500;TSS200;TSS200	FALSE	Yes
cg20606301	7.38e-07	+++++	0.000363545	17	9571882	USP43;USP43	Body;Body	FALSE	Yes
cg01257422	7.54e-07	-----	0.000371169	7	55543698	VOPP1;VOPP1;VOPP1;VOPP1	Body;Body;Body;Body	FALSE	Yes
cg11913482	7.55e-07	-----	0.000371404	7	31036170			FALSE	Yes
cg13530937	7.57e-07	+++++	0.000371873	16	27760277	KIAA0556	Body	FALSE	Yes
cg05894355	7.6e-07	-----	0.000373089	1	50574236	ELAVL4;ELAVL4;ELAVL4;ELAVL4;ELAVL4;ELAVL4	TSS1500;TSS1500;TSS1500;Body;Body;Body	FALSE	Yes
cg24525238	7.66e-07	+++-+	0.000375774	8	130305094			FALSE	Yes
cg01989524	7.7e-07	+++++	0.000377476	5	36961237	NIPBL;NIPBL	Body;Body	FALSE	Yes
cg19147608	7.75e-07	+++++	0.000379665	2	235024837			FALSE	Yes
cg20745261	7.79e-07	-----	0.000381362	8	119662208	SAMD12-AS1	Body	FALSE	Yes
cg19965693	7.81e-07	-----	0.000382077	2	163175743	IFIH1	TSS1500	FALSE	Yes
cg18122056	7.82e-07	+++++	0.000382303	17	61113319	TANC2;MIR548W	Body;Body	FALSE	Yes
cg11718989	7.86e-07	+++++	0.000383204	5	156990923	ADAM19	Body	FALSE	Yes
cg20263678	8.08e-07	-----	0.000392851	22	30721358	TBC1D10A;TBC1D10A	Body;Body	FALSE	Yes
cg05360682	8.1e-07	-----	0.000393554	14	105536542			FALSE	Yes
cg20420933	8.13e-07	-----	0.000394203	2	188034331			FALSE	Yes
cg15140557	8.16e-07	-----	0.000394849	4	10098295	WDR1;WDR1	Body;Body	FALSE	Yes
cg19764841	8.19e-07	+++++	0.000396031	20	62368565	LIME1;LIME1;LIME1	5'UTR;5'UTR;5'UTR	FALSE	Yes
cg13264209	8.21e-07	+++++	0.000396728	21	37888745	CLDN14;CLDN14	5'UTR;5'UTR	FALSE	Yes
cg13617202	8.4e-07	-----	0.000404808	17	49025289			FALSE	Yes
cg23344409	8.42e-07	-----	0.000405496	19	16997461			FALSE	Yes
cg09531260	8.53e-07	-----	0.000410238	20	43181661	PKIG;PKIG;PKIG;PKIG	5'UTR;5'UTR;5'UTR;5'UTR	FALSE	Yes
cg20019675	8.54e-07	-----	0.000410441	8	48572058	SPIDR;SPIDR;SPIDR;SPIDR	Body;Body;Body;Body	FALSE	Yes
cg17850359	8.59e-07	-----	0.000412565	2	220325982	SPEG;SPEG	5'UTR;Body	FALSE	Yes
cg17799614	8.78e-07	+++++	0.000420553	21	36607318			FALSE	Yes
cg25832100	8.9e-07	++-++	0.000426013	19	16677411	SLC35E1	Body	FALSE	Yes
cg07791547	9e-07	-----	0.000430408	2	199742217			FALSE	Yes
cg18696449	9.01e-07	-----	0.000430408	1	150121027	PLEKHO1;PLEKHO1;PLEKHO1	TSS1500;TSS1500;TSS1500	FALSE	Yes
cg06534890	9.08e-07	-----	0.000432879	11	126224696	ST3GAL4;ST3GAL4;ST3GAL4-AS1	TSS1500;TSS1500;Body	FALSE	Yes
cg15485809	9.16e-07	+++++	0.0004364	7	145545926			FALSE	Yes
cg10467021	9.19e-07	-----	0.000437243	20	45981590	ZMYND8;ZMYND8;ZMYND8;ZMYND8;ZMYND8;ZMYND8;ZMYND8;ZMYND8;ZMYND8;ZMYND8;ZMYND8;ZMYND8;ZMYND8;ZMYND8;ZMYND8;ZMYND8;ZMYND8;ZMYND8	5'UTR;5'UTR;5'UTR;5'UTR;5'UTR;Body;Body;Body;Body;Body;Body;Body;Body;Body;Body;Body;Body;Body	FALSE	Yes
cg08823864	9.27e-07	-----	0.000440459	11	58344529	LPXN;LPXN;LPXN	TSS1500;5'UTR;Body	FALSE	Yes
cg04615529	9.32e-07	+++++	0.000442539	5	149237013			FALSE	Yes
cg23149770	9.51e-07	+++++	0.000450957	5	171393566	FBXW11;FBXW11;FBXW11	Body;Body;Body	FALSE	Yes
cg03144189	9.63e-07	+++++	0.000456343	1	227734067			FALSE	Yes
cg21883059	9.94e-07	-----	0.000469155	6	52118417			FALSE	Yes
cg08774778	9.94e-07	-----	0.000469155	5	61378387			FALSE	Yes
cg17127121	1e-06	-----	0.000471674	12	52973897			FALSE	Yes
cg17472649	1.01e-06	+++++	0.000475129	11	35835797			FALSE	Yes
cg10392263	1.02e-06	-----	0.000478882	5	177036887	B4GALT7	3'UTR	FALSE	Yes
cg12039221	1.02e-06	+++++	0.000478882	11	123950514			FALSE	Yes
cg08023500	1.03e-06	-----	0.000481984	3	21792875	ZNF385D	TSS200	FALSE	Yes
cg02159157	1.03e-06	+++++	0.000481984	11	32365507			FALSE	Yes
cg00526275	1.04e-06	-----	0.000485703	12	118811551	TAOK3	TSS1500	FALSE	Yes
cg04008455	1.06e-06	-----	0.000494394	15	75661449	MAN2C1;MAN2C1;MAN2C1;MAN2C1	TSS1500;TSS1500;TSS1500;TSS1500	FALSE	Yes
cg01364706	1.08e-06	-----	0.000502732	11	110199471			FALSE	Yes
cg22652934	1.08e-06	-----	0.000502732	21	36180035	RUNX1;RUNX1	Body;Body	FALSE	Yes
cg12228343	1.1e-06	-----	0.000510369	1	21416141	EIF4G3;EIF4G3;EIF4G3;EIF4G3	5'UTR;5'UTR;5'UTR;5'UTR	FALSE	Yes
cg02479789	1.1e-06	-----	0.000510369	10	63807920	ARID5B;ARID5B	TSS1500;Body	FALSE	Yes
cg01303725	1.1e-06	+++++	0.000510369	19	8781575			FALSE	Yes
cg09080576	1.11e-06	-----	0.000514673	9	134554089	RAPGEF1;RAPGEF1;RAPGEF1	Body;Body;Body	FALSE	Yes
cg19763025	1.12e-06	+++++	0.000518971	7	107577607	LAMB1	Body	FALSE	Yes
cg24567851	1.13e-06	-----	0.000521563	12	90272839			FALSE	Yes
cg05770389	1.13e-06	-----	0.000521563	6	88722796			FALSE	Yes
cg21614073	1.13e-06	+++++	0.000521563	22	29778692	AP1B1;AP1B1;AP1B1	5'UTR;5'UTR;5'UTR	FALSE	Yes
cg04807974	1.13e-06	+++++	0.000521563	22	36011991	MB;MB;MB	Body;Body;Body	FALSE	Yes
cg06729997	1.13e-06	+++++	0.000521563	2	106048284	FHL2	5'UTR	FALSE	Yes
cg24120297	1.14e-06	-----	0.000525155	13	72287312	DACH1;DACH1;DACH1	Body;Body;Body	FALSE	Yes
cg08152055	1.14e-06	+++++	0.000525155	3	73500979	PDZRN3;PDZRN3;PDZRN3;PDZRN3	Body;Body;Body;5'UTR	FALSE	Yes
cg18478697	1.16e-06	+++++	0.00053333	17	73050962	KCTD2;KCTD2;KCTD2	Body;Body;Body	FALSE	Yes
cg23457651	1.17e-06	-----	0.000536886	8	32730965			FALSE	Yes
cg15058033	1.17e-06	-----	0.000536886	22	50744372	PLXNB2	5'UTR	FALSE	Yes
cg04007813	1.17e-06	+++++	0.000536886	13	76378281	LMO7;LMO7;LMO7	5'UTR;Body;Body	FALSE	Yes
cg20385913	1.19e-06	-----	0.000545359	15	75054510			FALSE	Yes
cg07187827	1.2e-06	-----	0.000549233	9	140197798	NRARP	TSS1500	FALSE	Yes
cg00564657	1.2e-06	-----	0.000549233	16	85380957			FALSE	Yes
cg26337322	1.22e-06	-----	0.000556593	22	40573627	TNRC6B;TNRC6B;TNRC6B	TSS1500;TSS1500;Body	FALSE	Yes
cg01129810	1.22e-06	-----	0.000556593	1	43407645	SLC2A1	Body	FALSE	Yes
cg14205511	1.23e-06	-----	0.000560436	8	48572137	SPIDR;SPIDR;SPIDR;SPIDR	Body;Body;Body;Body	FALSE	Yes
cg03751759	1.24e-06	+++++	0.000564268	1	107695802	NTNG1;NTNG1;NTNG1	Body;Body;Body	FALSE	Yes
cg20425731	1.26e-06	-----	0.000572636	12	129850240	TMEM132D	Body	FALSE	Yes
cg01844491	1.26e-06	+++++	0.000572636	7	33972979	BMPER	Body	FALSE	Yes
cg00216055	1.27e-06	+++++	0.000576443	2	136889249			FALSE	Yes
cg01739886	1.28e-06	-----	0.00058024	15	40398548	BMF;BMF;BMF;BMF	5'UTR;5'UTR;5'UTR;TSS1500	FALSE	Yes
cg09747182	1.3e-06	-----	0.000586686	16	17543363	XYLT1	Body	FALSE	Yes
cg11709495	1.31e-06	+++++	0.000590448	7	129649151			FALSE	Yes
cg17951845	1.32e-06	-----	0.000594202	11	66235273	PELI3;PELI3;PELI3;PELI3	5'UTR;5'UTR;5'UTR;5'UTR	FALSE	Yes
cg19703023	1.32e-06	-----	0.000594202	17	8323910			FALSE	Yes
cg06014707	1.34e-06	-----	0.000602823	8	75667618	MIR2052HG	Body	FALSE	Yes
cg06414929	1.36e-06	-----	0.000610274	2	172957923			FALSE	Yes
cg10781276	1.38e-06	+++++	0.000617688	20	39946942			FALSE	Yes
cg21344290	1.39e-06	-----	0.00062099	10	101132556	CNNM1	Body	FALSE	Yes
cg21268503	1.43e-06	+++++	0.000637257	5	143191676	HMHB1	TSS200	FALSE	Yes
cg08258230	1.44e-06	-----	0.000640107	1	94534670	ABCA4	Body	FALSE	Yes
cg11977691	1.44e-06	+++++	0.000640107	2	151480611			FALSE	Yes
cg27218386	1.46e-06	-----	0.000647781	5	56634154			FALSE	Yes
cg10297486	1.46e-06	+++++	0.000647781	12	5670309			FALSE	Yes
cg15209676	1.47e-06	+++++	0.000650998	19	53169103	ZNF83;ZNF83;ZNF83;ZNF83;ZNF83	5'UTR;5'UTR;5'UTR;5'UTR;5'UTR	FALSE	Yes
cg13515834	1.47e-06	+++++	0.000650998	17	32498637	LOC101927239	Body	FALSE	Yes
cg13940246	1.48e-06	-----	0.000654611	12	6308654	CD9	TSS1500	FALSE	Yes
cg18929483	1.5e-06	-----	0.000661398	2	231586701	CAB39;CAB39;CAB39	5'UTR;5'UTR;5'UTR	FALSE	Yes
cg19458350	1.5e-06	+++++	0.000661398	14	103053390			FALSE	Yes
cg07316138	1.52e-06	+++++	0.0006698	8	87614531	CNGB3	Body	FALSE	Yes
cg11017510	1.53e-06	+++++	0.000672955	12	125365941			FALSE	Yes
cg25207013	1.54e-06	-----	0.000676515	20	36742528			FALSE	Yes
cg02419123	1.54e-06	+++++	0.000676515	8	20880673			FALSE	Yes
cg00238508	1.55e-06	+++++	0.000680487	3	71907737			FALSE	Yes
cg10934718	1.56e-06	-----	0.00068361	2	39667058	LOC728730	Body	FALSE	Yes
cg23460823	1.57e-06	-----	0.000687144	3	170444635			FALSE	Yes
cg17754500	1.58e-06	-----	0.000691095	3	99224966			FALSE	Yes
cg10957495	1.59e-06	-?---	0.000695041	5	979935			FALSE	Yes
cg13729146	1.6e-06	+++++	0.000698553	12	6874709	PTMS	TSS1500	FALSE	Yes
cg26882438	1.63e-06	-----	0.000710341	3	122399120	PARP14	TSS1500	FALSE	Yes
cg07811302	1.64e-06	-----	0.000713386	2	55180576	EML6	Body	FALSE	Yes
cg11755914	1.64e-06	++-++	0.000713386	3	61238787			FALSE	Yes
cg00841845	1.64e-06	+++++	0.000713386	3	190971168			FALSE	Yes
cg10122916	1.65e-06	-----	0.000716858	17	46623937	HOXB-AS1	Body	FALSE	Yes
cg21887497	1.66e-06	-----	0.000720321	6	109060301			FALSE	Yes
cg20033091	1.68e-06	-----	0.00072811	22	39860241	MGAT3	5'UTR	FALSE	Yes
cg25304129	1.72e-06	-----	0.000741825	22	26125490			FALSE	Yes
cg03702209	1.72e-06	+++++	0.000741825	8	92088904	OTUD6B;OTUD6B	5'UTR;Body	FALSE	Yes
cg21327055	1.72e-06	+++++	0.000741825	2	203182277			FALSE	Yes
cg09137809	1.74e-06	-----	0.000749541	8	38615556	TACC1	5'UTR	FALSE	Yes
cg09882672	1.74e-06	-----	0.000749541	15	75250543	RPP25	TSS1500	FALSE	Yes
cg14992311	1.75e-06	-----	0.000752936	7	154990707			FALSE	Yes
cg27383951	1.76e-06	+++++	0.00075678	7	138168729	TRIM24;TRIM24	Body;Body	FALSE	Yes
cg19404888	1.78e-06	+++++	0.000764454	7	36817004			FALSE	Yes
cg08031306	1.79e-06	--+--	0.00076782	11	86511196	PRSS23;PRSS23;PRSS23;PRSS23;PRSS23;PRSS23;PRSS23	TSS200;TSS200;TSS200;TSS200;TSS200;TSS200;5'UTR	FALSE	Yes
cg15760900	1.8e-06	-----	0.000771178	17	2115797	SMG6;SMG6;SMG6	Body;Body;Body	FALSE	Yes
cg17936567	1.81e-06	-----	0.000774528	22	39832667	TAB1;LOC100506472	3'UTR;Body	FALSE	Yes
cg02710230	1.83e-06	+++++	0.000782615	15	86296229			FALSE	Yes
cg02238229	1.84e-06	-----	0.000785946	14	106373139			FALSE	Yes
cg13177778	1.85e-06	-----	0.000789268	11	92900159	SLC36A4;SLC36A4	Body;Body	FALSE	Yes
cg14475564	1.87e-06	-----	0.000797322	6	13398821	GFOD1;GFOD1;GFOD1	Body;5'UTR;5'UTR	FALSE	Yes
cg01351601	1.92e-06	-----	0.000816679	5	42547402	GHR;GHR;GHR;GHR;GHR;GHR	TSS1500;TSS1500;5'UTR;5'UTR;Body;5'UTR	FALSE	Yes
cg26145333	1.92e-06	+++++	0.000816679	11	118958741	HMBS;HMBS;HMBS;HMBS;HMBS	5'UTR;Body;Body;1stExon;5'UTR	FALSE	Yes
cg20650823	1.93e-06	+++++	0.000819951	14	102946182	TECPR2	Body	FALSE	Yes
cg03238513	1.94e-06	-----	0.000823707	14	76619400	GPATCH2L;GPATCH2L;GPATCH2L	5'UTR;TSS1500;TSS1500	FALSE	Yes
cg07386640	1.95e-06	----?	0.000825978	14	38760089			FALSE	Yes
cg27040005	1.95e-06	-----	0.000825978	5	141062437	ARAP3	TSS1500	FALSE	Yes
cg27017599	1.95e-06	+++++	0.000825978	1	8205735			FALSE	Yes
cg14360579	1.96e-06	+++++	0.000827746	1	209542809			FALSE	Yes
cg11807314	1.96e-06	+++++	0.000827746	3	31746386	OSBPL10-AS1;OSBPL10;OSBPL10	Body;Body;Body	FALSE	Yes
cg27253415	1.97e-06	-----	0.000831475	10	114503026	VTI1A	Body	FALSE	Yes
cg13429998	2e-06	+++++	0.000842635	1	42384947	HIVEP3;HIVEP3;HIVEP3;HIVEP3	TSS1500;TSS1500;TSS1500;Body	FALSE	Yes
cg19750024	2.03e-06	-----	0.000852745	8	22068189	BMP1;BMP1	Body;Body	FALSE	Yes
cg14222701	2.03e-06	+++++	0.000852745	11	46564725	AMBRA1;AMBRA1;AMBRA1;AMBRA1	Body;Body;Body;Body	FALSE	Yes
cg04879308	2.04e-06	-----	0.000855428	5	419179	AHRR;AHRR	Body;Body	FALSE	Yes
cg11575089	2.04e-06	-----	0.000855428	1	155107462	SLC50A1;SLC50A1;SLC50A1;SLC50A1;SLC50A1;SLC50A1;SLC50A1;SLC50A1;SLC50A1;SLC50A1	TSS1500;TSS1500;TSS1500;TSS1500;TSS1500;TSS1500;TSS1500;TSS1500;TSS1500;TSS1500	FALSE	Yes
cg20594802	2.04e-06	+++++	0.000855428	3	189406736	TP63;TP63;TP63	Body;Body;Body	FALSE	Yes
cg04010387	2.05e-06	-----	0.000858608	20	61639613	BHLHE23;LOC63930	TSS1500;TSS1500	FALSE	Yes
cg19613578	2.06e-06	+++++	0.000862288	8	142055822			FALSE	Yes
cg24122386	2.08e-06	++-++	0.000869635	22	24078562			FALSE	Yes
cg11022133	2.12e-06	-----	0.000884277	2	35523653			FALSE	Yes
cg11730958	2.13e-06	--+--	0.000886885	5	118806244	HSD17B4;HSD17B4;HSD17B4;HSD17B4;HSD17B4	5'UTR;5'UTR;Body;Body;Body	FALSE	Yes
cg27184040	2.13e-06	+++++	0.000886885	22	30671639			FALSE	Yes
cg23640316	2.15e-06	+++++	0.000894688	22	29816350			FALSE	Yes
cg12726743	2.16e-06	-----	0.000898324	10	75634848	CAMK2G;CAMK2G;CAMK2G;CAMK2G;CAMK2G;CAMK2G	TSS1500;TSS1500;TSS1500;TSS1500;TSS1500;TSS1500	FALSE	Yes
cg17585440	2.17e-06	-----	0.000901427	19	2052181	MKNK2;MKNK2	TSS1500;TSS1500	FALSE	Yes
cg14765416	2.17e-06	+++++	0.000901427	2	122458296	NIFK-AS1	Body	FALSE	Yes
cg12716379	2.18e-06	-----	0.000904523	6	158388427			FALSE	Yes
cg25798632	2.19e-06	-----	0.000908142	17	77924774	TBC1D16;TBC1D16;TBC1D16;TBC1D16	TSS200;TSS200;TSS200;Body	FALSE	Yes
cg10413580	2.21e-06	-----	0.000914833	11	126174769	DCPS	Body	FALSE	Yes
cg14704878	2.24e-06	-----	0.000926172	21	38300274	HLCS;HLCS;HLCS	Body;Body;Body	FALSE	Yes
cg11640529	2.25e-06	-----	0.000929766	20	43180850	PKIG;PKIG;PKIG;PKIG	5'UTR;5'UTR;5'UTR;5'UTR	FALSE	Yes
cg12513760	2.27e-06	-----	0.000936396	17	75384890	SEPT9;SEPT9;SEPT9;SEPT9;SEPT9;SEPT9	Body;5'UTR;Body;Body;5'UTR;Body	FALSE	Yes
cg03719123	2.27e-06	-----	0.000936396	3	156799516	LINC00880	Body	FALSE	Yes
cg12444592	2.28e-06	-----	0.00093943	8	140621909	KCNK9	Body	FALSE	Yes
cg06079082	2.29e-06	+++++	0.000943003	6	23584501			FALSE	Yes
cg17707387	2.34e-06	-----	0.000960808	15	76640155			FALSE	Yes
cg04568559	2.34e-06	+++++	0.000960808	4	6262323			FALSE	Yes
cg03597723	2.38e-06	-----	0.000972734	16	17508684	XYLT1	Body	FALSE	Yes
cg23789121	2.41e-06	+++++	0.000983298	2	15909875			FALSE	Yes
cg07898952	2.42e-06	-----	0.00098568	11	33898816	LMO2	5'UTR	FALSE	Yes
cg14861638	2.42e-06	+++++	0.00098568	1	150997146	PRUNE;PRUNE;PRUNE;PRUNE;PRUNE;PRUNE;PRUNE;PRUNE	5'UTR;Body;Body;Body;Body;Body;Body;Body	FALSE	Yes
cg02976927	2.43e-06	-----	0.000989185	3	9958030	IL17RE;IL17RC;IL17RC;IL17RC;IL17RC;IL17RC;IL17RC;IL17RC;IL17RE;IL17RE;IL17RE;IL17RE	3'UTR;TSS1500;TSS1500;TSS1500;TSS1500;TSS1500;TSS1500;TSS1500;3'UTR;3'UTR;3'UTR;Body	FALSE	Yes
cg13004765	2.44e-06	-----	0.000992687	2	74779853	LOXL3;LOXL3;DOK1	5'UTR;5'UTR;5'UTR	FALSE	Yes
cg23064281	2.46e-06	----?	0.00100025	6	13537911			FALSE	Yes
cg17565444	2.47e-06	-----	0.00100317	14	94429203	ASB2	Body	FALSE	Yes
cg01795822	2.48e-06	+++++	0.00100608	1	10528093	DFFA;DFFA	Body;Body	FALSE	Yes
cg02268851	2.5e-06	-----	0.00101131	11	47545207	CELF1;CELF1;CELF1	1stExon;5'UTR;5'UTR	FALSE	Yes
cg14663940	2.5e-06	-----	0.00101131	3	183894397	AP2M1;AP2M1	5'UTR;5'UTR	FALSE	Yes
cg14528468	2.52e-06	-----	0.0010165	5	133394665			FALSE	Yes
cg00322814	2.52e-06	-----	0.0010165	15	52393233			FALSE	Yes
cg14937950	2.52e-06	-----	0.0010165	1	90094911	FLJ27354	Body	FALSE	Yes
cg20682754	2.52e-06	+++++	0.0010165	4	177254388			FALSE	Yes
cg22857777	2.53e-06	+++++	0.00101938	1	37089200			FALSE	Yes
cg25897223	2.54e-06	-----	0.00102109	17	38096333	LRRC3C	TSS1500	FALSE	Yes
cg09005171	2.54e-06	-----	0.00102109	1	6552140	PLEKHG5;PLEKHG5;PLEKHG5;PLEKHG5;PLEKHG5	TSS1500;TSS1500;Body;Body;Body	FALSE	Yes
cg22102770	2.55e-06	-----	0.00102222	7	139333869	HIPK2;HIPK2	Body;Body	FALSE	Yes
cg06011204	2.55e-06	-----	0.00102222	3	21870271			FALSE	Yes
cg21182799	2.55e-06	+++++	0.00102222	10	128327492			FALSE	Yes
cg25989755	2.55e-06	+++++	0.00102222	4	151134483	DCLK2;DCLK2;DCLK2	Body;Body;Body	FALSE	Yes
cg25360591	2.58e-06	----?	0.00103308	5	163780345			FALSE	Yes
cg21053786	2.61e-06	-----	0.00104333	3	151737433			FALSE	Yes
cg20677824	2.64e-06	-----	0.00105295	5	106724406	EFNA5	Body	FALSE	Yes
cg06068863	2.64e-06	-----	0.00105295	20	48843549			FALSE	Yes
cg08962594	2.64e-06	-----	0.00105295	7	100180636	LRCH4;LRCH4	Body;Body	FALSE	Yes
cg07654579	2.66e-06	-----	0.00106033	11	3859633	RHOG	5'UTR	FALSE	Yes
cg20732869	2.67e-06	-----	0.00106253	11	35314759	SLC1A2;SLC1A2;SLC1A2	Body;Body;Body	FALSE	Yes
cg04850538	2.75e-06	++-++	0.00109253	1	117359192			FALSE	Yes
cg24016523	2.78e-06	+++++	0.00110198	12	117418384	LOC100506551;FBXW8;FBXW8	Body;Body;Body	FALSE	Yes
cg11404915	2.79e-06	-----	0.00110471	12	127610471			FALSE	Yes
cg26636279	2.79e-06	-----	0.00110471	3	112677997	CD200R1;CD200R1;CD200R1;CD200R1	Body;Body;Body;Body	FALSE	Yes
cg12244711	2.84e-06	-----	0.00112263	17	41655950			FALSE	Yes
cg01011313	2.86e-06	-----	0.00112865	2	129248181			FALSE	Yes
cg03916318	2.9e-06	-----	0.00114	12	53399350	EIF4B;EIF4B	TSS1500;TSS1500	FALSE	Yes
cg25739742	2.9e-06	+++++	0.00114	10	63540323			FALSE	Yes
cg17691612	2.93e-06	+++++	0.00115116	4	26809211			FALSE	Yes
cg03247739	2.96e-06	+++++	0.00116038	16	3910867	CREBBP;CREBBP	Body;Body	FALSE	Yes
cg25431484	2.96e-06	+++++	0.00116038	11	34592283			FALSE	Yes
cg15256480	3e-06	-----	0.00117347	9	128193968			FALSE	Yes
cg03351508	3.02e-06	-----	0.00117999	21	16591598			FALSE	Yes
cg08393867	3.02e-06	-----	0.00117999	17	38637246	TNS4	Body	FALSE	Yes
cg16038030	3.03e-06	-----	0.00118325	6	106589908			FALSE	Yes
cg04991650	3.04e-06	-----	0.0011865	3	193693219	LOC647323	Body	FALSE	Yes
cg02759869	3.05e-06	-----	0.00118845	3	52738906	GLT8D1;SPCS1;GLT8D1;GLT8D1;GLT8D1;GLT8D1	TSS1500;TSS1500;5'UTR;5'UTR;5'UTR;5'UTR	FALSE	Yes
cg01918977	3.05e-06	-----	0.00118845	19	12897075			FALSE	Yes
cg17083132	3.05e-06	+++++	0.00118845	14	78668470	NRXN3	Body	FALSE	Yes
cg12709196	3.07e-06	-----	0.00119558	1	26616481	UBXN11;UBXN11;UBXN11	Body;Body;Body	FALSE	Yes
cg16859352	3.08e-06	-----	0.00119685	10	106090233	ITPRIP;ITPRIP;ITPRIP	TSS1500;5'UTR;5'UTR	FALSE	Yes
cg24889777	3.08e-06	+++++	0.00119685	16	67552713	LOC100505942	Body	FALSE	Yes
cg06918740	3.12e-06	-----	0.00120712	19	18509973			FALSE	Yes
cg05522807	3.12e-06	-----	0.00120712	15	75069194			FALSE	Yes
cg18581972	3.12e-06	+++++	0.00120712	21	17680819	MIR99AHG;MIR99AHG;MIR99AHG;MIR99AHG	Body;Body;Body;Body	FALSE	Yes
cg13226907	3.17e-06	-----	0.00122247	9	99383434	CDC14B;CDC14B	TSS1500;TSS1500	FALSE	Yes
cg15829114	3.18e-06	-----	0.00122566	14	53617878	DDHD1;DDHD1;DDHD1	Body;Body;Body	FALSE	Yes
cg09747669	3.19e-06	-----	0.00122884	20	62372750	SLC2A4RG	Body	FALSE	Yes
cg19471485	3.2e-06	+++++	0.00123003	5	96023676	CAST;CAST	5'UTR;Body	FALSE	Yes
cg16145674	3.2e-06	+++++	0.00123003	7	55501178	LANCL2	3'UTR	FALSE	Yes
cg04353103	3.21e-06	++++?	0.00123254	4	56196461			FALSE	Yes
cg16841325	3.21e-06	++-++	0.00123254	7	129603394			FALSE	Yes
cg20157888	3.23e-06	+++++	0.00123888	10	98447831	PIK3AP1	Body	FALSE	Yes
cg17656532	3.27e-06	-----	0.00125152	2	231789987	GPR55	TSS200	FALSE	Yes
cg03584763	3.28e-06	+++++	0.00125399	5	132672047	FSTL4	Body	FALSE	Yes
cg13377771	3.29e-06	+++++	0.00125714	17	78398120	ENDOV;ENDOV;ENDOV	Body;Body;Body	FALSE	Yes
cg27542454	3.34e-06	----?	0.00127214	12	54677325	HNRNPA1P10;HNRNPA1;HNRNPA1	Body;Body;Body	FALSE	Yes
cg01089682	3.34e-06	-----	0.00127214	6	43823056			FALSE	Yes
cg08371497	3.34e-06	+++++	0.00127214	22	27029030			FALSE	Yes
cg17998522	3.35e-06	-----	0.00127458	2	160919830	PLA2R1;PLA2R1;PLA2R1	TSS1500;TSS1500;TSS1500	FALSE	Yes
cg23689050	3.36e-06	-----	0.0012777	10	81044831	ZMIZ1	Body	FALSE	Yes
cg05271749	3.39e-06	-----	0.00128704	10	22958319	PIP4K2A	Body	FALSE	Yes
cg09269869	3.4e-06	---?-	0.00128946	2	46562819	EPAS1	Body	FALSE	Yes
cg20717792	3.41e-06	+++++	0.00129187	17	17111358			FALSE	Yes
cg04437689	3.41e-06	+++++	0.00129187	8	42329324	SLC20A2;SLC20A2;SLC20A2	Body;Body;Body	FALSE	Yes
cg10119914	3.42e-06	-----	0.00129497	8	80656048			FALSE	Yes
cg07915862	3.44e-06	+++++	0.00130116	5	131396138	IL3	TSS1500	FALSE	Yes
cg05420545	3.46e-06	+++++	0.00130733	12	120103622			FALSE	Yes
cg08693224	3.47e-06	-----	0.00131041	8	103669614	KLF10	TSS1500	FALSE	Yes
cg00546403	3.49e-06	-----	0.00131517	7	130695732	LINC-PINT;LINC-PINT;LINC-PINT;LINC-PINT;LINC-PINT;LINC-PINT;LINC-PINT;LINC-PINT	Body;Body;Body;Body;Body;Body;Body;Body	FALSE	Yes
cg05667744	3.49e-06	+----	0.00131517	1	91631322			FALSE	Yes
cg24546528	3.49e-06	-----	0.00131517	22	50746699	PLXNB2	TSS1500	FALSE	Yes
cg07252680	3.51e-06	-----	0.0013213	14	94857224	SERPINA1;SERPINA1;SERPINA1;SERPINA1;SERPINA1;SERPINA1;SERPINA1;SERPINA1;SERPINA1;SERPINA1	TSS200;TSS200;TSS200;TSS200;TSS200;TSS200;TSS200;TSS200;TSS200;TSS200	FALSE	Yes
cg19364765	3.51e-06	++++?	0.0013213	8	77366948	LINC01111	Body	FALSE	Yes
cg26736724	3.56e-06	-----	0.00133729	12	6341333	CD9	Body	FALSE	Yes
cg17479843	3.57e-06	-----	0.00134034	2	231818776			FALSE	Yes
cg12467025	3.6e-06	---?-	0.00135017	16	66865112	NAE1;NAE1;NAE1;NAE1	TSS1500;TSS1500;TSS1500;TSS1500	FALSE	Yes
cg17885144	3.61e-06	-----	0.00135321	2	165245254			FALSE	Yes
cg00879680	3.62e-06	-----	0.00135624	1	110890221			FALSE	Yes
cg19174044	3.71e-06	-----	0.00138485	20	18446362	DZANK1	5'UTR	FALSE	Yes
cg01562603	3.72e-06	-----	0.00138785	15	31657070	KLF13;KLF13	Body;Body	FALSE	Yes
cg22711149	3.76e-06	-----	0.00140057	5	138611733	SNHG4;SNHG4;MATR3;MATR3;MATR3	Body;Body;5'UTR;5'UTR;5'UTR	FALSE	Yes
cg01497311	3.78e-06	-----	0.00140581	22	43509821	BIK	5'UTR	FALSE	Yes
cg06225131	3.78e-06	-----	0.00140581	19	4403593	CHAF1A	Body	FALSE	Yes
cg13482155	3.79e-06	-----	0.00140731	22	39868414	MGAT3	5'UTR	FALSE	Yes
cg02974089	3.81e-06	+++++	0.001414	11	62164435			FALSE	Yes
cg24124366	3.83e-06	-----	0.0014192	5	177815693	COL23A1	Body	FALSE	Yes
cg04132263	3.85e-06	-----	0.00142512	13	79968174	RBM26;RBM26;RBM26	Body;Body;Body	FALSE	Yes
cg08590978	3.85e-06	-----	0.00142512	9	130850935	SLC25A25	Body	FALSE	Yes
cg09684998	3.86e-06	+++++	0.00142808	3	111823744	C3orf52;C3orf52	Body;Body	FALSE	Yes
cg03081045	3.93e-06	+++++	0.0014487	4	145962699	ANAPC10;ANAPC10;ANAPC10;ANAPC10;ANAPC10;ANAPC10;ANAPC10;ANAPC10;ANAPC10	Body;Body;Body;Body;Body;Body;Body;Body;Body	FALSE	Yes
cg09800487	3.93e-06	+++++	0.0014487	14	106724968			FALSE	Yes
cg02548323	3.95e-06	+++++	0.00145531	7	101556938	CUX1;CUX1;CUX1;CUX1;CUX1;CUX1;CUX1	Body;Body;Body;Body;Body;Body;Body	FALSE	Yes
cg16419175	3.96e-06	+++++	0.00145824	20	50149601	NFATC2;NFATC2;NFATC2;NFATC2;NFATC2;NFATC2;NFATC2;NFATC2	5'UTR;5'UTR;5'UTR;5'UTR;Body;Body;Body;Body	FALSE	Yes
cg01347674	3.98e-06	-----	0.00146257	11	118134073	MPZL2;MPZL2	Body;Body	FALSE	Yes
cg22826695	3.98e-06	-----	0.00146257	3	133382446			FALSE	Yes
cg03416852	4.01e-06	-----	0.00147132	2	46157797	PRKCE	Body	FALSE	Yes
cg11540391	4.02e-06	-----	0.00147422	17	7855174			FALSE	Yes
cg03948182	4.03e-06	+++++	0.00147637	17	62348168			FALSE	Yes
cg19349910	4.1e-06	-----	0.00150046	1	48682965			FALSE	Yes
cg16057048	4.11e-06	-----	0.00150257	21	45341402	AGPAT3	5'UTR	FALSE	Yes
cg22679812	4.13e-06	+++++	0.00150833	16	70626213	IL34;IL34	5'UTR;5'UTR	FALSE	Yes
cg09582177	4.15e-06	-----	0.0015133	2	21451555			FALSE	Yes
cg18717076	4.16e-06	+++++	0.00151617	2	137134553			FALSE	Yes
cg06119871	4.2e-06	+++-+	0.0015284	3	136617564	NCK1;NCK1	5'UTR;5'UTR	FALSE	Yes
cg27629378	4.23e-06	-----	0.00153695	3	43236218			FALSE	Yes
cg24422188	4.25e-06	---+-	0.00154343	6	134499086	SGK1;SGK1	TSS200;Body	FALSE	Yes
cg17534597	4.28e-06	-----	0.00155274	5	179607394	RASGEF1C	5'UTR	FALSE	Yes
cg08250735	4.3e-06	-----	0.0015584	14	65231319	SPTB	Body	FALSE	Yes
cg00068745	4.33e-06	-----	0.00156688	19	16178203	TPM4	TSS200	FALSE	Yes
cg06579440	4.34e-06	+++++	0.00156969	6	41270673			FALSE	Yes
cg01346147	4.35e-06	+++++	0.00157251	6	36317409			FALSE	Yes
cg02346118	4.38e-06	-----	0.00158094	16	56296854	GNAO1;GNAO1	Body;Body	FALSE	Yes
cg03024690	4.46e-06	-----	0.0016033	3	172268675			FALSE	Yes
cg22672242	4.46e-06	-----	0.0016033	5	43068049	LOC100132356;LOC648987;LOC100506639	TSS1500;TSS1500;Body	FALSE	Yes
cg06540372	4.46e-06	-----	0.0016033	10	8100177	GATA3;GATA3	Body;Body	FALSE	Yes
cg07355152	4.47e-06	-----	0.00160608	6	12544391			FALSE	Yes
cg06760111	4.48e-06	++++?	0.00160805	3	21551522	ZNF385D	Body	FALSE	Yes
cg00499595	4.49e-06	+++++	0.0016092	8	42072523			FALSE	Yes
cg20990601	4.52e-06	-----	0.00161913	4	96023811	BMPR1B;BMPR1B;BMPR1B;BMPR1B	5'UTR;5'UTR;5'UTR;Body	FALSE	Yes
cg00280524	4.57e-06	+++++	0.00163211	5	141487482	NDFIP1	TSS1500	FALSE	Yes
cg18928039	4.61e-06	-----	0.00164474	6	127840044	SOGA3;SOGA3	5'UTR;1stExon	FALSE	Yes
cg08833255	4.61e-06	+++++	0.00164474	11	134594313			FALSE	Yes
cg08484900	4.63e-06	---+-	0.00164773	9	94857151	SPTLC1;SPTLC1;SPTLC1	Body;Body;Body	FALSE	Yes
cg26326160	4.64e-06	-----	0.00165047	20	41921081			FALSE	Yes
cg10003581	4.66e-06	-----	0.00165675	6	56755793	DST	Body	FALSE	Yes
cg10815411	4.67e-06	-----	0.00165948	11	7176226			FALSE	Yes
cg10713220	4.68e-06	-----	0.00166054	7	36640882	AOAH-IT1;AOAH;AOAH;AOAH	TSS1500;Body;Body;Body	FALSE	Yes
cg04415310	4.68e-06	+++++	0.00166054	12	124743637	ZNF664-FAM101A	5'UTR	FALSE	Yes
cg18759185	4.75e-06	-----	0.00168201	5	133985179	SEC24A;SEC24A	Body;Body	FALSE	Yes
cg08939673	4.8e-06	+++++	0.00169549	16	12769831	CPPED1;CPPED1	Body;Body	FALSE	Yes
cg06231148	4.81e-06	+++++	0.00169818	9	75782700	ANXA1	Body	FALSE	Yes
cg26680656	4.82e-06	+++++	0.00170002	13	43979482	ENOX1;ENOX1;ENOX1	Body;Body;Body	FALSE	Yes
cg16595241	4.85e-06	+++++	0.00170891	3	100354385	ADGRG7;ADGRG7;ADGRG7	1stExon;5'UTR;Body	FALSE	Yes
cg12517401	4.87e-06	-----	0.0017151	4	146099491	OTUD4	5'UTR	FALSE	Yes
cg21686943	4.89e-06	+++-+	0.00172044	7	132825408			FALSE	Yes
cg09589057	4.9e-06	-----	0.0017231	14	106351578			FALSE	Yes
cg22108930	4.91e-06	-----	0.00172577	7	111800870	DOCK4	Body	FALSE	Yes
cg16385423	4.92e-06	-----	0.00172843	19	6086362	RFX2;RFX2	5'UTR;5'UTR	FALSE	Yes
cg21263915	4.94e-06	+++++	0.00173459	8	59905615	TOX	Body	FALSE	Yes
cg22099081	4.99e-06	+++++	0.00175042	12	128296831			FALSE	Yes
cg01084684	5e-06	-----	0.0017522	3	71841017			FALSE	Yes
cg10221075	5.05e-06	-----	0.0017671	7	30292587			FALSE	Yes
cg01094182	5.08e-06	+++++	0.00177585	1	175256713			FALSE	Yes
cg18515426	5.12e-06	+++++	0.00178808	10	114981606			FALSE	Yes
cg16993186	5.15e-06	+++++	0.0017959	10	11224102	CELF2;CELF2;CELF2;CELF2	Body;Body;Body;Body	FALSE	Yes
cg07295086	5.19e-06	-----	0.00180719	X	10078646	WWC3	Body	FALSE	Yes
cg00676294	5.2e-06	+++++	0.0018089	8	69173390			FALSE	Yes
cg04483721	5.21e-06	-----	0.00180972	14	106373110			FALSE	Yes
cg21880733	5.21e-06	-----	0.00180972	11	77342278	CLNS1A	Body	FALSE	Yes
cg03500466	5.21e-06	+++++	0.00180972	3	22198608			FALSE	Yes
cg06135309	5.23e-06	+++++	0.00181578	10	6533971	PRKCQ;PRKCQ;PRKCQ;PRKCQ	Body;Body;Body;Body	FALSE	Yes
cg07351135	5.25e-06	+++++	0.00182005	17	32964046	TMEM132E	Body	FALSE	Yes
cg07416124	5.25e-06	+++++	0.00182005	14	30991682			FALSE	Yes
cg27617715	5.27e-06	+++++	0.0018261	2	200637602	FTCDNL1	Body	FALSE	Yes
cg19912070	5.29e-06	-----	0.00183035	7	5578718			FALSE	Yes
cg22003537	5.34e-06	-----	0.00184048	14	106363950			FALSE	Yes
cg20691469	5.34e-06	+++++	0.00184048	4	2691863	FAM193A;FAM193A;FAM193A;FAM193A;FAM193A;FAM193A	Body;Body;Body;Body;Body;Body	FALSE	Yes
cg01279908	5.43e-06	+++++	0.00186878	1	58326034	DAB1-AS1;DAB1-AS1;DAB1-AS1;DAB1-AS1;DAB1	TSS200;TSS200;TSS200;TSS200;5'UTR	FALSE	Yes
cg06743075	5.45e-06	-----	0.00187384	16	3108041	MMP25;MMP25-AS1	Body;Body	FALSE	Yes
cg00637980	5.46e-06	+++++	0.00187637	6	152470649	MIR3163;SYNE1;SYNE1	Body;Body;Body	FALSE	Yes
cg14772079	5.51e-06	-----	0.00189172	12	113362766			FALSE	Yes
cg04381100	5.53e-06	+++++	0.00189767	19	2926081			FALSE	Yes
cg23530333	5.68e-06	+++++	0.00194633	2	89054046			FALSE	Yes
cg16916987	5.7e-06	-----	0.0019513	20	45982166	ZMYND8;ZMYND8;ZMYND8;ZMYND8;ZMYND8;ZMYND8;ZMYND8;ZMYND8;ZMYND8;ZMYND8;ZMYND8;ZMYND8;ZMYND8;ZMYND8;ZMYND8;ZMYND8;ZMYND8;ZMYND8	5'UTR;5'UTR;5'UTR;5'UTR;5'UTR;Body;Body;Body;Body;Body;Body;Body;Body;Body;Body;Body;Body;Body	FALSE	Yes
cg02930969	5.74e-06	-----	0.00196404	14	102607181	HSP90AA1;WDR20;WDR20;WDR20;WDR20;WDR20;WDR20;WDR20;WDR20;WDR20	TSS1500;Body;Body;Body;Body;Body;Body;Body;Body;Body	FALSE	Yes
cg25924423	5.84e-06	+++++	0.00199346	9	7298152			FALSE	Yes
cg19624375	5.87e-06	+++++	0.00200274	1	32638221	KPNA6	3'UTR	FALSE	Yes
cg15401522	5.99e-06	-----	0.00204074	10	74052143			FALSE	Yes
cg18880190	6.02e-06	-----	0.00204998	15	40399609	BMF;BMF;BMF;BMF	5'UTR;5'UTR;TSS1500;TSS1500	FALSE	Yes
cg08645488	6.03e-06	-----	0.0020524	14	65263560	SPTB;SPTB	Body;Body	FALSE	Yes
cg12665138	6.06e-06	-----	0.00205965	11	32610465	EIF3M	Body;Body	FALSE	Yes
cg12094812	6.06e-06	+++-+	0.00205965	8	25903106	EBF2	TSS1500	FALSE	Yes
cg10969408	6.06e-06	+++++	0.00205965	16	46782337	MYLK3;MYLK3	TSS200;5'UTR	FALSE	Yes
cg05789925	6.07e-06	-----	0.00206206	3	186503451	EIF4A2;MIR1248;SNORA81	Body;TSS1500;TSS1500	FALSE	Yes
cg22626587	6.08e-06	+++++	0.00206447	16	14292940	MKL2;MKL2	Body;Body	FALSE	Yes
cg19457456	6.1e-06	+++++	0.00207027	2	127897367			FALSE	Yes
cg25644657	6.15e-06	-----	0.00208028	2	217363090	RPL37A	TSS1500	FALSE	Yes
cg18555368	6.15e-06	+++++	0.00208028	3	106982650	LINC00883	Body	FALSE	Yes
cg14691307	6.19e-06	-----	0.00209182	16	48442651	MIR5095	Body	FALSE	Yes
cg01013627	6.19e-06	-----	0.00209182	11	3875585	STIM1;STIM1;STIM1	TSS1500;TSS1500;TSS1500	FALSE	Yes
cg18463452	6.25e-06	+++++	0.00210809	15	41766831	RTF1;RTF1	ExonBnd;Body	FALSE	Yes
cg07875362	6.27e-06	+++++	0.00211283	13	49391343			FALSE	Yes
cg22147960	6.29e-06	-----	0.00211856	3	104325850			FALSE	Yes
cg02727835	6.33e-06	+++++	0.00213102	11	45940878	PEX16;PEX16	TSS1500;TSS1500	FALSE	Yes
cg17595290	6.37e-06	-----	0.00214144	10	3881532			FALSE	Yes
cg15251748	6.38e-06	-----	0.00214379	7	28993464	TRIL	3'UTR	FALSE	Yes
cg03272928	6.41e-06	-----	0.00215184	4	3357186	RGS12;RGS12	Body;Body	FALSE	Yes
cg18234520	6.45e-06	+++++	0.00216424	10	16807736	RSU1;RSU1	Body;Body	FALSE	Yes
cg26394982	6.46e-06	-----	0.00216657	17	7620111	DNAH2	TSS1500;TSS1500	FALSE	Yes
cg23499215	6.47e-06	----+	0.0021689	17	46800946	PRAC1;PRAC2;PRAC2	TSS1500;5'UTR;TSS200	FALSE	Yes
cg00601157	6.49e-06	+++++	0.00217458	3	47012985	CCDC12;CCDC12;CCDC12	Body;Body;Body	FALSE	Yes
cg16533901	6.5e-06	-----	0.00217485	8	57901234	IMPAD1	Body	FALSE	Yes
cg00052692	6.5e-06	+++++	0.00217485	12	122442863			FALSE	Yes
cg00568296	6.51e-06	+++++	0.00217718	20	48675540			FALSE	Yes
cg16466154	6.55e-06	-----	0.00218438	10	81964395	ANXA11;ANXA11;ANXA11;ANXA11;ANXA11;ANXA11	TSS200;5'UTR;5'UTR;5'UTR;5'UTR;5'UTR	FALSE	Yes
cg07838535	6.55e-06	-----	0.00218438	7	99718257	TAF6;TAF6;TAF6;CNPY4;TAF6	TSS1500;TSS1500;TSS1500;Body;TSS1500	FALSE	Yes
cg27185152	6.55e-06	+++++	0.00218438	7	36829993			FALSE	Yes
cg05822888	6.57e-06	-----	0.00219002	17	46656892	HOXB4	TSS1500	FALSE	Yes
cg17379926	6.58e-06	+++++	0.0021913	1	174934845	RABGAP1L;RABGAP1L	Body;Body	FALSE	Yes
cg11255674	6.65e-06	-----	0.00220943	4	87278973	MAPK10;MAPK10;MAPK10	5'UTR;5'UTR;5'UTR	FALSE	Yes
cg18922843	6.65e-06	-----	0.00220943	9	132359485			FALSE	Yes
cg13477948	6.66e-06	-----	0.00221172	16	75133648	ZNRF1	Body	FALSE	Yes
cg16475038	6.68e-06	-----	0.00221733	1	156719795	HDGF;HDGF;HDGF	Body;Body;Body	FALSE	Yes
cg17342483	6.69e-06	-----	0.00221754	18	74331820	LINC00683	Body	FALSE	Yes
cg07571438	6.69e-06	+++++	0.00221754	5	83477227	EDIL3	Body;Body	FALSE	Yes
cg11223753	6.69e-06	+++++	0.00221754	22	47525730	TBC1D22A;TBC1D22A;TBC1D22A;TBC1D22A;TBC1D22A	Body;Body;Body;Body;Body	FALSE	Yes
cg12169251	6.72e-06	-----	0.0022254	22	36755187	MYH9	5'UTR	FALSE	Yes
cg00039048	6.75e-06	-----	0.0022343	21	16423363	NRIP1	5'UTR	FALSE	Yes
cg23346933	6.78e-06	-----	0.00224318	6	46012788	CLIC5	Body	FALSE	Yes
cg23243690	6.82e-06	-----	0.00225432	12	109026944	SELPLG;SELPLG	TSS1500;5'UTR	FALSE	Yes
cg19664938	6.86e-06	-----	0.00226018	5	6493258	UBE2QL1	3'UTR	FALSE	Yes
cg21118749	6.87e-06	+++++	0.00226242	6	153042148	MYCT1	Body	FALSE	Yes
cg04687350	6.93e-06	-----	0.00227901	9	27108915	TEK;TEK;TEK	TSS1500;TSS1500;TSS1500	FALSE	Yes
cg11814438	6.94e-06	-----	0.00228124	17	6917600	RNASEK;RNASEK;RNASEK-C17orf49;RNASEK;C17orf49;C17orf49;C17orf49	Body;Body;Body;Body;TSS1500;TSS1500;TSS1500	FALSE	Yes
cg07473340	6.97e-06	+++++	0.00228793	7	26897522	SKAP2;SKAP2	TSS200;Body	FALSE	Yes
cg05731191	6.97e-06	+++++	0.00228793	8	143096469			FALSE	Yes
cg01434938	7e-06	+++++	0.00229565	14	50833146	CDKL1;CDKL1	Body;Body	FALSE	Yes
cg14130607	7.01e-06	-----	0.00229681	18	68089571			FALSE	Yes
cg25476554	7.08e-06	-----	0.00231654	12	102361726			FALSE	Yes
cg20670160	7.14e-06	+++++	0.00233295	2	189156621	GULP1;GULP1;GULP1;GULP1;GULP1;GULP1;GULP1;GULP1	TSS1500;TSS1500;1stExon;1stExon;1stExon;5'UTR;5'UTR;5'UTR	FALSE	Yes
cg21378582	7.15e-06	+++++	0.00233514	11	72470381	STARD10	Body	FALSE	Yes
cg02289180	7.17e-06	-----	0.00233952	4	154178264	TRIM2;TRIM2;TRIM2;TRIM2;TRIM2	TSS1500;5'UTR;Body;Body;Body	FALSE	Yes
cg00144480	7.19e-06	-----	0.0023439	2	40987580			FALSE	Yes
cg25430089	7.2e-06	-----	0.00234608	9	128525927	PBX3;PBX3;PBX3;PBX3	Body;Body;Body;Body	FALSE	Yes
cg00539226	7.22e-06	-----	0.00235152	17	48498045			FALSE	Yes
cg11180750	7.28e-06	----?	0.00236889	12	21283013	SLCO1B1	TSS1500	FALSE	Yes
cg00807189	7.29e-06	-----	0.00236997	8	120780022	TAF2	Body	FALSE	Yes
cg26209975	7.31e-06	+++++	0.00237539	14	66170994	FUT8;FUT8;FUT8;FUT8;FUT8	Body;Body;Body;Body;Body	FALSE	Yes
cg25038295	7.33e-06	---+-	0.0023808	16	72874571	ZFHX3;ZFHX3	Body;Body	FALSE	Yes
cg21171772	7.36e-06	+++++	0.00238509	10	98432447	PIK3AP1	Body	FALSE	Yes
cg04986097	7.39e-06	-----	0.00239372	5	40835623	RPL37	TSS1500	FALSE	Yes
cg19961045	7.49e-06	+++++	0.00241949	2	231074522	SP110;SP110;SP110;SP110	Body;Body;Body;Body	FALSE	Yes
cg20015040	7.51e-06	-----	0.00242485	6	138226252			FALSE	Yes
cg22330213	7.55e-06	-----	0.00243555	8	38153424	WHSC1L1	Body	FALSE	Yes
cg20502738	7.56e-06	-----	0.00243656	14	106331518			FALSE	Yes
cg07760125	7.57e-06	-----	0.00243868	17	41608097	ETV4;ETV4;ETV4;ETV4;ETV4	TSS1500;Body;Body;Body;Body	FALSE	Yes
cg01781762	7.66e-06	-----	0.00246209	16	30407502	ZNF48;ZNF48;ZNF48;ZNF48	5'UTR;Body;Body;Body	FALSE	Yes
cg16477213	7.7e-06	-----	0.00247382	8	142402816			FALSE	Yes
cg20344367	7.76e-06	+++++	0.00248972	5	406893	AHRR;AHRR	Body;Body	FALSE	Yes
cg13286857	7.83e-06	-----	0.00251105	5	66117949	MAST4;MAST4;MAST4	Body;Body;Body	FALSE	Yes
cg08036104	7.86e-06	+++++	0.00251953	22	31257590	OSBP2;OSBP2;OSBP2;OSBP2;OSBP2	Body;Body;Body;Body;5'UTR	FALSE	Yes
cg17750024	7.92e-06	-----	0.00253647	1	175538621	TNR	5'UTR	FALSE	Yes
cg19432791	7.98e-06	++-++	0.00255339	3	45894556	LZTFL1;LZTFL1	5'UTR;Body	FALSE	Yes
cg12773508	7.99e-06	+++++	0.00255544	21	38938119			FALSE	Yes
cg16545019	8e-06	+++++	0.00255748	9	14277484	NFIB;NFIB;NFIB	Body;Body;Body	FALSE	Yes
cg17373256	8.08e-06	-----	0.00257958	19	30113034			FALSE	Yes
cg12757443	8.11e-06	-----	0.00258683	6	33854523			FALSE	Yes
cg18667648	8.17e-06	-----	0.00260129	11	6626577	ILK;ILK;ILK;ILK;ILK	5'UTR;Body;Body;Body;Body	FALSE	Yes
cg21246584	8.17e-06	+++++	0.00260129	1	224753005			FALSE	Yes
cg21968153	8.24e-06	+++++	0.00262241	8	20880660			FALSE	Yes
cg27459180	8.25e-06	-----	0.00262441	17	45303104			FALSE	Yes
cg01792230	8.28e-06	-----	0.00263042	9	99374658	CDC14B;CDC14B	Body;Body	FALSE	Yes
cg01541424	8.28e-06	+++++	0.00263042	12	127874654			FALSE	Yes
cg26369930	8.36e-06	+++++	0.00264991	16	67475396	ATP6V0D1	Body	FALSE	Yes
cg10047182	8.38e-06	-----	0.00265152	21	38282489	HLCS;HLCS;HLCS	Body;Body;Body	FALSE	Yes
cg02654003	8.43e-06	-----	0.00266378	20	32810251			FALSE	Yes
cg13646880	8.44e-06	+++++	0.00266575	2	102685846	IL1R1	TSS1500	FALSE	Yes
cg14963666	8.45e-06	-----	0.00266773	2	209354581	PTH2R;PTH2R	Body;Body	FALSE	Yes
cg22249300	8.47e-06	+++++	0.00267166	9	135326868	C9orf171;C9orf171	Body;Body	FALSE	Yes
cg19409242	8.48e-06	-----	0.00267363	5	112312124	DCP2;DCP2;DCP2	TSS1500;TSS1500;TSS1500	FALSE	Yes
cg17913625	8.49e-06	+++++	0.00267441	3	38263930	OXSR1	Body	FALSE	Yes
cg04291124	8.5e-06	-----	0.00267519	1	90097848	LRRC8C;FLJ27354	TSS1500;Body	FALSE	Yes
cg09225720	8.52e-06	+++-+	0.00267911	5	80231701			FALSE	Yes
cg02011576	8.52e-06	+++++	0.00267911	3	38060265	PLCD1;PLCD1;PLCD1	Body;Body;Body	FALSE	Yes
cg06776359	8.54e-06	-----	0.00268184	6	43731041			FALSE	Yes
cg14538312	8.54e-06	+++++	0.00268184	2	64103608	UGP2;UGP2	Body;Body	FALSE	Yes
cg06217931	8.54e-06	+++++	0.00268184	19	5032919	KDM4B	Body	FALSE	Yes
cg19445047	8.55e-06	-----	0.00268379	1	229366634			FALSE	Yes
cg25781385	8.68e-06	+++++	0.00272219	6	5507831	FARS2	Body	FALSE	Yes
cg17803284	8.71e-06	-----	0.00273039	18	28682485	DSC2;DSCAS	TSS200;TSS200;Body	FALSE	Yes
cg25920590	8.77e-06	-----	0.00274436	8	29265970			FALSE	Yes
cg07268926	8.81e-06	-----	0.00275566	11	133821005	IGSF9B	Body	FALSE	Yes
cg10080808	8.82e-06	-----	0.00275757	8	37574987	LOC101929622	TSS200	FALSE	Yes
cg25178077	8.83e-06	-----	0.00275949	7	130682262	LINC-PINT;LINC-PINT;LINC-PINT;LINC-PINT;LINC-PINT;LINC-PINT;LINC-PINT;LINC-PINT	Body;Body;Body;Body;Body;Body;Body;Body	FALSE	Yes
cg09081665	8.85e-06	-----	0.00276452	4	84187982	COQ2	Body	FALSE	Yes
cg11789766	8.9e-06	+++-+	0.00277892	8	1721104	CLN8	Body	FALSE	Yes
cg20630344	8.93e-06	-----	0.00278583	16	80604078	LINC01227;LINC01227	Body;TSS1500	FALSE	Yes
cg08789713	8.95e-06	-----	0.00278962	21	34544414			FALSE	Yes
cg11427329	8.98e-06	-----	0.00279775	6	44190249	SLC29A1;SLC29A1;SLC29A1;SLC29A1;SLC29A1;SLC29A1	TSS1500;TSS1500;TSS1500;Body;Body;Body	FALSE	Yes
cg03822645	9.05e-06	+++++	0.00281462	7	95803300	SLC25A13;SLC25A13;SLC25A13	Body;Body;Body	FALSE	Yes
cg08298207	9.1e-06	-----	0.00282769	1	33337558	FNDC5;FNDC5;FNDC5	5'UTR;TSS1500;TSS1500	FALSE	Yes
cg20325131	9.12e-06	+++++	0.00283267	16	55689851	SLC6A2;SLC6A2;SLC6A2;SLC6A2	1stExon;5'UTR;TSS1500;TSS1500	FALSE	Yes
cg11613118	9.16e-06	-----	0.00284385	19	4586778			FALSE	Yes
cg14565721	9.29e-06	-----	0.00287792	19	38916488	RASGRP4;RASGRP4;RASGRP4;RASGRP4;RASGRP4;RASGRP4;RASGRP4	Body;Body;Body;Body;Body;Body;Body	FALSE	Yes
cg16916907	9.3e-06	-----	0.00287976	9	35811213	SPAG8;SPAG8	Body;Body	FALSE	Yes
cg24021101	9.38e-06	++++?	0.00289948	15	34620215	SLC12A6;SLC12A6;SLC12A6;SLC12A6;SLC12A6	Body;Body;Body;Body;Body	FALSE	Yes
cg14348932	9.39e-06	-----	0.00290131	7	45905370			FALSE	Yes
cg05745908	9.4e-06	-----	0.00290313	7	69330111	AUTS2;AUTS2;AUTS2	Body;Body;Body	FALSE	Yes
cg12517471	9.41e-06	-----	0.00290496	1	162147093	NOS1AP;NOS1AP	Body;Body	FALSE	Yes
cg04447623	9.51e-06	++-++	0.00293073	19	3516909	FZR1	5'UTR	FALSE	Yes
cg12767903	9.54e-06	-----	0.0029387	3	114027886	TIGIT	3'UTR	FALSE	Yes
cg02965553	9.61e-06	-----	0.0029577	15	41788349	ITPKA	Body	FALSE	Yes
cg21846220	9.66e-06	+++++	0.00297052	12	103836805	C12orf42;C12orf42;C12orf42;C12orf42;C12orf42	Body;Body;Body;5'UTR;5'UTR	FALSE	Yes
cg04487595	9.67e-06	-----	0.00297231	1	25346057			FALSE	Yes
cg21411014	9.68e-06	-----	0.00297281	12	4616445	C12orf4;C12orf4	Body;Body	FALSE	Yes
cg16213496	9.71e-06	-----	0.00297816	16	75316725			FALSE	Yes
cg14918424	9.8e-06	+++-+	0.00300317	8	121390870			FALSE	Yes
cg08924449	9.81e-06	-----	0.00300364	12	93770598	NUDT4;NUDT4;NUDT4P2;NUDT4P1;LOC643339	TSS1500;TSS1500;TSS1500;TSS1500;Body	FALSE	Yes
cg12465805	9.83e-06	-----	0.00300847	10	11214795	CELF2;CELF2;CELF2;CELF2	Body;Body;Body;Body	FALSE	Yes
cg07057251	9.85e-06	+++++	0.0030107	3	137689856			FALSE	Yes
cg19566482	9.9e-06	-----	0.00302253	11	33404678			FALSE	Yes
cg17361576	9.91e-06	+++++	0.00302253	18	67704103	RTTN	Body	FALSE	Yes
cg10692728	9.97e-06	-----	0.00303692	4	140872429	MAML3	Body	FALSE	Yes
cg08357961	9.99e-06	+++++	0.00304084	1	232126673	DISC1;DISC1;DISC1;DISC1;DISC1;DISC1;DISC1;TSNAX-DISC1	Body;Body;Body;Body;Body;Body;3'UTR;Body	FALSE	Yes
cg20821706	1e-05	-----	0.00304084	3	45208744			FALSE	Yes
cg16946894	1e-05	-----	0.00304084	18	21567344			FALSE	Yes
cg25055576	1.02e-05	-----	0.00309636	6	150903429			FALSE	Yes
cg10469399	1.02e-05	+++++	0.00309636	22	48028423	LINC00898;LOC284930	TSS1500;Body	FALSE	Yes
cg04346257	1.03e-05	-----	0.00312271	17	75430923	SEPT9;SEPT9;SEPT9;SEPT9;SEPT9;SEPT9;SEPT9	Body;Body;Body;Body;Body;Body;Body	FALSE	Yes
cg19120513	1.03e-05	-----	0.00312271	11	102189303	BIRC3;BIRC3	5'UTR;5'UTR	FALSE	Yes
cg13035650	1.04e-05	-----	0.00315034	4	37684781	RELL1;RELL1	Body;Body	FALSE	Yes
cg22062450	1.05e-05	+++++	0.00317386	22	46676933	TTC38	Body	FALSE	Yes
cg17252233	1.05e-05	+++++	0.00317386	7	132567403	CHCHD3	Body	FALSE	Yes
cg09406842	1.05e-05	+++++	0.00317386	1	46391593	MAST2	Body	FALSE	Yes
cg02402150	1.06e-05	-----	0.00319865	12	11787148			FALSE	Yes
cg22966967	1.06e-05	+++++	0.00319865	10	72977761	UNC5B-AS1;UNC5B;UNC5B	Body;Body;Body	FALSE	Yes
cg19093687	1.07e-05	-----	0.00322471	3	145874048	PLOD2;PLOD2	Body;Body	FALSE	Yes
cg21506132	1.07e-05	-----	0.00322471	1	210050607			FALSE	Yes
cg23612301	1.08e-05	-----	0.00325347	5	180675109	CTC-338M12.4	Body	FALSE	Yes
cg00407100	1.09e-05	-----	0.00327665	5	60954824	C5orf64;C5orf64;C5orf64;C5orf64	Body;Body;Body;Body	FALSE	Yes
cg07380641	1.09e-05	-----	0.00327665	20	48295033	B4GALT5	Body	FALSE	Yes
cg21204922	1.09e-05	+++++	0.00327665	5	168303088	SLIT3;SLIT3	Body;Body	FALSE	Yes
cg00963278	1.1e-05	+----	0.00329833	20	17946268	SNX5;SNX5;SNX5	Body;Body;5'UTR	FALSE	Yes
cg26303577	1.1e-05	+++++	0.00329833	20	4100417			FALSE	Yes
cg10217889	1.1e-05	+++-+	0.00329833	5	143172149			FALSE	Yes
cg15706574	1.1e-05	+++++	0.00329833	6	46231809	RCAN2;RCAN2;RCAN2	Body;Body;Body	FALSE	Yes
cg24425881	1.11e-05	-----	0.00332131	14	24821435			FALSE	Yes
cg18191116	1.11e-05	-----	0.00332131	14	81893507	STON2;STON2;STON2	1stExon;5'UTR;5'UTR	FALSE	Yes
cg00231618	1.12e-05	-----	0.00334841	6	36842207	C6orf89;PPIL1	5'UTR;Body	FALSE	Yes
cg17996394	1.12e-05	-----	0.00334841	19	4075484			FALSE	Yes
cg01955239	1.13e-05	-----	0.00337121	13	97646897	OXGR1	TSS1500	FALSE	Yes
cg10076152	1.13e-05	+++++	0.00337121	1	57773177	DAB1	5'UTR	FALSE	Yes
cg15654175	1.13e-05	+++++	0.00337121	21	47882193	DIP2A-IT1;DIP2A;DIP2A;DIP2A;DIP2A;DIP2A;DIP2A	TSS200;Body;Body;Body;Body;Body;Body	FALSE	Yes
cg10487714	1.13e-05	+++++	0.00337121	12	51322158	METTL7A	Body	FALSE	Yes
cg10312195	1.14e-05	-----	0.00338824	8	38559233			FALSE	Yes
cg26434485	1.14e-05	-----	0.00338824	11	44596668	CD82;CD82	5'UTR;5'UTR	FALSE	Yes
cg21885237	1.14e-05	+++++	0.00338824	20	20527298	RALGAPA2	Body	FALSE	Yes
cg03531140	1.14e-05	+++++	0.00338824	13	74644456	KLF12	5'UTR	FALSE	Yes
cg16671308	1.14e-05	+++-+	0.00338824	13	24733682	SPATA13;SPATA13;SPATA13	TSS1500;TSS1500;Body	FALSE	Yes
cg06337872	1.14e-05	+++++	0.00338824	5	31701905			FALSE	Yes
cg05684430	1.15e-05	-----	0.0034151	6	15400474	JARID2;JARID2	Body;5'UTR	FALSE	Yes
cg06747314	1.15e-05	+++++	0.0034151	1	154699263	KCNN3;KCNN3;KCNN3	Body;Body;Body	FALSE	Yes
cg05202858	1.16e-05	-----	0.00344048	3	191773926			FALSE	Yes
cg06021577	1.18e-05	-----	0.0034896	4	128887412	MFSD8;C4orf29	TSS1500;5'UTR	FALSE	Yes
cg02415897	1.18e-05	-----	0.0034896	7	24175120			FALSE	Yes
cg25973251	1.18e-05	+++++	0.0034896	19	39642170	PAK4;PAK4;PAK4;PAK4;PAK4	5'UTR;5'UTR;5'UTR;5'UTR;5'UTR	FALSE	Yes
cg27552005	1.19e-05	-----	0.00351332	1	70460098	LRRC7	Body	FALSE	Yes
cg06424429	1.19e-05	+++++	0.00351332	18	55597915			FALSE	Yes
cg22314617	1.2e-05	-----	0.00353403	17	74812693			FALSE	Yes
cg01235583	1.2e-05	-----	0.00353403	11	996011	AP2A2;AP2A2	Body;Body	FALSE	Yes
cg24630035	1.21e-05	-----	0.00356053	5	120389062			FALSE	Yes
cg27071325	1.22e-05	-----	0.00357515	1	17878413	ARHGEF10L	5'UTR	FALSE	Yes
cg12384562	1.22e-05	-----	0.00357515	2	205707683	PARD3B;PARD3B;PARD3B;PARD3B	Body;Body;Body;Body	FALSE	Yes
cg17924971	1.22e-05	-----	0.00357515	10	14647753	FAM107B;FAM107B;FAM107B;FAM107B	TSS1500;TSS1500;Body;5'UTR	FALSE	Yes
cg19368946	1.22e-05	-----	0.00357515	11	59057376			FALSE	Yes
cg10256405	1.23e-05	-----	0.00359851	2	105374275	LINC01114	TSS200	FALSE	Yes
cg16698186	1.23e-05	---+-	0.00359851	8	72836376	MSC-AS1;MSC-AS1	Body;Body	FALSE	Yes
cg08841318	1.23e-05	+++++	0.00359851	6	125283740	RNF217;RNF217-AS1	1stExon;Body	FALSE	Yes
cg21247398	1.24e-05	-----	0.0036218	7	151575277	PRKAG2-AS1;PRKAG2	Body;TSS1500	FALSE	Yes
cg12510140	1.24e-05	-----	0.0036218	16	66995006	CES3;CES3	TSS200;TSS200	FALSE	Yes
cg06036679	1.24e-05	-----	0.0036218	1	7246906	CAMTA1	Body	FALSE	Yes
cg14257621	1.25e-05	-----	0.00364203	1	109229812			FALSE	Yes
cg24702286	1.25e-05	--+--	0.00364203	20	49126382	PTPN1;PTPN1	TSS1500;TSS1500	FALSE	Yes
cg16517344	1.25e-05	-----	0.00364203	13	30512311	LINC00544	Body	FALSE	Yes
cg16998502	1.25e-05	+++++	0.00364203	18	71347435			FALSE	Yes
cg21996236	1.26e-05	-----	0.00366665	7	6654599	ZNF853	TSS1500	FALSE	Yes
cg07190151	1.26e-05	-----	0.00366665	5	58338574	PDE4D;PDE4D;PDE4D;PDE4D;PDE4D;PDE4D	Body;Body;Body;Body;Body;Body	FALSE	Yes
cg23767550	1.26e-05	-----	0.00366665	1	215740094	KCTD3	TSS1500	FALSE	Yes
cg10051928	1.27e-05	-----	0.00369122	5	75470980	SV2C;SV2C	Body;Body	FALSE	Yes
cg04897299	1.27e-05	-----	0.00369122	6	21402890			FALSE	Yes
cg07015947	1.27e-05	+++++	0.00369122	8	130744225			FALSE	Yes
cg07138998	1.28e-05	-----	0.00371268	13	50141957	RCBTB1	5'UTR	FALSE	Yes
cg08750806	1.29e-05	+++++	0.00373407	2	169594717	CERS6;CERS6	Body;Body	FALSE	Yes
cg25885098	1.29e-05	+++++	0.00373407	20	49431907	BCAS4;BCAS4;BCAS4	Body;Body;Body	FALSE	Yes
cg09215601	1.29e-05	+++++	0.00373407	1	198741194			FALSE	Yes
cg05470393	1.3e-05	-----	0.00375689	2	204801413	ICOS	TSS200	FALSE	Yes
cg04322026	1.31e-05	-----	0.0037781	10	4163881			FALSE	Yes
cg21636253	1.31e-05	-----	0.0037781	22	24685775	SPECC1L;SPECC1L;SPECC1L;SPECC1L-ADORA2A	5'UTR;5'UTR;5'UTR;Body	FALSE	Yes
cg04047535	1.31e-05	-----	0.0037781	19	16661208	SLC35E1	3'UTR	FALSE	Yes
cg23262190	1.31e-05	+++++	0.0037781	11	67438872	ALDH3B2;ALDH3B2	5'UTR;5'UTR	FALSE	Yes
cg02116244	1.31e-05	+++++	0.0037781	9	135320040	C9orf171;C9orf171	Body;Body	FALSE	Yes
cg00999947	1.32e-05	-----	0.00380385	7	75241074	HIP1;HIP1	Body;Body	FALSE	Yes
cg02481588	1.32e-05	-----	0.00380385	16	31153317	PRSS36;PRSS36;PRSS36	Body;Body;Body	FALSE	Yes
cg09070690	1.33e-05	-----	0.00382337	3	38875948			FALSE	Yes
cg08012149	1.33e-05	+++++	0.00382337	6	45503747	RUNX2;RUNX2;RUNX2	Body;Body;Body	FALSE	Yes
cg15417024	1.33e-05	+++++	0.00382337	1	33248746	YARS	Body	FALSE	Yes
cg03864568	1.34e-05	--+--	0.00384278	9	79015711			FALSE	Yes
cg08546724	1.34e-05	-----	0.00384278	1	118878149			FALSE	Yes
cg13277298	1.34e-05	+++++	0.00384278	2	232396420	NMUR1	TSS1500	FALSE	Yes
cg25250945	1.34e-05	++++?	0.00384278	11	112189944	LOC283140	Body	FALSE	Yes
cg09140487	1.35e-05	-----	0.00385744	6	6686014			FALSE	Yes
cg12595444	1.35e-05	-----	0.00385744	20	47356166	PREX1	Body	FALSE	Yes
cg07959027	1.35e-05	+++++	0.00385744	8	11351835	BLK;BLK	1stExon;5'UTR	FALSE	Yes
cg00690544	1.36e-05	-----	0.00388133	19	36618552			FALSE	Yes
cg00775909	1.36e-05	+++++	0.00388133	11	113935051	ZBTB16;ZBTB16	Body;Body	FALSE	Yes
cg05906993	1.37e-05	-----	0.00390047	8	59231096			FALSE	Yes
cg14972510	1.37e-05	-----	0.00390047	8	38042155	BAG4;BAG4	Body;Body	FALSE	Yes
cg05978446	1.39e-05	-----	0.00394476	17	7340888	FGF11;TMEM102;FGF11	TSS1500;3'UTR;TSS1500	FALSE	Yes
cg04771042	1.39e-05	-----	0.00394476	8	22411778	SORBS3	5'UTR	FALSE	Yes
cg23435661	1.4e-05	-----	0.00396522	14	68699723	RAD51B;RAD51B;RAD51B	Body;Body;Body	FALSE	Yes
cg08867705	1.4e-05	+++++	0.00396522	1	42147810	HIVEP3;HIVEP3	5'UTR;5'UTR	FALSE	Yes
cg23595172	1.4e-05	+++++	0.00396522	11	12116797			FALSE	Yes
cg01763364	1.41e-05	-----	0.00399036	1	65388098	JAK1	5'UTR	FALSE	Yes
cg06748804	1.42e-05	-----	0.00401546	7	107515453			FALSE	Yes
cg26030431	1.42e-05	-----	0.00401546	5	105712718			FALSE	Yes
cg17521795	1.44e-05	-----	0.00406232	16	30545145	ZNF747;ZNF747;ZNF747;ZNF747	Body;Body;Body;Body	FALSE	Yes
cg08516596	1.44e-05	+++++	0.00406232	6	157148738	ARID1B;ARID1B	Body;Body	FALSE	Yes
cg15794184	1.45e-05	+++++	0.00408566	1	174933932	RABGAP1L;RABGAP1L;RABGAP1L	5'UTR;1stExon;Body	FALSE	Yes
cg17398329	1.45e-05	+++++	0.00408566	11	129751683	NFRKB;NFRKB	Body;Body	FALSE	Yes
cg05285969	1.46e-05	-----	0.00410895	12	48287729	VDR;VDR;VDR	Body;5'UTR;5'UTR	FALSE	Yes
cg21837025	1.47e-05	-----	0.00412565	7	101447905			FALSE	Yes
cg03178303	1.47e-05	+++++	0.00412565	2	70026011	ANXA4	Body	FALSE	Yes
cg23850466	1.47e-05	+++++	0.00412565	12	26340474			FALSE	Yes
cg15294489	1.5e-05	-----	0.00419658	6	166050044	PDE10A;PDE10A	Body;5'UTR	FALSE	Yes
cg12492197	1.51e-05	-----	0.00421957	1	45273007	BTBD19;TCTEX1D4	TSS1500;TSS200	FALSE	Yes
cg19628958	1.52e-05	-----	0.00424418	1	112903196			FALSE	Yes
cg08660021	1.52e-05	+++++	0.00424418	3	126928138			FALSE	Yes
cg22516649	1.53e-05	----?	0.00426707	8	97718934	CPQ	5'UTR	FALSE	Yes
cg16368519	1.53e-05	-----	0.00426707	7	872104	SUN1;SUN1;SUN1;SUN1;SUN1	TSS200;5'UTR;5'UTR;5'UTR;Body	FALSE	Yes
cg02023986	1.54e-05	-----	0.00428654	1	15668855	FHAD1	Body	FALSE	Yes
cg11508942	1.54e-05	---+-	0.00428654	16	3108076	MMP25;MMP25-AS1	Body;Body	FALSE	Yes
cg23111696	1.54e-05	+++++	0.00428654	1	41626466	SCMH1;SCMH1;SCMH1;SCMH1;SCMH1;SCMH1;SCMH1	5'UTR;TSS1500;5'UTR;Body;5'UTR;5'UTR;5'UTR	FALSE	Yes
cg12569593	1.55e-05	-----	0.00430594	11	126413716	KIRREL3;KIRREL3;KIRREL3	Body;Body;Body	FALSE	Yes
cg25896883	1.55e-05	-----	0.00430594	2	190272670			FALSE	Yes
cg23608915	1.55e-05	+++++	0.00430594	2	102333795	MAP4K4;MAP4K4;MAP4K4;MAP4K4;MAP4K4	Body;Body;Body;Body;Body	FALSE	Yes
cg03354908	1.55e-05	+++++	0.00430594	18	21243559	ANKRD29;ANKRD29	TSS1500;TSS1500	FALSE	Yes
cg15546324	1.57e-05	-----	0.00435299	9	134305261	PRRC2B	TSS1500	FALSE	Yes
cg05954228	1.58e-05	-----	0.00437388	17	72509125			FALSE	Yes
cg00592995	1.59e-05	+++-+	0.00439643	20	56196368	ZBP1;ZBP1;ZBP1;ZBP1	TSS1500;TSS1500;TSS1500;TSS1500	FALSE	Yes
cg07062809	1.59e-05	++-++	0.00439643	22	35709765	TOM1;TOM1;TOM1;TOM1;TOM1;TOM1	5'UTR;Body;Body;Body;Body;Body	FALSE	Yes
cg14177623	1.59e-05	+++++	0.00439643	3	173629411	NLGN1-AS1;NLGN1	Body;Body	FALSE	Yes
cg01057741	1.6e-05	-----	0.00441892	20	61639324	BHLHE23;LOC63930	TSS1500;TSS1500	FALSE	Yes
cg08349425	1.6e-05	-----	0.00441892	2	233157832	DIS3L2;DIS3L2;DIS3L2;DIS3L2	Body;Body;Body;Body	FALSE	Yes
cg14019706	1.61e-05	-----	0.00443963	5	139080266			FALSE	Yes
cg27199725	1.61e-05	+++++	0.00443963	3	4697732	ITPR1;ITPR1;ITPR1	Body;Body;Body	FALSE	Yes
cg24467927	1.62e-05	-----	0.00445338	10	102279786	SEC31B	TSS200	FALSE	Yes
cg13084877	1.62e-05	-----	0.00445338	15	31617627	KLF13;KLF13	TSS1500;TSS1500	FALSE	Yes
cg13289509	1.62e-05	-----	0.00445338	10	105519104	SH3PXD2A	Body	FALSE	Yes
cg12258998	1.64e-05	-----	0.00449098	2	18742146	RDH14;NT5C1B-RDH14;NT5C1B-RDH14	TSS200;Body;Body	FALSE	Yes
cg02302956	1.64e-05	-----	0.00449098	6	11713286			FALSE	Yes
cg14410487	1.64e-05	+++++	0.00449098	22	38396083	POLR2F;POLR2F	Body;Body	FALSE	Yes
cg22795426	1.65e-05	-----	0.00451662	11	57193487	SLC43A3;SLC43A3;SLC43A3;SLC43A3;SLC43A3	Body;Body;Body;Body;Body	FALSE	Yes
cg15833425	1.66e-05	-----	0.004537	X	106728246			FALSE	Yes
cg27325787	1.66e-05	+++++	0.004537	16	23960325	PRKCB;PRKCB	Body;Body	FALSE	Yes
cg10373905	1.66e-05	+++++	0.004537	1	247488494	ZNF496	Body	FALSE	Yes
cg05985907	1.67e-05	-----	0.00455732	14	77606673	ZDHHC22	5'UTR	FALSE	Yes
cg20766052	1.67e-05	-----	0.00455732	6	14744370			FALSE	Yes
cg00237547	1.68e-05	-----	0.00457933	14	106385493	KIAA0125	Body	FALSE	Yes
cg26905523	1.68e-05	-----	0.00457933	12	124942692	NCOR2;NCOR2;NCOR2	Body;Body;Body	FALSE	Yes
cg08914946	1.68e-05	+++++	0.00457933	1	28925778			FALSE	Yes
cg07572451	1.69e-05	-----	0.00459776	3	160168238	TRIM59	TSS1500	FALSE	Yes
cg01440687	1.69e-05	-----	0.00459776	14	43011017			FALSE	Yes
cg25504129	1.7e-05	+++++	0.0046126	3	15337162	SH3BP5;SH3BP5	Body;5'UTR	FALSE	Yes
cg18628968	1.7e-05	+++++	0.0046126	12	43719927			FALSE	Yes
cg03146937	1.7e-05	+++++	0.0046126	11	13244914			FALSE	Yes
cg14085095	1.71e-05	-----	0.00463266	X	68062449			FALSE	Yes
cg15317464	1.71e-05	+++-+	0.00463266	2	9105414	MBOAT2	Body	FALSE	Yes
cg17691171	1.72e-05	-----	0.00465442	3	187464034	BCL6	TSS1500	FALSE	Yes
cg17350345	1.72e-05	-----	0.00465442	9	137558909	COL5A1;COL5A1	Body;Body	FALSE	Yes
cg22076542	1.73e-05	+++++	0.00467259	11	10846837			FALSE	Yes
cg01919189	1.74e-05	-----	0.00469424	11	120976795	TECTA	Body	FALSE	Yes
cg10250335	1.74e-05	-----	0.00469424	8	80745965	LOC101927040	Body	FALSE	Yes
cg05535138	1.75e-05	----?	0.00471406	4	48371060	SLAIN2	Body	FALSE	Yes
cg10228719	1.75e-05	-----	0.00471406	9	99146362	SLC35D2;SLC35D2;SLC35D2	TSS1500;TSS1500;TSS1500	FALSE	Yes
cg12818408	1.75e-05	+++++	0.00471406	9	131690369	PHYHD1;PHYHD1;PHYHD1	Body;Body;Body	FALSE	Yes
cg27648147	1.76e-05	----?	0.00473561	7	14731383	DGKB;DGKB	Body;Body	FALSE	Yes
cg02062196	1.76e-05	+----	0.00473561	20	50722929	ZFP64	Body	FALSE	Yes
cg09865488	1.76e-05	-----	0.00473561	7	2996642	CARD11	Body	FALSE	Yes
cg05115902	1.77e-05	-----	0.00475171	17	13923193			FALSE	Yes
cg15830600	1.77e-05	-----	0.00475171	9	95739108	FGD3;FGD3;FGD3	Body;Body;Body	FALSE	Yes
cg03540917	1.77e-05	+++++	0.00475171	4	57686587	SPINK2;SPINK2;SPINK2;SPINK2;SPINK2;SPINK2;SPINK2;SPINK2;SPINK2	Body;Body;Body;Body;Body;Body;Body;Body;Body	FALSE	Yes
cg06731983	1.78e-05	-----	0.00477495	11	68911676			FALSE	Yes
cg01874783	1.79e-05	+++++	0.00479634	11	57413404	YPEL4	3'UTR	FALSE	Yes
cg15626731	1.79e-05	+++++	0.00479634	11	7559406	PPFIBP2	5'UTR	FALSE	Yes
cg03840432	1.81e-05	+++-+	0.00483716	1	67955456			FALSE	Yes
cg15410025	1.81e-05	+++++	0.00483716	7	2727040	AMZ1;AMZ1	TSS1500;5'UTR	FALSE	Yes
cg02058400	1.82e-05	-----	0.00484929	6	112337835			FALSE	Yes
cg09986153	1.82e-05	+++-+	0.00484929	8	28893138	HMBOX1;HMBOX1	Body;Body	FALSE	Yes
cg13306032	1.82e-05	+++++	0.00484929	21	21632374			FALSE	Yes
cg04890026	1.83e-05	-----	0.00486499	18	74842101	MBP;MBP	5'UTR;5'UTR	FALSE	Yes
cg07931865	1.83e-05	+++++	0.00486499	15	41069166	DNAJC17	Body	FALSE	Yes
cg13385981	1.83e-05	+++++	0.00486499	12	50457045	ASIC1;ASIC1;ASIC1	Body;Body;Body	FALSE	Yes
cg06814146	1.83e-05	++++-	0.00486499	1	206898680	MAPKAPK2;MAPKAPK2	Body;Body	FALSE	Yes
cg09222890	1.85e-05	-----	0.00489799	12	6494180	LTBR;LTBR;LTBR;LTBR	Body;ExonBnd;ExonBnd;Body	FALSE	Yes
cg24035417	1.85e-05	+++++	0.00489799	22	43654240	SCUBE1;SCUBE1	ExonBnd;Body	FALSE	Yes
cg17675263	1.86e-05	-----	0.00491714	8	49533579	LOC101929217;LOC101929268	Body;Body	FALSE	Yes
cg11265106	1.86e-05	--+--	0.00491714	8	93526766			FALSE	Yes
cg01568402	1.87e-05	-----	0.00493439	3	64074407	LINC00994;PRICKLE2-AS1	TSS1500;Body	FALSE	Yes
cg08996955	1.87e-05	+++++	0.00493439	9	135320018	C9orf171;C9orf171	Body;Body	FALSE	Yes
cg20851540	1.88e-05	-----	0.00495525	11	5647018	TRIM34;TRIM34;TRIM6-TRIM34	5'UTR;5'UTR;Body	FALSE	Yes
cg16342538	1.89e-05	-----	0.00497792	2	31607367	XDH	Body	FALSE	Yes
cg19553615	1.9e-05	-----	0.0049987	15	91208523	CRTC3-AS1	Body	FALSE	Yes
cg02362841	1.91e-05	-----	0.00501757	4	92679779			FALSE	Yes
cg26161297	1.91e-05	-----	0.00501757	6	17741759			FALSE	Yes
cg15779457	1.91e-05	+++++	0.00501757	1	244481810			FALSE	Yes
cg13978081	1.92e-05	+++++	0.00504011	6	116952796	RSPH4A;RSPH4A	Body;Body	FALSE	Yes
cg14193434	1.92e-05	+++++	0.00504011	13	67802884	PCDH9;PCDH9	5'UTR;5'UTR	FALSE	Yes
cg13924921	1.93e-05	+++++	0.00506262	6	25002968	FAM65B	Body	FALSE	Yes
cg19491427	1.94e-05	-----	0.00507947	11	18549103	TSG101	TSS1500	FALSE	Yes
cg26157453	1.94e-05	-----	0.00507947	20	31555148			FALSE	Yes
cg24642843	1.94e-05	-----	0.00507947	1	20577410			FALSE	Yes
cg02284258	1.94e-05	+++++	0.00507947	16	73017982	ZFHX3;ZFHX3	5'UTR;5'UTR	FALSE	Yes
cg05812200	1.94e-05	+++++	0.00507947	4	16463145			FALSE	Yes
cg16915469	1.96e-05	-----	0.00512617	21	45534050	PWP2;PWP2	ExonBnd;Body	FALSE	Yes
cg16475993	1.96e-05	-----	0.00512617	3	98283745			FALSE	Yes
cg08718870	1.98e-05	-----	0.00516707	1	45008337	RNF220	Body	FALSE	Yes
cg23175240	1.98e-05	-----	0.00516707	1	202208568	LGR6;LGR6;LGR6	Body;Body;Body	FALSE	Yes
cg19321522	1.98e-05	+++++	0.00516707	2	216483918	LINC00607	Body	FALSE	Yes
cg10611365	1.99e-05	-----	0.00518174	8	21911974	DMTN	TSS1500;TSS1500;TSS1500;5'UTR	FALSE	Yes
cg16531578	1.99e-05	-----	0.00518174	6	42370098	TRERF1;TRERF1	5'UTR;5'UTR	FALSE	Yes
cg02129236	2e-05	-----	0.00520206	14	38759937			FALSE	Yes
cg26560969	2e-05	-----	0.00520206	2	80277732	CTNNA2;CTNNA2;CTNNA2;CTNNA2	Body;Body;Body;Body	FALSE	Yes
cg14261336	2e-05	+++++	0.00520206	10	73946374	ASCC1;ASCC1;ASCC1;ASCC1	Body;Body;Body;Body	FALSE	Yes
cg25342736	2.01e-05	-----	0.00522042	10	71605770	COL13A1;COL13A1;COL13A1;COL13A1;COL13A1;COL13A1	Body;Body;Body;Body;Body;Body	FALSE	Yes
cg21324771	2.01e-05	-----	0.00522042	11	120895891	TBCEL;TBCEL	5'UTR;5'UTR	FALSE	Yes
cg10814722	2.02e-05	-----	0.00524256	4	25865415	SEL1L3;SEL1L3;SEL1L3	TSS1500;TSS200;TSS200	FALSE	Yes
cg23056675	2.03e-05	-----	0.00525699	4	40991730	APBB2;APBB2;APBB2	Body;Body;Body	FALSE	Yes
cg06011000	2.03e-05	-----	0.00525699	20	35722944	RBL1;RBL1	Body;Body	FALSE	Yes
cg27588577	2.03e-05	+++++	0.00525699	6	160449530	IGF2R	Body	FALSE	Yes
cg02624377	2.04e-05	-----	0.00527711	2	223269006			FALSE	Yes
cg08374625	2.04e-05	+++++	0.00527711	2	102004417	CREG2	TSS1500	FALSE	Yes
cg17157356	2.05e-05	----+	0.00530105	20	32441411	CHMP4B	3'UTR	FALSE	Yes
cg26484964	2.06e-05	-----	0.00532497	4	38916609	FAM114A1;FAM114A1	Body;Body	FALSE	Yes
cg16005926	2.07e-05	-----	0.00534304	1	84711119			FALSE	Yes
cg11519114	2.08e-05	-----	0.00536496	4	25862037	SEL1L3;SEL1L3;SEL1L3	5'UTR;Body;Body	FALSE	Yes
cg13937163	2.1e-05	+++++	0.00541065	6	112356900			FALSE	Yes
cg11888921	2.11e-05	-----	0.00542854	12	106529681	NUAK1	Body	FALSE	Yes
cg12614504	2.11e-05	-----	0.00542854	15	58477854	AQP9	3'UTR	FALSE	Yes
cg20201647	2.13e-05	-----	0.00547009	17	7118944	ACADVL;DLG4;DLG4	TSS1500;Body;Body	FALSE	Yes
cg15198407	2.13e-05	-----	0.00547009	10	80841737	ZMIZ1	5'UTR	FALSE	Yes
cg03096310	2.13e-05	-----	0.00547009	6	106035279			FALSE	Yes
cg12467416	2.14e-05	-----	0.00548585	17	75361975	SEPT9;SEPT9;SEPT9;SEPT9	Body;Body;5'UTR;Body	FALSE	Yes
cg08084103	2.14e-05	--+--	0.00548585	22	31692449			FALSE	Yes
cg00073565	2.14e-05	+++++	0.00548585	8	106462708	ZFPM2	Body	FALSE	Yes
cg07422492	2.14e-05	+++++	0.00548585	2	149793455	KIF5C	Body	FALSE	Yes
cg01804048	2.18e-05	-----	0.0055723	17	80292029	SECTM1	TSS200	FALSE	Yes
cg04390141	2.19e-05	+++++	0.00559384	3	191045992	CCDC50;CCDC50;UTS2B	TSS1500;TSS1500;5'UTR	FALSE	Yes
cg13462850	2.2e-05	-----	0.00561534	6	170252203			FALSE	Yes
cg25856368	2.21e-05	-----	0.00563479	12	125401010	UBC	TSS1500	FALSE	Yes
cg16025709	2.21e-05	+++-+	0.00563479	9	140523011	EHMT1	Body;Body	FALSE	Yes
cg13163839	2.22e-05	++++?	0.00565218	2	158768696			FALSE	Yes
cg25483734	2.22e-05	++++?	0.00565218	11	67448973	ALDH3B2	TSS1500	FALSE	Yes
cg17449107	2.24e-05	+++++	0.00569086	12	105014903	CHST11;CHST11	Body;Body	FALSE	Yes
cg10830544	2.25e-05	-----	0.00570606	1	180554833			FALSE	Yes
cg08127131	2.25e-05	-----	0.00570606	4	141159423			FALSE	Yes
cg26591047	2.26e-05	+++++	0.00572325	13	30748617			FALSE	Yes
cg26262644	2.27e-05	+----	0.00574243	15	74214246	LOXL1-AS1;LOXL1-AS1;LOXL1-AS1;LOXL1-AS1;LOXL1-AS1	Body;Body;Body;Body;Body	FALSE	Yes
cg10164401	2.27e-05	++++?	0.00574243	12	55943708	OR6C4	TSS1500	FALSE	Yes
cg20499714	2.28e-05	-----	0.00576362	12	78140169			FALSE	Yes
cg02660182	2.29e-05	-----	0.00578067	9	123253727	CDK5RAP2;CDK5RAP2;CDK5RAP2;CDK5RAP2;CDK5RAP2;CDK5RAP2;CDK5RAP2;CDK5RAP2	Body;Body;Body;Body;Body;Body;Body;Body	FALSE	Yes
cg05972906	2.29e-05	-----	0.00578067	1	54972528			FALSE	Yes
cg02254135	2.3e-05	-----	0.00579973	20	18341502			FALSE	Yes
cg15446156	2.32e-05	-----	0.0058398	22	25465883	KIAA1671	Body	FALSE	Yes
cg08314652	2.32e-05	-----	0.0058398	14	106285075			FALSE	Yes
cg20764603	2.32e-05	-----	0.0058398	16	30672510	FBRS;FBRS	Body;ExonBnd	FALSE	Yes
cg01353012	2.33e-05	-----	0.00585874	17	49027377			FALSE	Yes
cg15951740	2.33e-05	-----	0.00585874	12	46660255	SLC38A1;SLC38A1;SLC38A1;SLC38A1;SLC38A1;SLC38A1;SLC38A1	1stExon;5'UTR;5'UTR;5'UTR;5'UTR;5'UTR;5'UTR	FALSE	Yes
cg02160272	2.33e-05	-----	0.00585874	10	112185666			FALSE	Yes
cg14893902	2.36e-05	-----	0.00592579	8	120627704	ENPP2;ENPP2;ENPP2	Body;Body;Body	FALSE	Yes
cg16727193	2.37e-05	-----	0.00594879	3	126627910	CHCHD6	Body	FALSE	Yes
cg00320779	2.38e-05	----?	0.00595915	3	166106211			FALSE	Yes
cg26142265	2.38e-05	-----	0.00595915	1	149909433	MTMR11;MTMR11	TSS1500;TSS1500	FALSE	Yes
cg22823725	2.38e-05	-----	0.00595915	2	192900649	TMEFF2;TMEFF2	Body;Body	FALSE	Yes
cg22692692	2.38e-05	+++++	0.00595915	3	194432892	LOC100507391	Body	FALSE	Yes
cg12959030	2.38e-05	+++++	0.00595915	8	118690518			FALSE	Yes
cg10001455	2.39e-05	-----	0.00597366	5	111195742	NREP;NREP	Body;Body	FALSE	Yes
cg06589222	2.39e-05	-----	0.00597366	1	41446660	CTPS1;CTPS1	5'UTR;Body	FALSE	Yes
cg15700829	2.39e-05	-----	0.00597366	1	42132921	HIVEP3;HIVEP3	5'UTR;5'UTR	FALSE	Yes
cg16902945	2.41e-05	+++++	0.0060173	10	6959383			FALSE	Yes
cg05476493	2.41e-05	+++++	0.0060173	6	112552771	LAMA4;LAMA4;LAMA4	Body;Body;Body	FALSE	Yes
cg04326084	2.42e-05	-----	0.00603802	7	84002153			FALSE	Yes
cg11514736	2.43e-05	++++?	0.00605659	14	52328008	GNG2;GNG2;GNG2	5'UTR;5'UTR;5'UTR	FALSE	Yes
cg06174706	2.44e-05	+++++	0.00607512	19	1909668	ADAT3;SCAMP4	5'UTR;5'UTR	FALSE	Yes
cg15609561	2.45e-05	+++++	0.00609575	11	71085444			FALSE	Yes
cg08018468	2.46e-05	-----	0.00611206	1	43768048	TIE1;TIE1	Body;Body	FALSE	Yes
cg09516805	2.46e-05	-----	0.00611206	13	49107564	RCBTB2;RCBTB2;RCBTB2;RCBTB2	TSS200;TSS200;TSS200;TSS200	FALSE	Yes
cg04179000	2.46e-05	-----	0.00611206	14	23342291	LRP10	Body	FALSE	Yes
cg07790294	2.47e-05	+++++	0.00613048	19	928287	ARID3A	5'UTR	FALSE	Yes
cg01475205	2.49e-05	-----	0.00616719	11	64412026	NRXN2;NRXN2;NRXN2	TSS1500;Body;Body	FALSE	Yes
cg07242524	2.49e-05	-----	0.00616719	15	31623225	KLF13;KLF13	Body;Body	FALSE	Yes
cg06275482	2.5e-05	-----	0.00618118	22	37882875	MFNG;MFNG;MFNG	TSS1500;TSS1500;TSS1500	FALSE	Yes
cg00075986	2.5e-05	+++++	0.00618118	10	130177649			FALSE	Yes
cg23710031	2.5e-05	+++++	0.00618118	12	57933085	DCTN2;DCTN2;DCTN2	Body;Body;Body	FALSE	Yes
cg19665163	2.51e-05	-----	0.00619943	10	17641760	HACD1	Body	FALSE	Yes
cg13058697	2.51e-05	-----	0.00619943	2	216945999	TMEM169;TMEM169;TMEM169;TMEM169;PECR	TSS1500;TSS1500;TSS1500;TSS1500;Body	FALSE	Yes
cg08525643	2.52e-05	-----	0.00622196	4	1580307			FALSE	Yes
cg13545705	2.53e-05	-----	0.00624232	16	67312573	PLEKHG4;PLEKHG4;PLEKHG4;PLEKHG4	TSS1500;TSS1500;TSS1500;5'UTR	FALSE	Yes
cg23398478	2.53e-05	-----	0.00624232	12	53575373	ZNF740;CSAD;CSAD	5'UTR;TSS1500;TSS1500	FALSE	Yes
cg07958818	2.55e-05	-----	0.00628075	1	19767194	CAPZB;CAPZB;CAPZB;CAPZB	Body;Body;Body;Body	FALSE	Yes
cg25367572	2.55e-05	-----	0.00628075	3	52926875	TMEM110-MUSTN1;TMEM110	Body;Body	FALSE	Yes
cg01135863	2.55e-05	+++++	0.00628075	4	17788258			FALSE	Yes
cg00854187	2.56e-05	+++++	0.00630102	13	28040639			FALSE	Yes
cg06305933	2.57e-05	+++++	0.00631469	20	2511197			FALSE	Yes
cg00317353	2.58e-05	+----	0.0063305	7	43908110	URGCP-MRPS24;MRPS24	3'UTR;Body	FALSE	Yes
cg07153441	2.58e-05	+++++	0.0063305	12	53004142	KRT73-AS1;KRT73	Body;Body	FALSE	Yes
cg23643450	2.62e-05	-----	0.00641093	1	204592576	LRRN2;LRRN2	5'UTR;5'UTR	FALSE	Yes
cg00205522	2.63e-05	+++++	0.00643097	4	5814803	EVC;EVC	3'UTR;3'UTR	FALSE	Yes
cg08368948	2.64e-05	-----	0.00644876	12	53049710			FALSE	Yes
cg06132685	2.64e-05	-----	0.00644876	6	57499715	PRIM2	Body	FALSE	Yes
cg01077851	2.64e-05	-----	0.00644876	2	235392956			FALSE	Yes
cg22385325	2.65e-05	-----	0.00646652	11	66094077			FALSE	Yes
cg09439276	2.65e-05	+++++	0.00646652	16	66554515	TK2;TK2;TK2;TK2;TK2;TK2;TK2;TK2	Body;Body;Body;Body;Body;Body;Body;Body	FALSE	Yes
cg07412470	2.65e-05	+++++	0.00646652	7	128735362			FALSE	Yes
cg04059519	2.66e-05	-----	0.00648646	5	73618081	LINC01333	TSS1500	FALSE	Yes
cg24832862	2.67e-05	-----	0.00650638	11	60138281			FALSE	Yes
cg12407708	2.67e-05	-----	0.00650638	7	45024931	SNHG15	Body	FALSE	Yes
cg09566177	2.69e-05	-----	0.00655062	3	39448944	RPSA;RPSA;SNORA6	5'UTR;5'UTR;TSS1500	FALSE	Yes
cg27188994	2.71e-05	+++++	0.00659481	10	34869729	PARD3;PARD3;PARD3;PARD3;PARD3;PARD3;PARD3;PARD3;PARD3;PARD3;PARD3	Body;Body;Body;Body;Body;Body;Body;Body;Body;Body;Body	FALSE	Yes
cg13302530	2.72e-05	+++++	0.00661688	16	13399053			FALSE	Yes
cg21825848	2.74e-05	-----	0.00664959	2	164657835			FALSE	Yes
cg02807047	2.74e-05	+++++	0.00664959	5	65850214			FALSE	Yes
cg12781632	2.75e-05	-----	0.0066602	13	49061160			FALSE	Yes
cg14585799	2.76e-05	-----	0.00667532	11	75060876	ARRB1;ARRB1	Body;Body	FALSE	Yes
cg07955370	2.76e-05	+++++	0.00667532	12	104670185	TXNRD1	Body	FALSE	Yes
cg10042876	2.77e-05	-----	0.00668812	11	117856639	IL10RA;IL10RA	TSS1500;TSS1500	FALSE	Yes
cg10265982	2.77e-05	+++++	0.00668812	1	6837223			FALSE	Yes
cg00962991	2.78e-05	-----	0.00670315	7	34361199			FALSE	Yes
cg00706656	2.78e-05	-----	0.00670315	5	72411646			FALSE	Yes
cg11939713	2.78e-05	-----	0.00670315	21	16513092			FALSE	Yes
cg16872563	2.78e-05	-----	0.00670315	20	48247736			FALSE	Yes
cg05072629	2.79e-05	-----	0.0067227	7	108291071			FALSE	Yes
cg07976851	2.79e-05	-----	0.0067227	10	121417992	BAG3	Body	FALSE	Yes
cg20982711	2.81e-05	-----	0.00675256	11	118971893	DPAGT1	Body	FALSE	Yes
cg11108080	2.81e-05	++++?	0.00675256	11	35380439	SLC1A2;SLC1A2;SLC1A2	Body;5'UTR;5'UTR	FALSE	Yes
cg25025836	2.82e-05	-----	0.0067743	11	19799182	NAV2;NAV2;NAV2;NAV2	Body;Body;Body;Body	FALSE	Yes
cg12471790	2.84e-05	-----	0.00680853	7	130698202	LINC-PINT;LINC-PINT;LINC-PINT;LINC-PINT;LINC-PINT;LINC-PINT;LINC-PINT;LINC-PINT	Body;Body;Body;Body;Body;Body;Body;Body	FALSE	Yes
cg00919987	2.84e-05	-----	0.00680853	12	118811621	TAOK3	TSS1500	FALSE	Yes
cg02699612	2.84e-05	-----	0.00680853	10	115513280	PLEKHS1;PLEKHS1;PLEKHS1	5'UTR;5'UTR;5'UTR	FALSE	Yes
cg10515688	2.84e-05	+++++	0.00680853	17	30844512	MYO1D	Body	FALSE	Yes
cg00389253	2.84e-05	+++++	0.00680853	X	23422137			FALSE	Yes
cg09842728	2.84e-05	+++++	0.00680853	9	137208893			FALSE	Yes
cg03078557	2.86e-05	-----	0.00684493	1	162255039	NOS1AP;NOS1AP	Body;Body	FALSE	Yes
cg22653615	2.88e-05	+++++	0.00688816	17	30161804			FALSE	Yes
cg10433965	2.89e-05	-----	0.0069051	7	114562008	MDFIC;MDFIC;MDFIC	TSS200;TSS200;TSS200	FALSE	Yes
cg14283438	2.89e-05	-----	0.0069051	5	79421589	SERINC5;SERINC5;SERINC5;SERINC5	Body;Body;Body;Body	FALSE	Yes
cg25997474	2.9e-05	-----	0.00692666	4	100273969	ADH1C;ADH1C	1stExon;5'UTR	FALSE	Yes
cg03877706	2.91e-05	-----	0.00693888	21	22572632	NCAM2	Body	FALSE	Yes
cg22916270	2.91e-05	-----	0.00693888	11	6634465	TAF10;TPP1	TSS1500;3'UTR	FALSE	Yes
cg04256891	2.91e-05	+++++	0.00693888	2	97440190	CNNM4	Body	FALSE	Yes
cg19009776	2.91e-05	+++++	0.00693888	1	41810054			FALSE	Yes
cg07986500	2.93e-05	-----	0.0069772	3	108305798	KIAA1524	Body	FALSE	Yes
cg26811832	2.93e-05	+++++	0.0069772	13	67802655	PCDH9;PCDH9	5'UTR;5'UTR	FALSE	Yes
cg21819305	2.94e-05	+++++	0.00699164	22	47226503	TBC1D22A;TBC1D22A;TBC1D22A;TBC1D22A;TBC1D22A	Body;Body;Body;Body;Body	FALSE	Yes
cg16182860	2.94e-05	+++++	0.00699164	1	95391359	CNN3;CNN3;CNN3;CNN3	1stExon;Body;Body;5'UTR	FALSE	Yes
cg03728778	2.95e-05	+++++	0.00701307	3	113271825	SIDT1;SIDT1	Body;Body	FALSE	Yes
cg18817664	2.97e-05	-----	0.00704647	19	2987337	TLE6;TLE6;TLE6;TLE6	Body;ExonBnd;ExonBnd;Body	FALSE	Yes
cg10028097	2.97e-05	-----	0.00704647	5	125296986			FALSE	Yes
cg14584292	2.97e-05	-----	0.00704647	11	122063558	MIR100HG	Body	FALSE	Yes
cg15999700	2.97e-05	+++++	0.00704647	8	1721148	CLN8	Body	FALSE	Yes
cg09216437	2.98e-05	-----	0.00706312	12	93813562	UBE2N	Body	FALSE	Yes
cg11477415	2.98e-05	+++++	0.00706312	17	60702770			FALSE	Yes
cg14853432	2.99e-05	-----	0.00708209	16	17436920	XYLT1	Body	FALSE	Yes
cg00621302	2.99e-05	-----	0.00708209	5	150159900	SMIM3	5'UTR	FALSE	Yes
cg12769615	3e-05	-----	0.00709631	4	95653156			FALSE	Yes
cg16201313	3e-05	-----	0.00709631	12	46568514			FALSE	Yes
cg24033948	3e-05	-----	0.00709631	10	63595495			FALSE	Yes
cg17915436	3.03e-05	-----	0.00715536	10	8179599			FALSE	Yes
cg04368942	3.03e-05	-----	0.00715536	7	134571320	CALD1;CALD1;CALD1	Body;Body;Body	FALSE	Yes
cg14748210	3.03e-05	-----	0.00715536	1	2146344			FALSE	Yes
cg00424367	3.04e-05	-----	0.00717183	3	193678465	LOC647323	Body	FALSE	Yes
cg14193908	3.04e-05	-----	0.00717183	7	114562037	MDFIC;MDFIC;MDFIC	TSS200;TSS200;TSS200	FALSE	Yes
cg15066323	3.04e-05	+++++	0.00717183	6	39398866	KIF6;KIF6;KIF6;KIF6	1stExon;Body;Body;Body	FALSE	Yes
cg14297797	3.05e-05	-----	0.00718587	17	43867801	CRHR1;CRHR1;MGC57346-CRHR1;MGC57346-CRHR1;CRHR1;CRHR1;CRHR1;CRHR1	5'UTR;5'UTR;5'UTR;5'UTR;Body;Body;Body;Body	FALSE	Yes
cg11929752	3.06e-05	+++++	0.00719988	8	27251134	PTK2B;PTK2B;PTK2B;PTK2B	5'UTR;5'UTR;5'UTR;5'UTR	FALSE	Yes
cg14311465	3.07e-05	-----	0.00721863	9	127530314	NR6A1;NR6A1;NR6A1	Body;Body;Body	FALSE	Yes
cg10229107	3.07e-05	-----	0.00721863	9	14153420	NFIB;NFIB;NFIB;NFIB	Body;Body;Body;5'UTR	FALSE	Yes
cg18838958	3.08e-05	-----	0.00723495	3	67048112	KBTBD8	TSS1500	FALSE	Yes
cg11443905	3.09e-05	-----	0.00725125	4	38181943			FALSE	Yes
cg11815205	3.09e-05	+++++	0.00725125	14	93043858	RIN3	Body	FALSE	Yes
cg02673352	3.1e-05	-----	0.00727232	2	188128734			FALSE	Yes
cg26702908	3.11e-05	+++-+	0.00729096	3	153942432	ARHGEF26;ARHGEF26;ARHGEF26	Body;Body;Body	FALSE	Yes
cg08666741	3.12e-05	-----	0.00730958	9	116861440	KIF12	TSS200	FALSE	Yes
cg26415655	3.12e-05	++++?	0.00730958	5	55148974	IL31RA;IL31RA;IL31RA;IL31RA;IL31RA;IL31RA;IL31RA	TSS200;TSS200;5'UTR;5'UTR;Body;Body;Body	FALSE	Yes
cg22414239	3.13e-05	-----	0.00732093	1	10966685			FALSE	Yes
cg23815765	3.13e-05	-----	0.00732093	5	58422541	PDE4D;PDE4D;PDE4D;PDE4D;PDE4D;PDE4D	Body;Body;Body;Body;Body;Body	FALSE	Yes
cg13877226	3.13e-05	-----	0.00732093	3	149191599	TM4SF4	TSS1500	FALSE	Yes
cg06393885	3.13e-05	+++++	0.00732093	5	153764950	GALNT10	Body	FALSE	Yes
cg16935031	3.14e-05	+++++	0.00734191	15	98539090			FALSE	Yes
cg03154412	3.16e-05	-----	0.00737895	1	9351985	SPSB1	TSS1500	FALSE	Yes
cg26500279	3.16e-05	-----	0.00737895	2	172102394			FALSE	Yes
cg07510387	3.18e-05	+++-+	0.00741347	3	59033261	C3orf67	5'UTR	FALSE	Yes
cg15267533	3.22e-05	-----	0.00749197	8	125667750	MTSS1;MTSS1;MTSS1	Body;Body;Body	FALSE	Yes
cg20000996	3.22e-05	+++?+	0.00749197	17	38498480	RARA-AS1;RARA;RARA;RARA;RARA;RARA	Body;5'UTR;1stExon;Body;Body;Body	FALSE	Yes
cg22396171	3.23e-05	-----	0.00750295	2	169637671	CERS6-AS1;CERS6-AS1	Body;Body	FALSE	Yes
cg07438822	3.25e-05	-----	0.00754201	2	74671795			FALSE	Yes
cg05284740	3.26e-05	-----	0.00755534	11	34125841	NAT10;NAT10	TSS1500;TSS1500	FALSE	Yes
cg00363337	3.26e-05	+++++	0.00755534	3	111329355	CD96;CD96	Body;Body	FALSE	Yes
cg15512958	3.27e-05	-----	0.00757357	14	91711930	GPR68;GPR68	TSS1500;5'UTR	FALSE	Yes
cg07737038	3.29e-05	-----	0.00760749	1	156094663	LMNA;LMNA;LMNA;LMNA;LMNA;LMNA;LMNA	TSS1500;TSS1500;Body;Body;Body;Body;Body	FALSE	Yes
cg24737914	3.29e-05	-----	0.00760749	7	5739289	RNF216;RNF216	Body;Body	FALSE	Yes
cg14943847	3.29e-05	++-++	0.00760749	21	35898827	RCAN1;RCAN1;RCAN1;RCAN1;RCAN1;RCAN1	TSS1500;TSS1500;Body;Body;Body;5'UTR	FALSE	Yes
cg17366452	3.29e-05	+++++	0.00760749	6	150040520	LATS1;LATS1	TSS1500;TSS1500	FALSE	Yes
cg00446839	3.3e-05	-----	0.00762069	20	52367627			FALSE	Yes
cg11174740	3.3e-05	-----	0.00762069	1	19720023	CAPZB;CAPZB;CAPZB;CAPZB	Body;Body;Body;Body	FALSE	Yes
cg08003943	3.3e-05	+++++	0.00762069	16	12096413	SNX29	Body	FALSE	Yes
cg21682295	3.32e-05	-----	0.00765444	11	13337732	ARNTL;ARNTL;ARNTL;ARNTL;ARNTL;ARNTL	5'UTR;5'UTR;5'UTR;5'UTR;5'UTR;5'UTR	FALSE	Yes
cg00148035	3.32e-05	-----	0.00765444	12	111543137	CUX2	Body	FALSE	Yes
cg15785534	3.32e-05	+++++	0.00765444	10	126504129	FAM175B	Body	FALSE	Yes
cg10530239	3.35e-05	-----	0.0077061	2	159602048			FALSE	Yes
cg26589003	3.35e-05	-----	0.0077061	1	39680738	MACF1	Body	FALSE	Yes
cg21709126	3.35e-05	-----	0.0077061	2	106484774	NCK2;NCK2;NCK2	Body;Body;Body	FALSE	Yes
cg01500760	3.35e-05	-----	0.0077061	10	14630459	FAM107B;FAM107B;FAM107B;FAM107B	5'UTR;5'UTR;Body;5'UTR	FALSE	Yes
cg07879334	3.36e-05	-----	0.0077216	15	74726700	SEMA7A;SEMA7A;SEMA7A	TSS1500;TSS1500;TSS1500	FALSE	Yes
cg00902185	3.36e-05	+++++	0.0077216	22	20232832	RTN4R	Body	FALSE	Yes
cg15384365	3.39e-05	+++++	0.00778299	1	204071182	SOX13	5'UTR	FALSE	Yes
cg15930276	3.4e-05	-----	0.00779084	3	183878463	DVL3	Body	FALSE	Yes
cg22950986	3.4e-05	-----	0.00779084	3	133163177	BFSP2	Body	FALSE	Yes
cg22454558	3.43e-05	-----	0.00785198	22	28123229			FALSE	Yes
cg04553688	3.43e-05	+++-+	0.00785198	11	14291844			FALSE	Yes
cg22528339	3.44e-05	-----	0.0078698	13	49011342	LPAR6;RB1	5'UTR;Body	FALSE	Yes
cg25860598	3.47e-05	---+-	0.00792822	4	146099474	OTUD4	5'UTR	FALSE	Yes
cg02223914	3.47e-05	-----	0.00792822	3	50463660	CACNA2D2;CACNA2D2;CACNA2D2;CACNA2D2	Body;Body;Body;Body	FALSE	Yes
cg22407789	3.5e-05	+++++	0.00798392	5	18746288			FALSE	Yes
cg15961658	3.51e-05	+++++	0.00800159	10	11334294	CELF2;CELF2;CELF2;CELF2	Body;Body;Body;Body	FALSE	Yes
cg10955522	3.51e-05	+++++	0.00800159	7	5274975			FALSE	Yes
cg20293888	3.53e-05	-----	0.00803945	7	2861750	GNA12;GNA12	Body;Body	FALSE	Yes
cg21545147	3.54e-05	+++++	0.00805448	6	37507123			FALSE	Yes
cg07766402	3.55e-05	-----	0.00807206	17	2143584	SMG6;SMG6	5'UTR;Body	FALSE	Yes
cg19819266	3.56e-05	+++++	0.00808703	15	50525180	SLC27A2;SLC27A2	Body;Body	FALSE	Yes
cg26301974	3.56e-05	+++++	0.00808703	11	71929392	FOLR2;FOLR2;FOLR2;FOLR2	5'UTR;5'UTR;5'UTR;5'UTR	FALSE	Yes
cg07172149	3.57e-05	-?---	0.00810456	7	136567872	CHRM2;CHRM2;CHRM2;CHRM2;CHRM2;CHRM2;CHRM2;CHRM2	5'UTR;5'UTR;5'UTR;5'UTR;5'UTR;5'UTR;5'UTR;5'UTR	FALSE	Yes
cg12755501	3.57e-05	+++++	0.00810456	2	43144759			FALSE	Yes
cg09967994	3.58e-05	-----	0.00812207	21	15824713			FALSE	Yes
cg23320029	3.59e-05	-----	0.00814216	3	171004750	TNIK;TNIK;TNIK;TNIK;TNIK;TNIK;TNIK;TNIK	Body;Body;Body;Body;Body;Body;Body;Body	FALSE	Yes
cg26451824	3.6e-05	-----	0.00815703	3	134094802	AMOTL2;AMOTL2;AMOTL2	TSS1500;TSS1500;TSS1500	FALSE	Yes
cg09812137	3.6e-05	+++-+	0.00815703	15	42869920	STARD9	Body	FALSE	Yes
cg26514511	3.6e-05	+++++	0.00815703	7	106720015	PRKAR2B	Body	FALSE	Yes
cg10989144	3.61e-05	-----	0.00817186	3	187501131			FALSE	Yes
cg19078081	3.61e-05	+++++	0.00817186	5	163616087			FALSE	Yes
cg26763488	3.63e-05	-----	0.00821452	10	105507847	SH3PXD2A;SH3PXD2A-AS1	Body;Body	FALSE	Yes
cg15352013	3.66e-05	+++++	0.00826661	16	49497733			FALSE	Yes
cg17746899	3.67e-05	+++++	0.00828656	11	82503066			FALSE	Yes
cg13426198	3.69e-05	-----	0.00832114	16	5030223	SEC14L5	Body	FALSE	Yes
cg27495424	3.69e-05	-----	0.00832114	2	88925098	EIF2AK3	Body	FALSE	Yes
cg00470855	3.71e-05	-----	0.00835563	3	45455968	LARS2	Body	FALSE	Yes
cg20110364	3.72e-05	-----	0.00837284	15	74726906	SEMA7A;SEMA7A;SEMA7A	TSS1500;TSS1500;TSS1500	FALSE	Yes
cg04987012	3.73e-05	-----	0.00838738	16	85913624			FALSE	Yes
cg03742937	3.73e-05	-----	0.00838738	11	68104919	LRP5;LRP5	5'UTR;Body	FALSE	Yes
cg16734637	3.76e-05	-----	0.00844147	3	71100200	FOXP1;FOXP1;FOXP1;FOXP1;FOXP1;FOXP1;FOXP1;FOXP1	Body;Body;Body;Body;Body;Body;Body;Body	FALSE	Yes
cg17594757	3.76e-05	-----	0.00844147	1	16769001	NECAP2;NECAP2;NECAP2	Body;Body;Body	FALSE	Yes
cg07388313	3.76e-05	-----	0.00844147	18	72654549	ZNF407	Body	FALSE	Yes
cg19091893	3.77e-05	-----	0.00845591	2	223906444			FALSE	Yes
cg17929450	3.78e-05	-----	0.00847566	15	57630551			FALSE	Yes
cg27553048	3.79e-05	+++++	0.00848737	1	111772613	CHI3L2;CHI3L2;CHI3L2	5'UTR;Body;Body	FALSE	Yes
cg10696060	3.79e-05	++-++	0.00848737	16	57673193	ADGRG1;ADGRG1;ADGRG1;ADGRG1;ADGRG1;ADGRG1;ADGRG1;ADGRG1;ADGRG1;ADGRG1;ADGRG1	TSS200;TSS200;5'UTR;5'UTR;5'UTR;5'UTR;5'UTR;5'UTR;5'UTR;5'UTR;5'UTR	FALSE	Yes
cg11614941	3.8e-05	+++++	0.00850172	20	4906994	SLC23A2;SLC23A2	Body;Body	FALSE	Yes
cg03773235	3.81e-05	-----	0.00851337	12	56241110			FALSE	Yes
cg16410715	3.81e-05	+++++	0.00851337	6	139090474	LOC100507462	Body	FALSE	Yes
cg22139665	3.81e-05	+++++	0.00851337	10	103733410	C10orf76	Body	FALSE	Yes
cg14224139	3.83e-05	-----	0.00854999	7	99755416	C7orf43;MIR4658;C7orf43	Body;TSS1500;5'UTR	FALSE	Yes
cg14411154	3.83e-05	-----	0.00854999	14	74237682	ELMSAN1	5'UTR	FALSE	Yes
cg22907232	3.84e-05	-----	0.00856962	3	12486268			FALSE	Yes
cg07115139	3.85e-05	-----	0.00858654	20	33900399	UQCC1;UQCC1;UQCC1	Body;Body;Body	FALSE	Yes
cg23469537	3.85e-05	+++++	0.00858654	6	141130982			FALSE	Yes
cg10410419	3.86e-05	+----	0.00860074	11	64622681	EHD1	Body;Body;Body	FALSE	Yes
cg13164743	3.86e-05	+++++	0.00860074	1	27950612	FGR;FGR;FGR	5'UTR;5'UTR;5'UTR	FALSE	Yes
cg19244790	3.87e-05	-----	0.00861492	2	192111082	MYO1B;MYO1B;MYO1B	5'UTR;5'UTR;5'UTR	FALSE	Yes
cg01845656	3.87e-05	--+--	0.00861492	13	96130731	CLDN10;CLDN10	Body;Body	FALSE	Yes
cg05653335	3.88e-05	-----	0.00863177	17	76169603			FALSE	Yes
cg04012574	3.89e-05	+++++	0.0086513	10	4086125			FALSE	Yes
cg05078438	3.9e-05	+++++	0.0086627	16	83813639	CDH13;CDH13;CDH13;CDH13	Body;Body;Body;Body	FALSE	Yes
cg11581653	3.91e-05	+++++	0.00867677	5	176085973	TSPAN17;TSPAN17;TSPAN17	3'UTR;3'UTR;3'UTR	FALSE	Yes
cg08510549	3.91e-05	+++++	0.00867677	17	55682402	LOC101927539;MSI2;MSI2	Body;Body;Body	FALSE	Yes
cg04033847	3.93e-05	-----	0.00870755	16	85974047			FALSE	Yes
cg00361201	3.93e-05	++-++	0.00870755	1	45974726	MMACHC	Body	FALSE	Yes
cg14533030	3.94e-05	+++++	0.00872698	5	119771163			FALSE	Yes
cg25161899	3.97e-05	-----	0.00878248	11	85028237	DLG2	Body	FALSE	Yes
cg04113977	3.97e-05	-----	0.00878248	2	106724020	UXS1;UXS1;UXS1;UXS1	Body;Body;Body;Body	FALSE	Yes
cg26625593	3.99e-05	++-++	0.00882123	10	98460747	PIK3AP1	Body	FALSE	Yes
cg10147226	4e-05	+++++	0.00883784	13	40360170	COG6	Body	FALSE	Yes
cg18906919	4.02e-05	-----	0.00887099	16	30534431	ITGAL;ITGAL	3'UTR;3'UTR	FALSE	Yes
cg17879374	4.04e-05	-----	0.00890682	2	233246568	ALPP	3'UTR	FALSE	Yes
cg18669861	4.05e-05	-----	0.0089261	3	16555789	RFTN1	TSS1500	FALSE	Yes
cg14326315	4.06e-05	-----	0.00894536	3	151986151	MBNL1-AS1;MBNL1-AS1;MBNL1;MBNL1;MBNL1;MBNL1	Body;Body;1stExon;1stExon;5'UTR;5'UTR	FALSE	Yes
cg19129200	4.07e-05	-----	0.00895628	10	101355830			FALSE	Yes
cg04312120	4.07e-05	-----	0.00895628	5	174944864	SFXN1	Body	FALSE	Yes
cg11917035	4.08e-05	+++++	0.00896718	X	2700024	XG;XG;XG	Body;Body;Body	FALSE	Yes
cg02785458	4.1e-05	-----	0.00899999	2	111147850			FALSE	Yes
cg12051715	4.1e-05	+++++	0.00899999	8	28486579			FALSE	Yes
cg16960356	4.12e-05	-----	0.00903831	1	68177614	GNG12	5'UTR	FALSE	Yes
cg26038743	4.13e-05	-----	0.00905466	13	51871659			FALSE	Yes
cg15768040	4.14e-05	+++++	0.00907378	9	98222052	PTCH1;PTCH1;PTCH1;PTCH1;PTCH1;PTCH1;PTCH1;PTCH1;PTCH1;PTCH1;PTCH1;PTCH1;PTCH1;PTCH1	Body;Body;Body;Body;Body;Body;Body;ExonBnd;ExonBnd;ExonBnd;ExonBnd;ExonBnd;ExonBnd;ExonBnd	FALSE	Yes
cg05472536	4.15e-05	-----	0.00908169	17	73687477	SAP30BP;SAP30BP;SAP30BP;SAP30BP;SAP30BP	Body;Body;Body;Body;Body	FALSE	Yes
cg22536332	4.15e-05	+++++	0.00908169	1	159761162			FALSE	Yes
cg03399879	4.15e-05	+++++	0.00908169	3	16509813	RFTN1	Body	FALSE	Yes
cg15205409	4.16e-05	-----	0.00908957	1	193279822	LINC01031	Body	FALSE	Yes
cg17874010	4.16e-05	+++++	0.00908957	4	151056662	DCLK2;DCLK2;DCLK2	Body;Body;Body	FALSE	Yes
cg21638700	4.17e-05	+++++	0.00910022	2	192710226	SDPR	Body	FALSE	Yes
cg07136393	4.17e-05	+++++	0.00910022	13	109776430	MYO16;MYO16	Body;Body	FALSE	Yes
cg19984613	4.17e-05	+++++	0.00910022	9	89382014			FALSE	Yes
cg01803294	4.19e-05	++-++	0.00914106	5	54239929			FALSE	Yes
cg26946442	4.2e-05	+++++	0.00915725	16	88078047	BANP;BANP;BANP;BANP;BANP;BANP;BANP	Body;Body;Body;Body;Body;Body;Body	FALSE	Yes
cg25361968	4.21e-05	++++-	0.00917624	10	98430309	PIK3AP1	Body	FALSE	Yes
cg19259203	4.22e-05	++-++	0.00919239	7	32290576	PDE1C	Body	FALSE	Yes
cg02956479	4.26e-05	+++++	0.00927384	11	48065711	PTPRJ;PTPRJ	Body;Body	FALSE	Yes
cg14153481	4.27e-05	-----	0.00928707	16	75271492	BCAR1;BCAR1;BCAR1;BCAR1;BCAR1;BCAR1;BCAR1;BCAR1;BCAR1	Body;Body;Body;Body;Body;Body;Body;Body;Body	FALSE	Yes
cg11769885	4.29e-05	+++++	0.00931915	1	42384491	HIVEP3;HIVEP3;HIVEP3;HIVEP3	TSS200;TSS200;Body;Body	FALSE	Yes
cg04515132	4.34e-05	+++++	0.00940476	3	53787670	CACNA1D;CACNA1D;CACNA1D	Body;Body;Body	FALSE	Yes
cg09526452	4.36e-05	-----	0.00944234	3	14990466	FGD5-AS1;FGD5-AS1;FGD5-AS1;FGD5-AS1;NR2C2;NR2C2;FGD5-AS1	TSS1500;TSS1500;TSS1500;TSS1500;5'UTR;5'UTR;TSS1500	FALSE	Yes
cg25330143	4.37e-05	-----	0.00945823	2	220299134	SPEG	TSS1500	FALSE	Yes
cg11526227	4.37e-05	-----	0.00945823	22	25346754			FALSE	Yes
cg25016926	4.38e-05	+++++	0.00947121	13	52748054	MRPS31P5;MRPS31P5;MRPS31P5;MRPS31P5	Body;Body;Body;Body	FALSE	Yes
cg10716444	4.38e-05	+++++	0.00947121	3	141405880			FALSE	Yes
cg03067296	4.39e-05	-----	0.00948995	17	76274577	LOC100996291	TSS200	FALSE	Yes
cg04100201	4.4e-05	-----	0.0095	11	32459819	WT1-AS;WT1-AS;WT1-AS;WT1-AS	Body;Body;Body;Body	FALSE	Yes
cg17282301	4.4e-05	+++++	0.0095	17	38498582	RARA-AS1;RARA;RARA;RARA;RARA;RARA	Body;5'UTR;1stExon;Body;Body;Body	FALSE	Yes
cg17184458	4.41e-05	-----	0.00951003	17	41733935	MEOX1;MEOX1;MEOX1	Body;Body;Body	FALSE	Yes
cg11284299	4.41e-05	+++++	0.00951003	10	115784904			FALSE	Yes
cg08629099	4.41e-05	+++++	0.00951003	1	244418111			FALSE	Yes
cg22010547	4.44e-05	-----	0.00956601	1	24235907	CNR2	5'UTR	FALSE	Yes
cg06353065	4.44e-05	-----	0.00956601	15	31778988	OTUD7A	Body	FALSE	Yes
cg12423877	4.44e-05	+++++	0.00956601	8	70680724	SLCO5A1;SLCO5A1;SLCO5A1	Body;Body;Body	FALSE	Yes
cg12842322	4.45e-05	-----	0.00958174	11	34305866	ABTB2	Body	FALSE	Yes
cg16102363	4.46e-05	-----	0.00960037	10	104376001	SUFU;SUFU	Body;Body	FALSE	Yes
cg10404078	4.48e-05	-----	0.0096201	18	3209947	MYOM1;MYOM1	Body;Body	FALSE	Yes
cg25006435	4.48e-05	-----	0.0096201	1	154898438	PMVK	Body	FALSE	Yes
cg27635372	4.49e-05	-----	0.00963574	4	2795705	SH3BP2	5'UTR	FALSE	Yes
cg26049648	4.5e-05	-----	0.00965429	17	41607973	ETV4;ETV4;ETV4;ETV4;ETV4	TSS200;Body;Body;Body;Body	FALSE	Yes
cg09176441	4.51e-05	-----	0.00966407	2	109253700	LIMS1;LIMS1;LIMS1;LIMS1;LIMS1	5'UTR;5'UTR;Body;Body;Body	FALSE	Yes
cg15472659	4.52e-05	-----	0.00967965	17	75663362			FALSE	Yes
cg07677174	4.52e-05	-----	0.00967965	6	106001159			FALSE	Yes
cg27014672	4.55e-05	-----	0.00972631	10	102756640	LZTS2	TSS1500	FALSE	Yes
cg12533029	4.55e-05	-----	0.00972631	13	96209102	CLDN10;CLDN10;CLDN10	Body;Body;Body	FALSE	Yes
cg13360848	4.55e-05	-----	0.00972631	5	106822319	EFNA5	Body	FALSE	Yes
cg05237200	4.56e-05	-----	0.00974182	7	27175796			FALSE	Yes
cg17307991	4.57e-05	+++++	0.00976025	7	64350510			FALSE	Yes
cg00698355	4.59e-05	+++++	0.00979413	2	60165556			FALSE	Yes
cg24507742	4.61e-05	-----	0.00983385	19	47288244	SLC1A5;SLC1A5;SLC1A5	5'UTR;TSS200;Body	FALSE	Yes
cg07340660	4.62e-05	-----	0.00984336	14	31043993	G2E3;G2E3	5'UTR;5'UTR	FALSE	Yes
cg02346636	4.62e-05	-----	0.00984336	7	66192282	RABGEF1	5'UTR	FALSE	Yes
cg15980749	4.63e-05	+++++	0.00986171	12	25736589	LMNTD1	Body	FALSE	Yes
cg26744408	4.64e-05	+++++	0.00987708	6	25535763	LRRC16A;LRRC16A	Body;Body	FALSE	Yes
cg22508597	4.65e-05	-----	0.00988948	2	86595430			FALSE	Yes
cg14287089	4.66e-05	+++++	0.00990481	17	72983046	CDR2L	TSS1500	FALSE	Yes
cg21566642	1.63e-121	-----	1.15786e-115	2	233284661			TRUE	No
cg01940273	1.09e-109	-----	3.87136e-104	2	233284934			TRUE	No
cg05575921	2.9e-99	-----	6.86663e-94	5	373378	AHRR	Body	TRUE	No
cg17087741	1.1e-70	-----	1.30229e-65	2	233283010			TRUE	No
cg26703534	7.91e-59	-----	5.108e-54	5	377358	AHRR	Body	TRUE	No
cg05284742	7.81e-56	-----	4.62314e-51	14	93552128	ITPK1	Body;Body;Body	TRUE	No
cg11660018	1.81e-54	-----	9.89013e-50	11	86510915	PRSS23	TSS1500	TRUE	No
cg24859433	1.44e-51	-----	7.30636e-47	6	30720203			TRUE	No
cg09935388	9.24e-51	-----	4.3757e-46	1	92947588	GFI1	Body;Body;Body	TRUE	No
cg25648203	1.02e-50	-----	4.52842e-46	5	395444	AHRR	Body	TRUE	No
cg23079012	5.2e-49	-----	2.17281e-44	2	8343710			TRUE	No
cg25189904	3.81e-47	-----	1.50356e-42	1	68299493	GNG12	TSS1500	TRUE	No
cg14753356	9.64e-45	-----	3.42384e-40	6	30720108			TRUE	No
cg04551776	2.36e-44	-----	7.98288e-40	5	393366	AHRR	Body	TRUE	No
cg23161492	2.17e-40	-----	7.00655e-36	15	90357202	ANPEP	5'UTR	TRUE	No
cg21611682	9.4e-40	-----	2.90313e-35	11	68138269	LRP5	Body	TRUE	No
cg13193840	1.89e-39	-----	5.59394e-35	2	233285289			TRUE	No
cg12803068	1.09e-34	+++++	2.34628e-30	7	45002919	MYO1G	Body	TRUE	No
cg27241845	2.85e-34	-----	5.78421e-30	2	233250370			TRUE	No
cg00073090	4.79e-33	-----	8.95404e-29	19	1265879			TRUE	No
cg15159987	5.89e-32	-----	1.0728e-27	19	17003890	CPAMD8	3'UTR	TRUE	No
cg07339236	6.76e-32	-----	1.20048e-27	20	50312490	ATP9A	Body	TRUE	No
cg21322436	9.41e-31	---?-	1.55449e-26	7	145812842	CNTNAP2	TSS1500	TRUE	No
cg17287155	2.73e-30	---?-	4.40734e-26	5	393347	AHRR	Body	TRUE	No
cg04885881	7.41e-30	-----	1.14427e-25	1	11123118			TRUE	No
cg11902777	2.89e-29	-----	4.18956e-25	5	368843	AHRR	Body	TRUE	No
cg00501876	6.54e-29	-----	9.29126e-25	3	39193251	CSRNP1	5'UTR	TRUE	No
cg01692968	2.14e-28	-----	2.98065e-24	9	108005349			TRUE	No
cg07986378	1.19e-27	-----	1.62559e-23	12	11898284	ETV6	Body	TRUE	No
cg07251887	1.42e-27	-----	1.86793e-23	17	73641809	LOC100130933;RECQL5	TSS1500;Body	TRUE	No
cg14580211	6.59e-27	-----	8.35919e-23	5	150161299	C5orf62	Body	TRUE	No
cg27537125	1.3e-26	-----	1.62008e-22	1	25349681			TRUE	No
cg26963277	1.27e-25	-----	1.47891e-21	11	2722407	KCNQ1OT1;KCNQ1;KCNQ1	TSS1500;Body;Body	TRUE	No
cg18316974	1.94e-25	-----	2.1874e-21	1	92947035	GFI1;GFI1;GFI1	Body;Body;Body	TRUE	No
cg12876356	2.28e-25	-----	2.53059e-21	1	92946825	GFI1;GFI1;GFI1	Body;Body;Body	TRUE	No
cg11207515	6.23e-25	+++++	6.60511e-21	7	146904205	CNTNAP2	Body	TRUE	No
cg04535902	7.72e-25	-----	8.06446e-21	1	92947332	GFI1;GFI1;GFI1	Body;Body;Body	TRUE	No
cg10750182	1.11e-24	-----	1.14272e-20	10	73497514	C10orf105;C10orf105;CDH23	5'UTR;1stExon;Body	TRUE	No
cg26361535	1.27e-24	-----	1.28876e-20	8	144576604	ZC3H3	Body	TRUE	No
cg08709672	1.47e-24	-----	1.47071e-20	1	206224334	AVPR1B;AVPR1B	5'UTR;1stExon	TRUE	No
cg12806681	4.81e-24	-----	4.74547e-20	5	368394	AHRR	Body	TRUE	No
cg11554391	2.28e-23	-----	2.2186e-19	5	321320	AHRR	Body	TRUE	No
cg00310412	3.06e-23	-----	2.89819e-19	15	74724918	SEMA7A;SEMA7A;SEMA7A	Body;Body;5'UTR	TRUE	No
cg24090911	6.76e-23	-----	6.23624e-19	5	400732	AHRR	Body	TRUE	No
cg25212025	1.03e-22	-----	9.14564e-19	10	34602937	PARD3	Body	TRUE	No
cg05221370	1.04e-21	-----	8.7947e-18	7	110738836	LRRN3;IMMP2L;LRRN3;LRRN3	5'UTR;Body;5'UTR;5'UTR	TRUE	No
cg02583484	1.06e-21	-----	8.85837e-18	12	54677008	HNRNPA1;HNRPA1L-2;HNRNPA1	Body;Body;Body	TRUE	No
cg18146737	3.09e-21	---?-	2.52294e-17	1	92946700	GFI1;GFI1;GFI1	Body;Body;Body	TRUE	No
cg14624207	3.5e-21	-----	2.82522e-17	11	68142198	LRP5	Body	TRUE	No
cg23916896	6e-21	-----	4.73561e-17	5	368804	AHRR	Body	TRUE	No
cg01901332	3.58e-20	-----	2.67686e-16	11	75031054	ARRB1;ARRB1	Body;Body	TRUE	No
cg26764244	3.74e-20	-----	2.73884e-16	1	68299511	GNG12	TSS1500	TRUE	No
cg24049493	4.41e-20	+++++	3.19653e-16	1	42385941	HIVEP3;HIVEP3	TSS1500;TSS1500	TRUE	No
cg02451831	5.24e-20	-----	3.75978e-16	7	26578098	KIAA0087	Body	TRUE	No
cg14120703	7.64e-20	-----	5.39437e-16	9	139416102	NOTCH1	Body	TRUE	No
cg20059012	7.67e-20	----?	5.39437e-16	12	53613154	RARG;RARG	Body;Body	TRUE	No
cg21140898	8.57e-20	-----	5.96826e-16	1	51442318			TRUE	No
cg16145216	1.05e-19	+++++	7.24134e-16	1	42385662	HIVEP3;HIVEP3	TSS1500;TSS1500	TRUE	No
cg23090529	1.92e-19	-----	1.29891e-15	1	51442133			TRUE	No
cg13525276	2.66e-19	+++++	1.73349e-15	14	81426012	TSHR;TSHR;TSHR	Body;Body;Body	TRUE	No
cg04180046	2.83e-19	+++++	1.82751e-15	7	45002736	MYO1G	Body	TRUE	No
cg17619755	4.69e-19	+++++	3.00135e-15	6	31760629	VARS	Body	TRUE	No
cg01127300	4.94e-19	-----	3.10538e-15	22	38614796			TRUE	No
cg09662411	9.02e-19	-----	5.52351e-15	1	92946132	GFI1;GFI1;GFI1	Body;Body;Body	TRUE	No
cg10788371	1.36e-18	-----	8.18698e-15	11	76381040	LRRC32;LRRC32;LRRC32	5'UTR;1stExon;5'UTR	TRUE	No
cg06635952	1.41e-18	+++++	8.41665e-15	2	70025869	ANXA4	Body	TRUE	No
cg21121843	2.09e-18	-----	1.23718e-14	4	3203982	HTT	Body	TRUE	No
cg15542713	4.2e-18	+++++	2.42555e-14	1	42385581	HIVEP3;HIVEP3	TSS1500;TSS1500	TRUE	No
cg20146909	1.34e-17	-----	7.49494e-14	1	90289611	LRRC8D;LRRC8D	5'UTR;5'UTR	TRUE	No
cg16611234	1.93e-17	-----	1.07106e-13	11	58870075			TRUE	No
cg01731783	2.41e-17	-----	1.31223e-13	14	74211788	C14orf43;C14orf43	5'UTR;5'UTR	TRUE	No
cg21393163	2.42e-17	-----	1.31223e-13	1	12217629			TRUE	No
cg26271591	3.79e-17	-----	2.03954e-13	2	178125956	NFE2L2;NFE2L2;NFE2L2	Body;5'UTR;5'UTR	TRUE	No
cg08035323	4.7e-17	+++++	2.49149e-13	2	9843525			TRUE	No
cg00871610	5.01e-17	-----	2.63615e-13	21	37093012	MIR802	Body	TRUE	No
cg03707168	7.54e-17	-----	3.90947e-13	19	49379127	PPP1R15A	Body	TRUE	No
cg13039251	8.16e-17	+++++	4.17006e-13	5	32018601	PDZD2	Body	TRUE	No
cg10807309	8.52e-17	+++++	4.32293e-13	6	31761062	VARS	Body	TRUE	No
cg09837977	2.01e-16	-----	9.91518e-13	7	110731201	LRRN3;LRRN3;IMMP2L;LRRN3;LRRN3;LRRN3;LRRN3	5'UTR;1stExon;Body;5'UTR;1stExon;1stExon;5'UTR	TRUE	No
cg24838345	3.27e-16	-----	1.57427e-12	8	125737353	MTSS1	Body	TRUE	No
cg07178945	3.71e-16	+++++	1.76165e-12	12	4488800	FGF23;FGF23	5'UTR;1stExon	TRUE	No
cg06235438	4.72e-16	-----	2.19138e-12	16	30485966	ITGAL;ITGAL	Body;Body	TRUE	No
cg17907003	5.82e-16	-----	2.66722e-12	1	117533414			TRUE	No
cg02743070	7.46e-16	-----	3.39689e-12	10	80834309	ZMIZ1	5'UTR	TRUE	No
cg16071219	1.29e-15	-----	5.69155e-12	13	48986124	LPAR6;LPAR6;RB1;LPAR6	Body;Body;Body;1stExon	TRUE	No
cg05875421	1.35e-15	-----	5.91951e-12	14	91709951	GPR68	5'UTR	TRUE	No
cg13937905	1.92e-15	-----	8.36721e-12	12	53612551	RARG;RARG	Body;Body	TRUE	No
cg04018738	2.31e-15	+++?+	9.88487e-12	6	31760616	VARS	Body	TRUE	No
cg23480021	3.42e-15	+++++	1.44605e-11	3	22412746			TRUE	No
cg00548098	4.22e-15	-----	1.75301e-11	16	11295667			TRUE	No
cg12873476	4.94e-15	-----	2.02837e-11	8	142402728			TRUE	No
cg08149865	5.19e-15	-----	2.10667e-11	8	21914600	EPB49;EPB49;EPB49;EPB49	TSS1500;5'UTR;5'UTR;5'UTR	TRUE	No
cg14712058	5.55e-15	---?-	2.22734e-11	19	16988083	SIN3B	Body	TRUE	No
cg19089201	5.76e-15	+++++	2.29863e-11	7	45002287	MYO1G	3'UTR	TRUE	No
cg16047567	6.09e-15	-----	2.41675e-11	1	12664243	DHRS3	Body	TRUE	No
cg01513913	1.17e-14	-----	4.51684e-11	14	106329158			TRUE	No
cg23973524	1.3e-14	+++++	4.96475e-11	19	18873222	CRTC1;CRTC1	Body;Body	TRUE	No
cg18826637	1.63e-14	-?---	5.99925e-11	2	145116633			TRUE	No
cg11436113	1.9e-14	-----	6.92127e-11	20	19191145			TRUE	No
cg20244340	1.93e-14	-----	6.95918e-11	20	19193989	SLC24A3	Body	TRUE	No
cg01208318	2.04e-14	-----	7.31866e-11	14	106329652			TRUE	No
cg22770911	2.11e-14	-----	7.53176e-11	10	8101307	GATA3;GATA3	Body;Body	TRUE	No
cg13985437	2.17e-14	-----	7.7072e-11	11	76381044	LRRC32;LRRC32	5'UTR;TSS200	TRUE	No
cg17372101	2.84e-14	+++++	9.98697e-11	7	147500722	CNTNAP2	Body	TRUE	No
cg25305703	2.9e-14	-----	1.01477e-10	8	128378218			TRUE	No
cg15693572	3.39e-14	+++++	1.16896e-10	3	22412385			TRUE	No
cg23565821	4.46e-14	-----	1.50863e-10	6	33385056	CUTA;CUTA;CUTA;CUTA;CUTA	Body;Body;Body;Body;Body	TRUE	No
cg14316231	7.16e-14	-----	2.35465e-10	8	41895100	MYST3;MYST3;MYST3	Body;Body;Body	TRUE	No
cg24771152	8e-14	+++++	2.60676e-10	6	31760608	VARS	Body	TRUE	No
cg10179300	8.39e-14	-----	2.72135e-10	5	14147618	TRIO	Body	TRUE	No
cg25953130	9.58e-14	-----	3.06535e-10	10	63753550	ARID5B	Body	TRUE	No
cg05460226	1.17e-13	-----	3.71026e-10	17	8804279	PIK3R5;PIK3R5	Body;Body	TRUE	No
cg07202214	1.2e-13	-----	3.77172e-10	11	76381081	LRRC32;LRRC32	5'UTR;TSS200	TRUE	No
cg10062919	1.2e-13	-----	3.77172e-10	17	38503802	RARA;RARA;RARA;RARA	Body;Body;Body;Body	TRUE	No
cg20059928	1.4e-13	-----	4.38096e-10	15	40361485			TRUE	No
cg15474579	1.53e-13	-----	4.72531e-10	6	36645812	CDKN1A;CDKN1A	TSS1500;TSS1500	TRUE	No
cg13184736	1.83e-13	-----	5.60312e-10	1	68299409	GNG12	TSS1500	TRUE	No
cg10814005	2.06e-13	-----	6.28027e-10	14	91711041	GPR68	5'UTR	TRUE	No
cg04368724	2.07e-13	+++++	6.28379e-10	6	31760593	VARS	Body	TRUE	No
cg13038618	2.16e-13	-----	6.52909e-10	14	77467391			TRUE	No
cg01481251	3.08e-13	-----	9.19265e-10	11	32912719			TRUE	No
cg26242531	3.17e-13	+++++	9.42168e-10	14	104190678	ZFYVE21	Body	TRUE	No
cg14179389	3.96e-13	---?-	1.14348e-09	1	92947961	GFI1;GFI1;GFI1	Body;Body;Body	TRUE	No
cg08899667	4.11e-13	+++++	1.17722e-09	6	31761055	VARS	Body	TRUE	No
cg05302489	4.25e-13	+++++	1.20758e-09	6	31760426	VARS	Body	TRUE	No
cg02532700	4.78e-13	-----	1.33678e-09	22	37257404	NCF4;NCF4	Body;Body	TRUE	No
cg11666770	5.37e-13	-----	1.49005e-09	19	42430910			TRUE	No
cg13633560	7e-13	-----	1.90513e-09	11	76380921	LRRC32;LRRC32;LRRC32	5'UTR;1stExon;5'UTR	TRUE	No
cg12547807	9.18e-13	-----	2.46073e-09	1	9473751			TRUE	No
cg01272202	1.3e-12	-----	3.38258e-09	5	112716899	MCC	Body	TRUE	No
cg24996979	1.34e-12	-----	3.47393e-09	14	74223355	C14orf43;C14orf43	5'UTR;5'UTR	TRUE	No
cg13976502	1.43e-12	-----	3.65391e-09	14	74227875	C14orf43;C14orf43	5'UTR;TSS1500	TRUE	No
cg22891595	1.43e-12	+++++	3.65391e-09	3	193570256			TRUE	No
cg07090714	1.58e-12	-----	4.00835e-09	6	6857062			TRUE	No
cg02610360	1.71e-12	+++++	4.29217e-09	11	120197521	TMEM136	5'UTR	TRUE	No
cg23594345	1.75e-12	-----	4.3771e-09	14	106329607			TRUE	No
cg03547355	1.8e-12	-----	4.48636e-09	1	227003060			TRUE	No
cg09197783	1.87e-12	-----	4.64454e-09	11	57176720	SLC43A3;SLC43A3;SLC43A3	Body;Body;Body	TRUE	No
cg13787850	1.99e-12	-----	4.90826e-09	9	102195951			TRUE	No
cg10691866	2.03e-12	-----	4.98959e-09	7	65817282	TPST1	Body	TRUE	No
cg19614811	2.3e-12	----?	5.57606e-09	3	98250723	GPR15	TSS200	TRUE	No
cg20066188	2.64e-12	-----	6.31414e-09	22	37678791	CYTH4	Body	TRUE	No
cg13074055	2.65e-12	-----	6.31679e-09	14	106329206			TRUE	No
cg20438687	2.72e-12	-----	6.39777e-09	17	4761644	MINK1;MINK1;MINK1;MINK1	Body;Body;Body;Body	TRUE	No
cg13399816	3.05e-12	-----	7.10341e-09	1	68299468	GNG12	TSS1500	TRUE	No
cg10874644	3.16e-12	+++++	7.31165e-09	5	83898708			TRUE	No
cg01097768	4.09e-12	-----	9.25253e-09	5	378854	AHRR	Body	TRUE	No
cg10420527	4.39e-12	-----	9.89967e-09	11	68138505	LRP5	Body	TRUE	No
cg07381806	5.23e-12	---?-	1.17566e-08	19	2094327	MOBKL2A	5'UTR	TRUE	No
cg21473814	6.11e-12	+++++	1.35631e-08	19	18873268	CRTC1;CRTC1	Body;Body	TRUE	No
cg10399789	6.66e-12	-----	1.46467e-08	1	92945668	GFI1;GFI1;GFI1	Body;Body;Body	TRUE	No
cg24556382	7.21e-12	-----	1.56623e-08	4	174173455	GALNT7	Body	TRUE	No
cg19266329	7.3e-12	-----	1.58094e-08	1	145456128			TRUE	No
cg06338710	8.03e-12	-----	1.72327e-08	1	92946187	GFI1;GFI1;GFI1	Body;Body;Body	TRUE	No
cg01207684	8.92e-12	-----	1.90704e-08	16	4103167	ADCY9	Body	TRUE	No
cg07265588	9.58e-12	-----	2.03136e-08	4	6574480			TRUE	No
cg21990700	1.05e-11	-----	2.21982e-08	12	7260776	LOC283314;C1RL	TSS200;Body	TRUE	No
cg11556164	1.08e-11	-----	2.27646e-08	7	110738315	LRRN3;IMMP2L;LRRN3;LRRN3	5'UTR;Body;5'UTR;5'UTR	TRUE	No
cg16556677	1.16e-11	-----	2.42352e-08	11	2722401	KCNQ1OT1;KCNQ1;KCNQ1	TSS1500;Body;Body	TRUE	No
cg16255816	1.21e-11	-----	2.51319e-08	17	39889811	HAP1;HAP1;HAP1	Body;Body;Body	TRUE	No
cg26701785	1.3e-11	+++++	2.67665e-08	6	158448455	SYNJ2	Body	TRUE	No
cg12303084	1.4e-11	-----	2.87421e-08	20	45985741	ZMYND8;ZMYND8;ZMYND8	TSS1500;TSS1500;TSS1500	TRUE	No
cg11735008	1.41e-11	+++++	2.8864e-08	1	42380309	HIVEP3;HIVEP3	5'UTR;5'UTR	TRUE	No
cg07177756	1.43e-11	-----	2.91893e-08	1	173836307	SNORD75;SNORD78;ZBTB37;ZBTB37;SNORD76;GAS5;SNORD77;SNORD44	TSS1500;TSS1500;TSS1500;TSS1500;TSS1500;Body;TSS1500;TSS1500	TRUE	No
cg03340878	1.48e-11	-----	3.00373e-08	6	27925166	OR2B6	1stExon	TRUE	No
cg15068180	1.59e-11	+++++	3.19955e-08	3	194017703			TRUE	No
cg12423733	1.69e-11	+++++	3.37212e-08	6	29454623	MAS1L	1stExon	TRUE	No
cg19719391	1.74e-11	+++++	3.46217e-08	4	26789915			TRUE	No
cg04517079	1.92e-11	-----	3.78849e-08	6	41546161	FOXP4	Body;Body;Body	TRUE	No
cg00295485	2.02e-11	-----	3.96378e-08	2	106755721	UXS1	Body	TRUE	No
cg03604011	2.11e-11	+++?+	4.10635e-08	5	400201	AHRR	Body	TRUE	No
cg16519923	2.12e-11	-----	4.11454e-08	16	30485810	ITGAL	Body;Body	TRUE	No
cg18642234	2.15e-11	-----	4.15009e-08	3	49394622	GPX1	3'UTR;3'UTR;1stExon	TRUE	No
cg27573991	2.43e-11	-----	4.64013e-08	1	247712512	C1orf150	1stExon	TRUE	No
cg08972170	2.49e-11	+++++	4.72928e-08	7	30185776	C7orf41	Body	TRUE	No
cg18446336	2.65e-11	-----	5.01974e-08	7	2847575	GNA12	Body	TRUE	No
cg05603985	3.15e-11	-----	5.8729e-08	1	2161049	SKI	1stExon	TRUE	No
cg14977938	3.24e-11	+++++	6.02488e-08	14	104190829	ZFYVE21	Body	TRUE	No
cg07180646	3.39e-11	-----	6.27098e-08	1	15481541	TMEM51	5'UTR;5'UTR;5'UTR;5'UTR	TRUE	No
cg04224247	3.57e-11	-----	6.56973e-08	X	9984515	WWC3	5'UTR	TRUE	No
cg27460040	3.78e-11	-----	6.88484e-08	8	38648995	TACC1;TACC1;TACC1	Body;Body;5'UTR	TRUE	No
cg05987787	3.8e-11	+++++	6.90357e-08	6	158448508	SYNJ2	Body	TRUE	No
cg20778199	3.91e-11	-----	7.08529e-08	6	148020881			TRUE	No
cg13832201	4.26e-11	-----	7.66089e-08	17	19282521	MAPK7;MAPK7;MAPK7;MAPK7	Body;Body;5'UTR;Body	TRUE	No
cg01598596	4.38e-11	-----	7.8568e-08	3	187464648	BCL6	TSS1500	TRUE	No
cg15187398	5.03e-11	-----	8.95493e-08	19	2093896	MOBKL2A	5'UTR	TRUE	No
cg10919522	5.1e-11	-----	9.03426e-08	14	74227441	C14orf43;C14orf43	5'UTR;TSS1500	TRUE	No
cg24540678	5.34e-11	-----	9.36598e-08	8	28258603			TRUE	No
cg15228441	5.42e-11	-----	9.45958e-08	17	78829930	RPTOR;RPTOR	Body;Body	TRUE	No
cg18033416	5.82e-11	-----	1.0108e-07	17	30592033	RHBDL3	TSS1500	TRUE	No
cg01668352	6.27e-11	-----	1.08103e-07	12	64482597	SRGAP1	Body	TRUE	No
cg10951873	6.75e-11	-----	1.15816e-07	1	25254746	RUNX3;RUNX3	Body;Body	TRUE	No
cg25323554	6.8e-11	-----	1.16284e-07	17	27135257	C17orf63;C17orf63	5'UTR;5'UTR	TRUE	No
cg25730428	7.34e-11	+++++	1.24735e-07	6	29454755	MAS1L	1stExon	TRUE	No
cg01554474	7.39e-11	-----	1.25284e-07	1	155107599	RAG1AP1;RAG1AP1;RAG1AP1	TSS1500;TSS1500;TSS1500	TRUE	No
cg21733098	7.59e-11	-----	1.28064e-07	12	127931219			TRUE	No
cg08289839	7.59e-11	+++++	1.28064e-07	13	111318640	CARS2	Body	TRUE	No
cg26905258	7.84e-11	-----	1.31657e-07	13	77898407	MYCBP2	Body	TRUE	No
cg09338136	8.03e-11	-----	1.34529e-07	5	344057	AHRR	Body	TRUE	No
cg05886626	8.18e-11	-----	1.3672e-07	15	39873553	THBS1	5'UTR	TRUE	No
cg08549335	8.48e-11	-----	1.4107e-07	7	30387954	ZNRF2	Body	TRUE	No
cg04039397	8.84e-11	-----	1.46373e-07	3	111260783	CD96;CD96	TSS200;TSS200	TRUE	No
cg05673882	9.45e-11	-----	1.55748e-07	5	74862702	POLK	Body	TRUE	No
cg22403782	1.02e-10	-----	1.67332e-07	2	233246136	ALPP	Body	TRUE	No
cg02101876	1.04e-10	+++++	1.7022e-07	13	40765110			TRUE	No
cg00711496	1.05e-10	-----	1.71462e-07	19	50191497	C19orf76;PRMT1;PRMT1;PRMT1	TSS1500;Body;Body;Body	TRUE	No
cg01882991	1.09e-10	-----	1.77585e-07	6	6677756			TRUE	No
cg01015663	1.12e-10	-----	1.81226e-07	1	23729692	TCEA3	Body	TRUE	No
cg16391678	1.12e-10	-----	1.81226e-07	16	30485597	ITGAL;ITGAL	Body;Body	TRUE	No
cg26908328	1.13e-10	-----	1.82015e-07	5	79552537	SERINC5	TSS1500	TRUE	No
cg07413467	1.13e-10	+++++	1.82015e-07	7	92238086	CDK6;CDK6	3'UTR;3'UTR	TRUE	No
cg13916835	1.14e-10	-----	1.8321e-07	17	2078431	SMG6;SMG6	Body;Body	TRUE	No
[truncated: 1,350 more rows]

## Sheet: S2
Additional file 2: Table S2. Statistically significant CpGs in relation to current vs. non smoking status at a Bonferroni adjusted threshold (P-value = 6.25 x 10-8)
IlmnID	P-value	Effect (+ hypermethylation, - hypomethylation)	Effect size	FDR	Chr	Mapinfo	Gene	Location	Island location	Annotation	In 450k	Novel	Replicated in SHS
cg21566642	1.63e-121	-----	-0.160375	1.15786e-115	2	233284661			Island		TRUE	No
cg01940273	1.09e-109	-----	-0.150768	3.87136e-104	2	233284934			Island		TRUE	No
cg05575921	2.9e-99	-----	-0.2461	6.86663e-94	5	373378	AHRR	Body	N_Shore	Enhancer	TRUE	No
cg14391737	1.97e-92	-----	-0.176125	3.49843e-87	11	86513429	PRSS23	5'UTR;Body;Body;5'UTR;Body;Body;Body	S_Shore		FALSE	Yes	Yes
cg17739917	6.49e-92	-----	-0.147112	9.22023e-87	17	38477572	RARA	5'UTR;5'UTR;5'UTR	S_Shelf	Enhancer	FALSE	Yes	Yes
cg17087741	1.1e-70	-----	-0.0379842	1.30229e-65	2	233283010			N_Shore		TRUE	No
cg00475490	1.06e-67	-----	-0.0456343	1.07566e-62	11	86517110	PRSS23	5'UTR;Body;Body;5'UTR;Body;Body;Body			FALSE	Yes	Yes
cg16841366	2.45e-66	-----	-0.140122	2.17542e-61	2	233286192			S_Shore		FALSE	Yes	Yes
cg18110140	3.24e-63	-----	-0.119921	2.55723e-58	15	75350380					FALSE	Yes	Yes
cg00045592	1.39e-59	-----	-0.103679	9.87374e-55	1	160714299	SLAMF7	5'UTR;Body;Body;Body;Body;Body;Body;Body;Body;Body		Enhancer	FALSE	Yes	Yes
cg26703534	7.91e-59	-----	-0.0837301	5.108e-54	5	377358	AHRR	Body	S_Shelf		TRUE	No
cg05284742	7.81e-56	-----	-0.0616571	4.62314e-51	14	93552128	ITPK1	Body;Body;Body		Enhancer	TRUE	No
cg11660018	1.81e-54	-----	-0.0896595	9.89013e-50	11	86510915	PRSS23	TSS1500	N_Shore		TRUE	No
cg24859433	1.44e-51	-----	-0.0360517	7.30636e-47	6	30720203					TRUE	No
cg09935388	9.24e-51	-----	-0.136439	4.3757e-46	1	92947588	GFI1	Body;Body;Body	Island		TRUE	No
cg25648203	1.02e-50	-----	-0.058705	4.52842e-46	5	395444	AHRR	Body		Enhancer	TRUE	No
cg23079012	5.2e-49	-----	-0.0477526	2.17281e-44	2	8343710					TRUE	No
cg25189904	3.81e-47	-----	-0.142476	1.50356e-42	1	68299493	GNG12	TSS1500	S_Shore		TRUE	No
cg05086879	1.06e-45	-----	-0.0566542	3.96296e-41	22	39861490	MGAT3	5'UTR		Enhancer	FALSE	Yes	Yes
cg14753356	9.64e-45	-----	-0.0729398	3.42384e-40	6	30720108					TRUE	No
cg04551776	2.36e-44	-----	-0.0513478	7.98288e-40	5	393366	AHRR	Body		Enhancer	TRUE	No
cg23161492	2.17e-40	-----	-0.0739949	7.00655e-36	15	90357202	ANPEP	5'UTR	N_Shore		TRUE	No
cg21611682	9.4e-40	-----	-0.0565711	2.90313e-35	11	68138269	LRP5	Body		Enhancer	TRUE	No
cg13193840	1.89e-39	-----	-0.0301254	5.59394e-35	2	233285289			Island	Promoter	TRUE	No
cg09010260	2.12e-39	-----	-0.067621	6.02369e-35	12	54842484	LOC102724050	Body;Body			FALSE	Yes	Yes
cg24797066	4.66e-38	-----	-0.0433563	1.27315e-33	20	48407084					FALSE	Yes	Yes
cg09945032	4.71e-37	-----	-0.0485808	1.23915e-32	3	38871019					FALSE	Yes	Yes
cg07741821	1.87e-36	-----	-0.0631879	4.74406e-32	7	26577897	KIAA0087	Body			FALSE	Yes	Yes
cg02738868	2.78e-35	-----	-0.0264272	6.80948e-31	14	74221164	ELMSAN1	5'UTR;5'UTR		Enhancer	FALSE	Yes	Yes
cg05934812	3.88e-35	-----	-0.0581561	9.18708e-31	5	334322	AHRR	Body;Body		Promoter	FALSE	Yes	Yes
cg25001882	4.98e-35	-----	-0.0440932	1.14113e-30	14	78619077					FALSE	Yes	Yes
cg25845814	6.73e-35	-----	-0.0302672	1.49394e-30	14	74224613	ELMSAN1	TSS1500;5'UTR;5'UTR	N_Shore	Promoter	FALSE	Yes	Yes
cg12803068	1.09e-34	+++++	0.0566554	2.34628e-30	7	45002919	MYO1G	Body	S_Shore		TRUE	No
cg09338374	2.37e-34	+++++	0.0332161	4.95149e-30	22	39888390			S_Shelf		FALSE	Yes	Yes
cg27241845	2.85e-34	-----	-0.0688826	5.78421e-30	2	233250370			N_Shore		TRUE	No
cg09834951	1.48e-33	-----	-0.0425955	2.92029e-29	19	1265877			Island	Promoter	FALSE	Yes	Yes
cg19885130	1.56e-33	----?	-0.108247	2.99495e-29	11	68146832	LRP5	5'UTR;Body		Enhancer	FALSE	Yes	Yes
cg00073090	4.79e-33	-----	-0.0405656	8.95404e-29	19	1265879			Island	Promoter	TRUE	No
cg15159987	5.89e-32	-----	-0.0460766	1.0728e-27	19	17003890	CPAMD8	3'UTR	N_Shelf	Enhancer	TRUE	No
cg07339236	6.76e-32	-----	-0.0172857	1.20048e-27	20	50312490	ATP9A	Body			TRUE	No
cg13258799	2.73e-31	-----	-0.0568057	4.72983e-27	15	28413705	HERC2	Body			FALSE	Yes	Not tested
cg02978227	4.67e-31	-----	-0.0166555	7.89832e-27	3	98292027				Enhancer	FALSE	Yes	Yes
cg21322436	9.41e-31	---?-	-0.0316381	1.55449e-26	7	145812842	CNTNAP2	TSS1500	N_Shore		TRUE	No
cg17287155	2.73e-30	---?-	-0.0389626	4.40734e-26	5	393347	AHRR	Body		Enhancer	TRUE	No
cg22440155	2.97e-30	+++++	0.0288294	4.68825e-26	19	2664262	GNG7	5'UTR		Enhancer	FALSE	Yes	Yes
cg04885881	7.41e-30	-----	-0.0758183	1.14427e-25	1	11123118			S_Shelf	Enhancer	TRUE	No
cg25197654	7.79e-30	-----	-0.03796	1.17735e-25	8	21914006	DTMN	TSS1500;5'UTR;5'UTR;5'UTR;5'UTR	N_Shore	Enhancer	FALSE	Yes	Yes
cg10765427	1.65e-29	-----	-0.0368556	2.4418e-25	19	17005225	CPAMD8	Body	N_Shore	Enhancer	FALSE	Yes	Yes
cg11902777	2.89e-29	-----	-0.0132405	4.18956e-25	5	368843	AHRR	Body	N_Shore	Enhancer	TRUE	No
cg00501876	6.54e-29	-----	-0.0291553	9.29126e-25	3	39193251	CSRNP1	5'UTR	N_Shore	Enhancer	TRUE	No
cg01692968	2.14e-28	-----	-0.0684757	2.98065e-24	9	108005349			N_Shore	Enhancer	TRUE	No
cg07986378	1.19e-27	-----	-0.0646657	1.62559e-23	12	11898284	ETV6	Body		Enhancer	TRUE	No
cg25558667	1.41e-27	-----	-0.10651	1.86793e-23	X	10075110	WWC3	Body		Enhancer	FALSE	Yes	Not tested
cg07251887	1.42e-27	-----	-0.0480367	1.86793e-23	17	73641809	LOC100130933;RECQL5	TSS1500;Body		Enhancer	TRUE	No
cg17738628	4.29e-27	-----	-0.0283875	5.54066e-23	15	67155520					FALSE	Yes	Yes
cg14580211	6.59e-27	-----	-0.0634027	8.35919e-23	5	150161299	C5orf62	Body	S_Shelf	Enhancer	TRUE	No
cg27537125	1.3e-26	-----	-0.0208303	1.62008e-22	1	25349681				Enhancer	TRUE	No
cg05009104	1.5e-26	+++++	0.0306434	1.83709e-22	7	45002980	MYO1G	Body	S_Shore		FALSE	Yes	Yes
cg26673040	3.6e-26	-----	-0.0226252	4.33428e-22	2	67157193	LOC101060019	Body			FALSE	Yes	Yes
cg05533761	5.62e-26	----?	-0.099972	6.65353e-22	11	86437953					FALSE	Yes	Yes
cg26963277	1.27e-25	-----	-0.0371023	1.47891e-21	11	2722407	KCNQ1OT1;KCNQ1;KCNQ1	TSS1500;Body;Body	S_Shore	Promoter	TRUE	No
cg24577031	1.64e-25	-----	-0.0482134	1.87897e-21	15	75023481					FALSE	Yes	Yes
cg18316974	1.94e-25	-----	-0.0475556	2.1874e-21	1	92947035	GFI1;GFI1;GFI1	Body;Body;Body	Island		TRUE	No
cg12876356	2.28e-25	-----	-0.0928399	2.53059e-21	1	92946825	GFI1;GFI1;GFI1	Body;Body;Body	Island		TRUE	No
cg14096828	4.66e-25	-----	-0.0274811	5.0926e-21	7	110731116	LRRN3;IMMP2L	1stExon;1stExon;1stExon;5'UTR;5'UTR;5'UTR;Body;Body			FALSE	Yes	Yes
cg07943658	5.24e-25	+++++	0.0514437	5.63968e-21	5	352001	AHRR	Body;Body			FALSE	Yes	Yes
cg11207515	6.23e-25	+++++	0.0604263	6.60511e-21	7	146904205	CNTNAP2	Body			TRUE	No
cg04535902	7.72e-25	-----	-0.050392	8.06446e-21	1	92947332	GFI1;GFI1;GFI1	Body;Body;Body	Island		TRUE	No
cg10750182	1.11e-24	-----	-0.0409523	1.14272e-20	10	73497514	C10orf105;C10orf105;CDH23	5'UTR;1stExon;Body		Enhancer	TRUE	No
cg26361535	1.27e-24	-----	-0.0590314	1.28876e-20	8	144576604	ZC3H3	Body			TRUE	No
cg08709672	1.47e-24	-----	-0.0353852	1.47071e-20	1	206224334	AVPR1B;AVPR1B	5'UTR;1stExon	S_Shore		TRUE	No
cg12806681	4.81e-24	-----	-0.0220866	4.74547e-20	5	368394	AHRR	Body	N_Shore	Enhancer	TRUE	No
cg11554391	2.28e-23	-----	-0.0216592	2.2186e-19	5	321320	AHRR	Body	Island	Promoter	TRUE	No
cg07812250	2.72e-23	-----	-0.0686663	2.61098e-19	16	15601462	C16orf45	Body;Body			FALSE	Yes	Yes
cg00310412	3.06e-23	-----	-0.0386529	2.89819e-19	15	74724918	SEMA7A;SEMA7A;SEMA7A	Body;Body;5'UTR	N_Shore	Promoter	TRUE	No
cg24171547	6.72e-23	-----	-0.0317223	6.23624e-19	11	118753670	CXCR5	TSS1500		Promoter	FALSE	Yes	Yes
cg24090911	6.76e-23	-----	-0.0294184	6.23624e-19	5	400732	AHRR	Body		Enhancer	TRUE	No
cg06708913	7.92e-23	-----	-0.0100528	7.21269e-19	12	90274556				Enhancer	FALSE	Yes	Yes
cg22222502	8.57e-23	-----	-0.0295998	7.70585e-19	5	150161551	SMIM3	5'UTR	S_Shelf	Enhancer	FALSE	Yes	Yes
cg25212025	1.03e-22	-----	-0.0553302	9.14564e-19	10	34602937	PARD3	Body			TRUE	No
cg06421013	2.25e-22	-----	-0.0653486	1.97317e-18	20	19194143	SLC24A3	Body	S_Shore		FALSE	Yes	Yes
cg23407476	8.82e-22	-----	-0.0352642	7.6405e-18	7	45019461	MYO1G	TSS1500		Enhancer	FALSE	Yes	Yes
cg25061445	1.03e-21	-----	-0.0443171	8.7947e-18	15	57912784	GCOM1	Body;Body;Body;Body;Body;Body;Body;Body;Body;Body			FALSE	Yes	Yes
cg05221370	1.04e-21	-----	-0.0217308	8.7947e-18	7	110738836	LRRN3;IMMP2L;LRRN3;LRRN3	5'UTR;Body;5'UTR;5'UTR			TRUE	No
cg02583484	1.06e-21	-----	-0.0381207	8.85837e-18	12	54677008	HNRNPA1;HNRPA1L-2;HNRNPA1	Body;Body;Body	S_Shelf	Promoter	TRUE	No
cg04414766	2.49e-21	+++++	0.0778392	2.05668e-17	3	22412963			N_Shore		FALSE	Yes	Yes
cg18146737	3.09e-21	---?-	-0.0630478	2.52294e-17	1	92946700	GFI1;GFI1;GFI1	Body;Body;Body	Island		TRUE	No
cg14624207	3.5e-21	-----	-0.0383569	2.82522e-17	11	68142198	LRP5	Body			TRUE	No
cg20294744	3.99e-21	-----	-0.0263156	3.18456e-17	13	48978285	RB1	Body		Enhancer	FALSE	Yes	Yes
cg23916896	6e-21	-----	-0.0540592	4.73561e-17	5	368804	AHRR	Body	N_Shore	Enhancer	TRUE	No
cg11931220	6.58e-21	-----	-0.0551786	5.13631e-17	12	49276387					FALSE	Yes	Yes
cg23583523	1.01e-20	-----	-0.0438107	7.79831e-17	11	118087893	AMICA1;AMICA1	5'UTR;5'UTR		Promoter	FALSE	Yes	Yes
cg03028088	1.2e-20	-----	-0.0431211	9.16569e-17	10	63843221	ARID5B;ARID5B	Body;Body		Enhancer	FALSE	Yes	Yes
cg16758086	1.65e-20	+++++	0.0179866	1.24688e-16	1	6173356	CHD5	Body			FALSE	Yes	Yes
cg01901332	3.58e-20	-----	-0.0418345	2.67686e-16	11	75031054	ARRB1;ARRB1	Body;Body			TRUE	No
cg23068081	3.65e-20	-----	-0.0486329	2.70078e-16	2	109268809	LIMS1;LIMS1;LIMS1;LIMS1;LIMS1	5'UTR;5'UTR;Body;Body;Body		Enhancer	FALSE	Yes	Yes
cg26764244	3.74e-20	-----	-0.029634	2.73884e-16	1	68299511	GNG12	TSS1500	S_Shore		TRUE	No
cg24049493	4.41e-20	+++++	0.0583719	3.19653e-16	1	42385941	HIVEP3;HIVEP3	TSS1500;TSS1500	S_Shore	Enhancer	TRUE	No
cg02451831	5.24e-20	-----	-0.0215356	3.75978e-16	7	26578098	KIAA0087	Body			TRUE	No
cg14120703	7.64e-20	-----	-0.0234321	5.39437e-16	9	139416102	NOTCH1	Body	N_Shore		TRUE	No
cg20059012	7.67e-20	----?	-0.04022	5.39437e-16	12	53613154	RARG;RARG	Body;Body	N_Shore	Enhancer	TRUE	No
cg21140898	8.57e-20	-----	-0.0412993	5.96826e-16	1	51442318			N_Shore	Promoter	TRUE	No
cg16145216	1.05e-19	+++++	0.0356526	7.24134e-16	1	42385662	HIVEP3;HIVEP3	TSS1500;TSS1500	S_Shore	Enhancer	TRUE	No
cg18158149	1.32e-19	-----	-0.060037	9.01587e-16	1	162138215	NOS1AP;NOS1AP	Body;Body			FALSE	Yes	Yes
cg23090529	1.92e-19	-----	-0.072585	1.29891e-15	1	51442133			N_Shore	Promoter	TRUE	No
cg22675726	2.05e-19	-----	-0.0732594	1.36757e-15	18	3179889	MYOM1;MYOM1	Body;Body		Enhancer	FALSE	Yes	Yes
cg05753553	2.06e-19	+++++	0.0247425	1.36757e-15	17	2689486					FALSE	Yes	Yes
cg20174472	2.4e-19	-----	-0.0124407	1.57854e-15	20	61283288	SLCO4A1	5'UTR		Promoter	FALSE	Yes	Yes
cg13525276	2.66e-19	+++++	0.0323129	1.73349e-15	14	81426012	TSHR;TSHR;TSHR	Body;Body;Body		Enhancer	TRUE	No
cg04180046	2.83e-19	+++++	0.0589853	1.82751e-15	7	45002736	MYO1G	Body	Island		TRUE	No
cg17619755	4.69e-19	+++++	0.0311908	3.00135e-15	6	31760629	VARS	Body	N_Shelf	Enhancer	TRUE	No
cg22551157	4.92e-19	-----	-0.0374748	3.10538e-15	12	66342368	HMGA2;HMGA2	Body;Body			FALSE	Yes	Yes
cg01127300	4.94e-19	-----	-0.0547101	3.10538e-15	22	38614796			S_Shelf	Enhancer	TRUE	No
cg06831571	7.71e-19	+++++	0.0376928	4.80415e-15	11	34592196					FALSE	Yes	Yes
cg04182427	8.61e-19	-----	-0.0315907	5.31829e-15	7	32315577	PDE1C	Body			FALSE	Yes	Yes
cg09662411	9.02e-19	-----	-0.0521299	5.52351e-15	1	92946132	GFI1;GFI1;GFI1	Body;Body;Body	Island		TRUE	No
cg00731338	9.66e-19	+++++	0.0574868	5.86487e-15	5	346963	AHRR;AHRR	Body;Body	S_Shelf	Enhancer	FALSE	Yes	Yes
cg10788371	1.36e-18	-----	-0.049304	8.18698e-15	11	76381040	LRRC32;LRRC32;LRRC32	5'UTR;1stExon;5'UTR	N_Shore	Promoter	TRUE	No
cg06635952	1.41e-18	+++++	0.0431167	8.41665e-15	2	70025869	ANXA4	Body		Enhancer	TRUE	No
cg21121843	2.09e-18	-----	-0.0579379	1.23718e-14	4	3203982	HTT	Body		Enhancer	TRUE	No
cg07865653	2.45e-18	-----	-0.0393492	1.4265e-14	9	35027046					FALSE	Yes	Yes
cg03253449	2.45e-18	-----	-0.0827131	1.4265e-14	9	14213559	NFIB;NFIB;NFIB	Body;Body;Body			FALSE	Yes	Yes
cg15542713	4.2e-18	+++++	0.0774337	2.42555e-14	1	42385581	HIVEP3;HIVEP3	TSS1500;TSS1500	S_Shore	Promoter	TRUE	No
cg19832381	4.9e-18	-----	-0.0292138	2.80699e-14	6	27776524	HIST1H2BL;HIST1H3H	TSS1500;TSS1500	S_Shore	Promoter	FALSE	Yes	Yes
cg21026639	6.82e-18	-----	-0.0473529	3.87562e-14	12	54656343	CBX5	5'UTR		Enhancer	FALSE	Yes	Yes
cg15088912	1.28e-17	-----	-0.063246	7.21616e-14	13	48987465	LPAR6;LPAR6;LPAR6;LPAR6;RB1	1stExon;5'UTR;5'UTR;5'UTR;Body		Promoter	FALSE	Yes	Yes
cg20146909	1.34e-17	-----	-0.0238474	7.49494e-14	1	90289611	LRRC8D;LRRC8D	5'UTR;5'UTR	S_Shelf	Promoter	TRUE	No
cg16611234	1.93e-17	-----	-0.0485216	1.07106e-13	11	58870075			Island	Enhancer	TRUE	No
cg17419818	2.36e-17	-----	-0.0553946	1.29954e-13	8	103120736	NCALD;NCALD;NCALD;NCALD;NCALD;NCALD;NCALD	5'UTR;5'UTR;5'UTR;5'UTR;5'UTR;5'UTR;5'UTR		Enhancer	FALSE	Yes	Yes
cg01731783	2.41e-17	-----	-0.019646	1.31223e-13	14	74211788	C14orf43;C14orf43	5'UTR;5'UTR		Enhancer	TRUE	No
cg21393163	2.42e-17	-----	-0.013948	1.31223e-13	1	12217629				Enhancer	TRUE	No
cg26271591	3.79e-17	-----	-0.0571534	2.03954e-13	2	178125956	NFE2L2;NFE2L2;NFE2L2	Body;5'UTR;5'UTR	N_Shelf	Promoter	TRUE	No
cg01237738	4.43e-17	-----	-0.010032	2.36602e-13	11	102322056	TMEM123	Body	N_Shore	Promoter	FALSE	Yes	Yes
cg08035323	4.7e-17	+++++	0.0385471	2.49149e-13	2	9843525					TRUE	No
cg00871610	5.01e-17	-----	-0.0541373	2.63615e-13	21	37093012	MIR802	Body			TRUE	No
cg01010073	6.75e-17	-----	-0.0580589	3.52559e-13	7	45065573	CCM2;CCM2;CCM2;CCM2	Body;Body;Body;Body		Enhancer	FALSE	Yes	Yes
cg03707168	7.54e-17	-----	-0.0313805	3.90947e-13	19	49379127	PPP1R15A	Body	S_Shelf	Enhancer	TRUE	No
cg24616450	7.66e-17	+++++	0.0218201	3.94291e-13	1	19940140	MINOS1;MINOS1;MINOS1-NBL1;MINOS1;MINOS1;MINOS1;MINOS1-NBL1	Body;Body;5'UTR;Body;Body;Body;Body			FALSE	Yes	Nominally
cg13039251	8.16e-17	+++++	0.034356	4.17006e-13	5	32018601	PDZD2	Body		Enhancer	TRUE	No
cg10807309	8.52e-17	+++++	0.0216201	4.32293e-13	6	31761062	VARS	Body	N_Shelf	Enhancer	TRUE	No
cg17805294	8.6e-17	-----	-0.0366847	4.33258e-13	18	43408770	SIGLEC15	Body		Enhancer	FALSE	Yes	Yes
cg20832643	1e-16	-----	-0.0211674	5.0024e-13	6	111873828	TRAF3IP2-AS1;TRAF3IP2-AS1;TRAF3IP2-AS1	Body;Body;Body			FALSE	Yes	Yes
cg02786339	1.16e-16	-----	-0.0567507	5.76221e-13	10	79373331	KCNMA1;KCNMA1;KCNMA1;KCNMA1;KCNMA1;KCNMA1	Body;Body;Body;Body;Body;Body			FALSE	Yes	Yes
cg09837977	2.01e-16	-----	-0.0171823	9.91518e-13	7	110731201	LRRN3;LRRN3;IMMP2L;LRRN3;LRRN3;LRRN3;LRRN3	5'UTR;1stExon;Body;5'UTR;1stExon;1stExon;5'UTR			TRUE	No
cg23508991	2.71e-16	-----	-0.033551	1.3276e-12	13	30694031				Enhancer	FALSE	Yes	Yes
cg25054107	3.06e-16	-----	-0.0077593	1.4888e-12	20	43201588	PKIG;PKIG;PKIG;PKIG	5'UTR;5'UTR;5'UTR;5'UTR			FALSE	Yes	Yes
cg24838345	3.27e-16	-----	-0.0188897	1.57427e-12	8	125737353	MTSS1	Body	N_Shelf		TRUE	No
cg13705457	3.28e-16	+++++	0.0373252	1.57427e-12	11	34592254					FALSE	Yes	Nominally
cg07178945	3.71e-16	+++++	0.025929	1.76165e-12	12	4488800	FGF23;FGF23	5'UTR;1stExon			TRUE	No
cg19701538	3.72e-16	-----	-0.0531121	1.76165e-12	16	17474952	XYLT1	Body		Enhancer	FALSE	Yes	Yes
cg06053307	4.22e-16	-----	-0.0410696	1.98519e-12	6	111873688	TRAF3IP2-AS1;TRAF3IP2-AS1;TRAF3IP2-AS1	Body;Body;Body			FALSE	Yes	Yes
cg07663850	4.52e-16	-----	-0.033721	2.11233e-12	7	5517419	FBXL18	3'UTR	N_Shelf		FALSE	Yes	Yes
cg06235438	4.72e-16	-----	-0.0210575	2.19138e-12	16	30485966	ITGAL;ITGAL	Body;Body	S_Shore	Promoter	TRUE	No
cg25730803	5.12e-16	-----	-0.0445022	2.36165e-12	22	43150790					FALSE	Yes	Yes
cg17907003	5.82e-16	-----	-0.0345293	2.66722e-12	1	117533414					TRUE	No
cg02743070	7.46e-16	-----	-0.016833	3.39689e-12	10	80834309	ZMIZ1	5'UTR	S_Shelf		TRUE	No
cg10258214	7.6e-16	-----	-0.0607173	3.43859e-12	14	106330534			N_Shelf	Promoter	FALSE	Yes	Yes
cg15310518	8.09e-16	-----	-0.0438978	3.63713e-12	14	106330520			N_Shelf	Promoter	FALSE	Yes	Yes
cg00977926	8.33e-16	+++++	0.0155889	3.72147e-12	5	53411883	ARL15	Body		Enhancer	FALSE	Yes	Yes
cg27271698	1.16e-15	-----	-0.0647744	5.14997e-12	14	106330538			N_Shelf	Promoter	FALSE	Yes	Yes
cg16071219	1.29e-15	-----	-0.0566432	5.69155e-12	13	48986124	LPAR6;LPAR6;RB1;LPAR6	Body;Body;Body;1stExon		Promoter	TRUE	No
cg05875421	1.35e-15	-----	-0.016304	5.91951e-12	14	91709951	GPR68	5'UTR		Enhancer	TRUE	No
cg13937905	1.92e-15	-----	-0.0247886	8.36721e-12	12	53612551	RARG;RARG	Body;Body	N_Shore	Enhancer	TRUE	No
cg21774980	2.02e-15	-----	-0.025725	8.74932e-12	20	34090548	CEP250	Body		Enhancer	FALSE	Yes	Yes
cg16251918	2.15e-15	-----	-0.0157713	9.25596e-12	10	80873603	ZMIZ1	5'UTR			FALSE	Yes	Yes
cg04018738	2.31e-15	+++?+	0.0266754	9.88487e-12	6	31760616	VARS	Body	N_Shelf	Enhancer	TRUE	No
cg04902004	3.01e-15	-----	-0.0291001	1.28032e-11	14	91711165	GPR68;GPR68	TSS1500;5'UTR		Enhancer	FALSE	Yes	Yes
cg23480021	3.42e-15	+++++	0.0563426	1.44605e-11	3	22412746			N_Shore		TRUE	No
cg07803149	3.68e-15	-----	-0.0328833	1.54678e-11	3	45068568	CLEC3B	Body			FALSE	Yes	Yes
cg07667906	4.2e-15	-----	-0.046321	1.75301e-11	14	106329752			N_Shelf	Promoter	FALSE	Yes	Yes
cg00548098	4.22e-15	-----	-0.0388077	1.75301e-11	16	11295667				Enhancer	TRUE	No
cg14513685	4.3e-15	-----	-0.0389258	1.77585e-11	15	92619028	SLCO3A1;SLCO3A1	Body;Body			FALSE	Yes	Nominally
cg12873476	4.94e-15	-----	-0.0326333	2.02837e-11	8	142402728			S_Shore	Promoter	TRUE	No
cg16207944	5.09e-15	-----	-0.0459033	2.07795e-11	14	106331592			N_Shore		FALSE	Yes	Yes
cg08149865	5.19e-15	-----	-0.0214295	2.10667e-11	8	21914600	EPB49;EPB49;EPB49;EPB49	TSS1500;5'UTR;5'UTR;5'UTR	S_Shore		TRUE	No
cg15051432	5.31e-15	-----	-0.0265162	2.14313e-11	3	99929690				Enhancer	FALSE	Yes	Yes
cg14712058	5.55e-15	---?-	-0.0236274	2.22734e-11	19	16988083	SIN3B	Body	N_Shore		TRUE	No
cg19089201	5.76e-15	+++++	0.0285426	2.29863e-11	7	45002287	MYO1G	3'UTR	Island		TRUE	No
cg16047567	6.09e-15	-----	-0.0375729	2.41675e-11	1	12664243	DHRS3	Body		Enhancer	TRUE	No
cg15851905	7.2e-15	-----	-0.0452405	2.84136e-11	4	77928471	SEPT11;SEPT11	Body;Body		Enhancer	FALSE	Yes	Yes
cg15480998	8.5e-15	-----	-0.0612029	3.33586e-11	10	79373438	KCNMA1;KCNMA1;KCNMA1;KCNMA1;KCNMA1;KCNMA1	Body;Body;Body;Body;Body;Body			FALSE	Yes	Yes
cg23662846	1.04e-14	-----	-0.0281662	4.05909e-11	15	91416006	FURIN;FURIN;FURIN	5'UTR;5'UTR;TSS200	S_Shore	Enhancer	FALSE	Yes	Yes
cg15885703	1.12e-14	-----	-0.050838	4.34744e-11	11	118094830	AMICA1;AMICA1	5'UTR;5'UTR		Enhancer	FALSE	Yes	Nominally
cg01513913	1.17e-14	-----	-0.0326949	4.51684e-11	14	106329158				Promoter	TRUE	No
cg09981964	1.29e-14	+++++	0.0378908	4.95319e-11	7	148001779	CNTNAP2;MIR548T	Body;Body		Enhancer	FALSE	Yes	Yes
cg23973524	1.3e-14	+++++	0.026588	4.96475e-11	19	18873222	CRTC1;CRTC1	Body;Body	Island		TRUE	No
cg01247535	1.36e-14	-----	-0.0135793	5.16612e-11	6	15418354	JARID2;JARID2	Body;5'UTR			FALSE	Yes	Yes
cg26332838	1.48e-14	-----	-0.0108241	5.59205e-11	12	55840205					FALSE	Yes	Yes
cg17651613	1.58e-14	-----	-0.0506288	5.9383e-11	8	143111540					FALSE	Yes	Yes
cg17290454	1.59e-14	+++++	0.0373595	5.94443e-11	1	210690463	HHAT;HHAT;HHAT;HHAT;HHAT;HHAT	Body;Body;Body;Body;Body;Body			FALSE	Yes	Nominally
cg00819417	1.61e-14	-----	-0.0534644	5.98769e-11	17	29698916	NF1;NF1	Body;Body		Enhancer	FALSE	Yes	Yes
cg09656629	1.63e-14	-----	-0.046071	5.99925e-11	6	162572090	PARK2;PARK2;PARK2	Body;Body;Body			FALSE	Yes	Yes
cg18826637	1.63e-14	-?---	-0.0851325	5.99925e-11	2	145116633				Enhancer	TRUE	No
cg26892401	1.88e-14	-----	-0.0139584	6.88372e-11	7	2847908	GNA12;GNA12;GNA12	Body;Body;Body			FALSE	Yes	Yes
cg11436113	1.9e-14	-----	-0.0276395	6.92127e-11	20	19191145			N_Shore		TRUE	No
cg07097487	1.92e-14	+++++	0.0384818	6.95844e-11	22	47202960	TBC1D22A;TBC1D22A;TBC1D22A;TBC1D22A;TBC1D22A	Body;Body;Body;Body;Body			FALSE	Yes	Yes
cg20244340	1.93e-14	-----	-0.0394165	6.95918e-11	20	19193989	SLC24A3	Body	S_Shore		TRUE	No
cg01208318	2.04e-14	-----	-0.0626577	7.31866e-11	14	106329652			N_Shelf	Promoter	TRUE	No
cg22770911	2.11e-14	-----	-0.0329938	7.53176e-11	10	8101307	GATA3;GATA3	Body;Body	S_Shore	Enhancer	TRUE	No
cg13985437	2.17e-14	-----	-0.0136152	7.7072e-11	11	76381044	LRRC32;LRRC32	5'UTR;TSS200	N_Shore	Promoter	TRUE	No
cg17588460	2.72e-14	-----	-0.0297462	9.61257e-11	11	118090742	AMICA1;AMICA1	5'UTR;5'UTR		Enhancer	FALSE	Yes	Yes
cg17372101	2.84e-14	+++++	0.039562	9.98697e-11	7	147500722	CNTNAP2	Body			TRUE	No
cg25305703	2.9e-14	-----	-0.0560519	1.01477e-10	8	128378218				Enhancer	TRUE	No
cg02920129	2.92e-14	-----	-0.103178	1.01676e-10	3	21792195	ZNF385D	Body			FALSE	Yes	Yes
cg27650500	3.29e-14	-----	-0.0200868	1.14001e-10	1	25298480				Enhancer	FALSE	Yes	Yes
cg15693572	3.39e-14	+++++	0.0575707	1.16896e-10	3	22412385			N_Shore		TRUE	No
cg10358466	4.12e-14	-----	-0.0553313	1.41382e-10	3	168958728	MECOM;MECOM	5'UTR;Body			FALSE	Yes	Yes
cg05445320	4.17e-14	-----	-0.0245959	1.4241e-10	20	45985736	ZMYND8;ZMYND8;ZMYND8;ZMYND8;ZMYND8;ZMYND8;ZMYND8;ZMYND8;ZMYND8;ZMYND8;ZMYND8;ZMYND8;ZMYND8;ZMYND8;ZMYND8;ZMYND8;ZMYND8;ZMYND8	TSS200;TSS200;TSS200;TSS200;TSS200;TSS200;TSS200;TSS200;TSS200;TSS200;TSS200;TSS200;TSS200;TSS200;TSS200;TSS200;TSS200;TSS200		Enhancer	FALSE	Yes	Yes
cg11943735	4.34e-14	+++++	0.0202185	1.47506e-10	4	6260806				Enhancer	FALSE	Yes	Nominally
cg23565821	4.46e-14	-----	-0.0332464	1.50863e-10	6	33385056	CUTA;CUTA;CUTA;CUTA;CUTA	Body;Body;Body;Body;Body	N_Shore	Promoter	TRUE	No
cg16470128	4.73e-14	-----	-0.0270722	1.59157e-10	3	12466092	PPARG;PPARG;PPARG;PPARG	Body;Body;Body;Body			FALSE	Yes	Yes
cg12009405	4.75e-14	-----	-0.0610436	1.59157e-10	6	148651331					FALSE	Yes	Yes
cg15801526	5.69e-14	+++++	0.0151991	1.89758e-10	1	62353410	INADL	Body			FALSE	Yes	Nominally
cg01756827	6.1e-14	+++++	0.0184573	2.0248e-10	20	47923790					FALSE	Yes	Yes
cg02786370	6.58e-14	-----	-0.0343249	2.17397e-10	4	2747928	TNIP2;TNIP2;TNIP2	Body;Body;Body		Enhancer	FALSE	Yes	Yes
cg14316231	7.16e-14	-----	-0.0415661	2.35465e-10	8	41895100	MYST3;MYST3;MYST3	Body;Body;Body		Enhancer	TRUE	No
cg20328799	7.86e-14	+++++	0.0308828	2.57294e-10	2	120985492				Promoter	FALSE	Yes	Yes
cg24771152	8e-14	+++++	0.0130093	2.60676e-10	6	31760608	VARS	Body	N_Shelf	Enhancer	TRUE	No
cg10179300	8.39e-14	-----	-0.0152209	2.72135e-10	5	14147618	TRIO	Body	S_Shelf	Enhancer	TRUE	No
cg04455670	8.81e-14	-----	-0.0501247	2.84459e-10	4	169803020	PALLD;PALLD;PALLD;PALLD	Body;Body;Body;Body	S_Shelf		FALSE	Yes	Yes
cg05157376	9.48e-14	-----	-0.0440114	3.04707e-10	1	92781750	RPAP2	Body			FALSE	Yes	Yes
cg25953130	9.58e-14	-----	-0.0681632	3.06535e-10	10	63753550	ARID5B	Body		Enhancer	TRUE	No
cg03977382	1.17e-13	-----	-0.0341766	3.71026e-10	11	99564911	CNTN5;CNTN5;CNTN5;CNTN5	Body;Body;Body;Body			FALSE	Yes	Yes
cg05460226	1.17e-13	-----	-0.0529355	3.71026e-10	17	8804279	PIK3R5;PIK3R5	Body;Body		Enhancer	TRUE	No
cg07202214	1.2e-13	-----	-0.0283973	3.77172e-10	11	76381081	LRRC32;LRRC32	5'UTR;TSS200	N_Shore	Promoter	TRUE	No
cg10062919	1.2e-13	-----	-0.0199647	3.77172e-10	17	38503802	RARA;RARA;RARA;RARA	Body;Body;Body;Body	S_Shore	Enhancer	TRUE	No
cg20059928	1.4e-13	-----	-0.044655	4.38096e-10	15	40361485				Enhancer	TRUE	No
cg15396830	1.42e-13	-----	-0.0877021	4.42405e-10	4	90224479	GPRIN3	5'UTR			FALSE	Yes	Yes
cg05547483	1.5e-13	----?	-0.0641534	4.65289e-10	7	80741676					FALSE	Yes	Yes
cg15474579	1.53e-13	-----	-0.0343542	4.72531e-10	6	36645812	CDKN1A;CDKN1A	TSS1500;TSS1500	N_Shore	Enhancer	TRUE	No
cg02919526	1.75e-13	-----	-0.0221714	5.38137e-10	11	118758721	CXCR5	Body		Promoter	FALSE	Yes	Yes
cg13184736	1.83e-13	-----	-0.0455704	5.60312e-10	1	68299409	GNG12	TSS1500	S_Shore		TRUE	No
cg10814005	2.06e-13	-----	-0.0166985	6.28027e-10	14	91711041	GPR68	5'UTR		Enhancer	TRUE	No
cg04368724	2.07e-13	+++++	0.0157121	6.28379e-10	6	31760593	VARS	Body	N_Shelf	Enhancer	TRUE	No
cg13038618	2.16e-13	-----	-0.0428368	6.52909e-10	14	77467391				Enhancer	TRUE	No
cg23162675	2.93e-13	-----	-0.00353721	8.81906e-10	7	154990285				Enhancer	FALSE	Yes	Yes
cg06521527	3.03e-13	-----	-0.0172969	9.08157e-10	6	11217462	NEDD9;NEDD9;NEDD9;NEDD9;NEDD9	Body;Body;Body;Body;Body			FALSE	Yes	Yes
cg01481251	3.08e-13	-----	-0.0177784	9.19265e-10	11	32912719			N_Shore		TRUE	No
cg26242531	3.17e-13	+++++	0.0244857	9.42168e-10	14	104190678	ZFYVE21	Body	N_Shelf		TRUE	No
cg02775989	3.3e-13	+++++	0.0153096	9.76719e-10	17	47465656				Enhancer	FALSE	Yes	Yes
cg14768892	3.48e-13	-----	-0.0448419	1.02572e-09	15	39915931	FSIP1	Body		Enhancer	FALSE	Yes	Nominally
cg14335029	3.54e-13	-----	-0.0121269	1.03909e-09	9	134277886					FALSE	Yes	Yes
cg26687886	3.65e-13	+++++	0.0217804	1.06697e-09	17	16891478				Enhancer	FALSE	Yes	Yes
cg12919873	3.92e-13	-----	-0.0546348	1.13655e-09	21	38929815				Enhancer	FALSE	Yes	Yes
cg25290553	3.92e-13	-----	-0.0356001	1.13655e-09	2	129146270					FALSE	Yes	Yes
cg14179389	3.96e-13	---?-	-0.0388745	1.14348e-09	1	92947961	GFI1;GFI1;GFI1	Body;Body;Body	Island	Promoter	TRUE	No
cg08493167	3.98e-13	---?-	-0.0264912	1.1446e-09	14	106329560			N_Shelf	Promoter	FALSE	Yes	Yes
cg08899667	4.11e-13	+++++	0.0139661	1.17722e-09	6	31761055	VARS	Body	N_Shelf	Enhancer	TRUE	No
cg27521648	4.16e-13	-----	-0.0117486	1.18675e-09	3	98293016				Enhancer	FALSE	Yes	Yes
cg05302489	4.25e-13	+++++	0.0102956	1.20758e-09	6	31760426	VARS	Body	N_Shelf	Enhancer	TRUE	No
cg07390844	4.6e-13	-----	-0.0487287	1.30182e-09	18	72935911	TSHZ1;TSHZ1	5'UTR;Body			FALSE	Yes	Yes
cg26931213	4.64e-13	+++++	0.00761744	1.30793e-09	8	23526066					FALSE	Yes	No
cg16959792	4.66e-13	-----	-0.0241643	1.30838e-09	1	155107224	SLC50A1;SLC50A1;SLC50A1;EFNA1;EFNA1;SLC50A1;SLC50A1;SLC50A1;SLC50A1;SLC50A1;SLC50A1;SLC50A1	TSS1500;TSS1500;TSS1500;3'UTR;3'UTR;TSS1500;TSS1500;TSS1500;TSS1500;TSS1500;TSS1500;TSS1500	N_Shore	Promoter	FALSE	Yes	Nominally
cg02532700	4.78e-13	-----	-0.023232	1.33678e-09	22	37257404	NCF4;NCF4	Body;Body		Enhancer	TRUE	No
cg00010201	4.93e-13	----?	-0.0152819	1.37333e-09	3	98287106				Enhancer	FALSE	Yes	Yes
cg11666770	5.37e-13	-----	-0.0476503	1.49005e-09	19	42430910			N_Shore		TRUE	No
cg14491800	5.49e-13	-----	-0.0379067	1.51742e-09	14	77385166				Enhancer	FALSE	Yes	Yes
cg08515723	6.16e-13	-----	-0.0249724	1.69601e-09	3	177256617	LINC00578	Body		Enhancer	FALSE	Yes	Yes
cg01641754	6.39e-13	-----	-0.0404258	1.75254e-09	5	98355983				Enhancer	FALSE	Yes	Yes
cg13682152	6.57e-13	-----	-0.0210494	1.79498e-09	19	16996186					FALSE	Yes	Yes
cg13633560	7e-13	-----	-0.0388353	1.90513e-09	11	76380921	LRRC32;LRRC32;LRRC32	5'UTR;1stExon;5'UTR	N_Shore	Promoter	TRUE	No
cg17342080	7.65e-13	-----	-0.0547583	2.07409e-09	1	9474427				Enhancer	FALSE	Yes	Yes
cg15277721	7.93e-13	-----	-0.0377322	2.14183e-09	8	129243228				Enhancer	FALSE	Yes	Yes
cg02423587	9.01e-13	+++++	0.0103065	2.42431e-09	1	36059379	TFAP2E	Body			FALSE	Yes	Nominally
cg12547807	9.18e-13	-----	-0.0218985	2.46073e-09	1	9473751				Enhancer	TRUE	No
cg16508202	1.01e-12	+++++	0.00393112	2.69716e-09	7	147501016	CNTNAP2	Body			FALSE	Yes	Yes
cg05480247	1.02e-12	+++++	0.0152271	2.71366e-09	8	6669370	XKR5;XKR5	Body;Body		Enhancer	FALSE	Yes	Nominally
cg05866990	1.06e-12	+++++	0.02182	2.80956e-09	11	34592252					FALSE	Yes	Nominally
cg19278199	1.17e-12	-----	-0.0654116	3.08959e-09	4	143324267	INPP4B;INPP4B	Body;Body			FALSE	Yes	Yes
cg06566669	1.18e-12	-----	-0.0498531	3.10445e-09	10	129536394	FOXI2	Body	Island		FALSE	Yes	Yes
cg10092685	1.27e-12	-----	-0.0327114	3.3289e-09	16	73090591	ZFHX3	5'UTR	N_Shore	Enhancer	FALSE	Yes	Yes
cg20540629	1.29e-12	-----	-0.015427	3.3689e-09	17	46318630	SKAP1;SKAP1	Body;Body		Enhancer	FALSE	Yes	Yes
cg01272202	1.3e-12	-----	-0.0195231	3.38258e-09	5	112716899	MCC	Body			TRUE	No
cg24996979	1.34e-12	-----	-0.0153019	3.47393e-09	14	74223355	C14orf43;C14orf43	5'UTR;5'UTR	N_Shelf	Enhancer	TRUE	No
cg14128479	1.35e-12	-----	-0.00865121	3.48713e-09	8	126522705				Enhancer	FALSE	Yes	Yes
cg17547179	1.43e-12	-----	-0.0192914	3.65391e-09	7	45068955	CCM2;CCM2;CCM2;CCM2;CCM2	Body;Body;Body;Body;Body		Enhancer	FALSE	Yes	Yes
cg22891595	1.43e-12	+++++	0.0262005	3.65391e-09	3	193570256					TRUE	No
cg13976502	1.43e-12	-----	-0.0279736	3.65391e-09	14	74227875	C14orf43;C14orf43	5'UTR;TSS1500	S_Shore	Enhancer	TRUE	No
cg15241876	1.47e-12	-----	-0.0276863	3.74266e-09	22	37257594	NCF4;NCF4	Body;Body		Enhancer	FALSE	Yes	Yes
cg07090714	1.58e-12	-----	-0.0206835	4.00835e-09	6	6857062				Enhancer	TRUE	No
cg21163477	1.61e-12	-----	-0.0132881	4.06993e-09	16	17439164	XYLT1	Body		Enhancer	FALSE	Yes	Yes
cg16143121	1.65e-12	+++++	0.0305387	4.15625e-09	13	30929119	LINC00426	Body			FALSE	Yes	Nominally
cg02610360	1.71e-12	+++++	0.0457887	4.29217e-09	11	120197521	TMEM136	5'UTR	S_Shore	Promoter	TRUE	No
cg23594345	1.75e-12	-----	-0.0768437	4.3771e-09	14	106329607			N_Shelf	Promoter	TRUE	No
cg03547355	1.8e-12	-----	-0.0286936	4.48636e-09	1	227003060					TRUE	No
cg09197783	1.87e-12	-----	-0.0277626	4.64454e-09	11	57176720	SLC43A3;SLC43A3;SLC43A3	Body;Body;Body			TRUE	No
cg20184330	1.97e-12	-----	-0.0363326	4.87586e-09	14	74228393	ELMSAN1;ELMSAN1	TSS1500;5'UTR	S_Shore	Enhancer	FALSE	Yes	Yes
cg13787850	1.99e-12	-----	-0.0438853	4.90826e-09	9	102195951				Enhancer	TRUE	No
cg10691866	2.03e-12	-----	-0.0500243	4.98959e-09	7	65817282	TPST1	Body			TRUE	No
cg11320225	2.14e-12	-----	-0.029075	5.24183e-09	1	161709963				Enhancer	FALSE	Yes	Yes
cg25520710	2.2e-12	-----	-0.0476723	5.37028e-09	20	45981300	ZMYND8;ZMYND8;ZMYND8;ZMYND8;ZMYND8;ZMYND8;ZMYND8;ZMYND8;ZMYND8;ZMYND8;ZMYND8;ZMYND8;ZMYND8;ZMYND8;ZMYND8;ZMYND8;ZMYND8;ZMYND8	5'UTR;5'UTR;5'UTR;5'UTR;5'UTR;Body;Body;Body;Body;Body;Body;Body;Body;Body;Body;Body;Body;Body		Promoter	FALSE	Yes	Yes
cg22014359	2.29e-12	-----	-0.0193433	5.57082e-09	22	39854490	MGAT3	5'UTR	S_Shore	Enhancer	FALSE	Yes	Yes
cg19614811	2.3e-12	----?	-0.0181193	5.57606e-09	3	98250723	GPR15	TSS200		Promoter	TRUE	No
cg12609247	2.35e-12	-----	-0.0370243	5.6779e-09	7	130611417					FALSE	Yes	Yes
cg23409325	2.48e-12	-----	-0.0415083	5.97168e-09	16	11296711				Enhancer	FALSE	Yes	Yes
cg18871648	2.53e-12	-----	-0.0161774	6.0715e-09	14	74227431	ELMSAN1;ELMSAN1	TSS1500;5'UTR	S_Shore	Enhancer	FALSE	Yes	Yes
cg20066188	2.64e-12	-----	-0.0394757	6.31414e-09	22	37678791	CYTH4	Body		Promoter	TRUE	No
cg13074055	2.65e-12	-----	-0.0857909	6.31679e-09	14	106329206				Promoter	TRUE	No
cg27230739	2.66e-12	+++++	0.0361791	6.31942e-09	5	138280522					FALSE	Yes	Nominally
cg18644227	2.72e-12	-----	-0.028932	6.39777e-09	1	161710013				Enhancer	FALSE	Yes	Yes
cg19881433	2.72e-12	-----	-0.0299333	6.39777e-09	7	24922755	OSBPL3;OSBPL3;OSBPL3;OSBPL3;OSBPL3;OSBPL3	Body;Body;Body;Body;Body;Body		Enhancer	FALSE	Yes	Yes
cg20438687	2.72e-12	-----	-0.0256879	6.39777e-09	17	4761644	MINK1;MINK1;MINK1;MINK1	Body;Body;Body;Body			TRUE	No
cg04003530	2.77e-12	+++++	0.0445766	6.49388e-09	12	127981035					FALSE	Yes	Yes
cg03779490	2.99e-12	-----	-0.0412731	6.98658e-09	6	158069542	ZDHHC14;ZDHHC14	Body;Body			FALSE	Yes	Yes
cg13399816	3.05e-12	-----	-0.032415	7.10341e-09	1	68299468	GNG12	TSS1500	S_Shore		TRUE	No
cg13318355	3.08e-12	+++++	0.0120169	7.14984e-09	7	6072034	ANKRD61;EIF2AK1;EIF2AK1	Body;Body;Body			FALSE	Yes	Yes
cg10874644	3.16e-12	+++++	0.0299983	7.31165e-09	5	83898708					TRUE	No
cg10041129	3.38e-12	-----	-0.0201223	7.7953e-09	11	117685550				Enhancer	FALSE	Yes	Yes
cg17309085	3.4e-12	-----	-0.0225091	7.81605e-09	11	99564894	CNTN5;CNTN5;CNTN5;CNTN5	Body;Body;Body;Body			FALSE	Yes	Yes
cg16146513	3.63e-12	+++++	0.0190138	8.31786e-09	19	39801853	LRFN1	Body	N_Shelf		FALSE	Yes	Nominally
cg14241868	3.75e-12	+++++	0.00782193	8.5652e-09	12	57937454	DCTN2;DCTN2;DCTN2	Body;Body;Body	N_Shelf		FALSE	Yes	Nominally
cg14377032	3.82e-12	-----	-0.0342223	8.69712e-09	2	74758236	AUP1;AUP1;AUP1;HTRA2;HTRA2;HTRA2	TSS1500;TSS1500;TSS1500;Body;Body;ExonBnd	S_Shore	Enhancer	FALSE	Yes	Yes
cg22585799	3.96e-12	-----	-0.0504011	8.98706e-09	10	121543364	INPP5F;INPP5F	Body;Body		Enhancer	FALSE	Yes	Yes
cg01097768	4.09e-12	-----	-0.023121	9.25253e-09	5	378854	AHRR	Body		Enhancer	TRUE	No
cg10420527	4.39e-12	-----	-0.0249639	9.89967e-09	11	68138505	LRP5	Body		Enhancer	TRUE	No
cg07381806	5.23e-12	---?-	-0.0534491	1.17566e-08	19	2094327	MOBKL2A	5'UTR	N_Shore	Promoter	TRUE	No
cg14162418	5.26e-12	-----	-0.0110207	1.17867e-08	11	121336707	SORL1	Body		Enhancer	FALSE	Yes	Yes
cg14535553	5.39e-12	-----	-0.0336344	1.20401e-08	16	66995103	CES3;CES3	TSS200;TSS200			FALSE	Yes	Yes
cg11307144	5.43e-12	-----	-0.0290387	1.20914e-08	18	5514289	EPB41L3;EPB41L3;EPB41L3;EPB41L3	5'UTR;5'UTR;5'UTR;5'UTR			FALSE	Yes	Yes
cg21473814	6.11e-12	+++++	0.0267125	1.35631e-08	19	18873268	CRTC1;CRTC1	Body;Body	Island		TRUE	No
cg07256895	6.42e-12	+++++	0.0252576	1.42068e-08	15	56830284					FALSE	Yes	Yes
cg12710546	6.57e-12	+++++	0.0170239	1.44936e-08	7	4773768	FOXK1	Body		Enhancer	FALSE	Yes	Yes
cg10399789	6.66e-12	-----	-0.0445548	1.46467e-08	1	92945668	GFI1;GFI1;GFI1	Body;Body;Body	N_Shore		TRUE	No
cg18105732	6.83e-12	-----	-0.0328977	1.49742e-08	20	12188599					FALSE	Yes	Yes
cg01584377	7.02e-12	+++++	0.01837	1.52963e-08	7	139521372	TBXAS1;TBXAS1	5'UTR;5'UTR			FALSE	Yes	No
cg13343932	7.02e-12	-----	-0.0466725	1.52963e-08	17	76355061	SOCS3;LOC101928674;LOC101928674	Body;TSS1500;TSS1500	Island	Promoter	FALSE	Yes	Yes
cg24556382	7.21e-12	-----	-0.0365557	1.56623e-08	4	174173455	GALNT7	Body		Enhancer	TRUE	No
cg19266329	7.3e-12	-----	-0.0290797	1.58094e-08	1	145456128				Enhancer	TRUE	No
cg24207603	7.56e-12	-----	-0.0401183	1.63227e-08	5	142555986	ARHGAP26;ARHGAP26	Body;Body		Enhancer	FALSE	Yes	Yes
cg24617344	7.69e-12	-----	-0.0222112	1.65531e-08	16	30483713	ITGAL;ITGAL	TSS1500;TSS1500	N_Shore	Enhancer	FALSE	Yes	Yes
cg06338710	8.03e-12	-----	-0.0416393	1.72327e-08	1	92946187	GFI1;GFI1;GFI1	Body;Body;Body	Island		TRUE	No
cg01207684	8.92e-12	-----	-0.0317116	1.90704e-08	16	4103167	ADCY9	Body			TRUE	No
cg24021808	8.94e-12	+++++	0.0440534	1.90704e-08	13	40805588					FALSE	Yes	Yes
cg13849276	9.28e-12	-----	-0.051132	1.97364e-08	17	41328544	NBR1;NBR1;NBR1;NBR1	Body;Body;Body;Body			FALSE	Yes	Yes
cg07265588	9.58e-12	-----	-0.0198474	2.03136e-08	4	6574480			N_Shelf		TRUE	No
cg21990700	1.05e-11	-----	-0.0146725	2.21982e-08	12	7260776	LOC283314;C1RL	TSS200;Body		Promoter	TRUE	No
cg11556164	1.08e-11	-----	-0.0227688	2.27646e-08	7	110738315	LRRN3;IMMP2L;LRRN3;LRRN3	5'UTR;Body;5'UTR;5'UTR			TRUE	No
cg01651583	1.12e-11	+++++	0.0100574	2.34685e-08	10	45899264	ALOX5;ALOX5;ALOX5	Body;Body;Body		Enhancer	FALSE	Yes	Yes
cg12804716	1.12e-11	+++++	0.0237806	2.34685e-08	14	58604949	C14orf37	Body			FALSE	Yes	Yes
cg16556677	1.16e-11	-----	-0.0215389	2.42352e-08	11	2722401	KCNQ1OT1;KCNQ1;KCNQ1	TSS1500;Body;Body	S_Shore	Promoter	TRUE	No
cg09156714	1.17e-11	+++++	0.0137342	2.43724e-08	21	37110991					FALSE	Yes	Yes
cg16255816	1.21e-11	-----	-0.0258145	2.51319e-08	17	39889811	HAP1;HAP1;HAP1	Body;Body;Body	N_Shore		TRUE	No
cg02732789	1.23e-11	-----	-0.0184267	2.54729e-08	16	17491177	XYLT1	Body			FALSE	Yes	Yes
cg25222362	1.25e-11	+++++	0.0348123	2.58118e-08	8	140119546					FALSE	Yes	Nominally
cg26701785	1.3e-11	+++++	0.0192326	2.67665e-08	6	158448455	SYNJ2	Body			TRUE	No
cg12303084	1.4e-11	-----	-0.017898	2.87421e-08	20	45985741	ZMYND8;ZMYND8;ZMYND8	TSS1500;TSS1500;TSS1500		Enhancer	TRUE	No
cg11735008	1.41e-11	+++++	0.0384251	2.8864e-08	1	42380309	HIVEP3;HIVEP3	5'UTR;5'UTR	N_Shelf	Enhancer	TRUE	No
cg07177756	1.43e-11	-----	-0.0292705	2.91893e-08	1	173836307	SNORD75;SNORD78;ZBTB37;ZBTB37;SNORD76;GAS5;SNORD77;SNORD44	TSS1500;TSS1500;TSS1500;TSS1500;TSS1500;Body;TSS1500;TSS1500	N_Shore	Promoter	TRUE	No
cg14262884	1.47e-11	-----	-0.0339432	2.99198e-08	11	43757533	HSD17B12	Body		Enhancer	FALSE	Yes	Yes
cg03340878	1.48e-11	-----	-0.0533344	3.00373e-08	6	27925166	OR2B6	1stExon			TRUE	No
cg25089400	1.49e-11	+++++	0.0295907	3.01541e-08	12	7651706	CD163	Body;Body			FALSE	Yes	Nominally
cg08445278	1.54e-11	+++++	0.010235	3.10774e-08	22	30671877					FALSE	Yes	Yes
cg15068180	1.59e-11	+++++	0.0110307	3.19955e-08	3	194017703			S_Shelf		TRUE	No
cg02008229	1.63e-11	+++++	0.0487992	3.27078e-08	15	90346089	ANPEP	Body			FALSE	Yes	Nominally
cg16220933	1.68e-11	+++++	0.00945606	3.36161e-08	2	197041071				Enhancer	FALSE	Yes	Yes
cg12423733	1.69e-11	+++++	0.0234823	3.37212e-08	6	29454623	MAS1L	1stExon			TRUE	No
cg19719391	1.74e-11	+++++	0.0196674	3.46217e-08	4	26789915					TRUE	No
cg08215583	1.87e-11	-----	-0.0564031	3.71044e-08	6	25166934					FALSE	Yes	Yes
cg08444340	1.88e-11	-----	-0.012824	3.71989e-08	2	149823755	KIF5C	Body;Body			FALSE	Yes	Nominally
cg04517079	1.92e-11	-----	-0.0286058	3.78849e-08	6	41546161	FOXP4	Body;Body;Body			TRUE	No
cg26782583	1.96e-11	+++++	0.0373978	3.8567e-08	3	65398449	MAGI1	Body;Body;Body			FALSE	Yes	No
cg00295485	2.02e-11	-----	-0.0463851	3.96378e-08	2	106755721	UXS1	Body		Enhancer	TRUE	No
cg14214717	2.06e-11	+++++	0.00579379	4.03114e-08	20	5466839				Enhancer	FALSE	Yes	Nominally
cg23034197	2.07e-11	+++++	0.0232471	4.03958e-08	2	205918689	PARD3B	Body;Body;Body;Body			FALSE	Yes	Nominally
cg03604011	2.11e-11	+++?+	0.00497751	4.10635e-08	5	400201	AHRR	Body		Enhancer	TRUE	No
cg16519923	2.12e-11	-----	-0.0265395	4.11454e-08	16	30485810	ITGAL	Body;Body	S_Shore	Promoter	TRUE	No
cg26987759	2.15e-11	+++++	0.0297695	4.15009e-08	5	322546	AHRR	Body;Body	Island	Promoter	FALSE	Yes	Yes
cg18642234	2.15e-11	-----	-0.0237976	4.15009e-08	3	49394622	GPX1	3'UTR;3'UTR;1stExon	N_Shore	Promoter	TRUE	No
cg25614265	2.29e-11	-----	-0.0736586	4.40835e-08	2	223924453					FALSE	Yes	Yes
cg15526732	2.35e-11	-----	-0.0228466	4.51163e-08	14	35883749				Enhancer	FALSE	Yes	Yes
cg22834580	2.38e-11	+++++	0.0248191	4.5569e-08	10	13546267	BEND7	TSS1500;TSS1500			FALSE	Yes	Nominally
cg27573991	2.43e-11	-----	-0.104405	4.64013e-08	1	247712512	C1orf150	1stExon			TRUE	No
cg06034194	2.47e-11	-----	-0.0401107	4.70387e-08	9	12814626	LURAP1L-AS1;LURAP1L	TSS1500;Body			FALSE	Yes	Yes
cg08972170	2.49e-11	+++++	0.0347731	4.72928e-08	7	30185776	C7orf41	Body			TRUE	No
cg18446336	2.65e-11	-----	-0.0648836	5.01974e-08	7	2847575	GNA12	Body			TRUE	No
cg06586615	2.81e-11	---?-	-0.0268085	5.30867e-08	1	155107648	SLC50A1	TSS200;TSS200;TSS200;TSS1500;TSS1500;TSS1500;TSS1500;TSS1500;TSS1500;TSS1500	N_Shore	Promoter	FALSE	Yes	Nominally
cg12329529	2.99e-11	-----	-0.0231	5.63374e-08	11	60822826				Enhancer	FALSE	Yes	Yes
cg10587886	3.01e-11	-----	-0.0635518	5.65642e-08	3	8361835	LMCD1-AS1	Body			FALSE	Yes	Yes
cg15387619	3.08e-11	+++++	0.0394615	5.77269e-08	3	132316156	ACKR4;ACAD11;NPHP3-ACAD11	1stExon;Body;5'UTR;Body			FALSE	Yes	Nominally
cg01868616	3.11e-11	-----	-0.0360899	5.81358e-08	11	75041600	ARRB1	Body;Body			FALSE	Yes	Yes
cg05603985	3.15e-11	-----	-0.0197363	5.8729e-08	1	2161049	SKI	1stExon	Island	Promoter	TRUE	No
cg14977938	3.24e-11	+++++	0.0204923	6.02488e-08	14	104190829	ZFYVE21	Body	N_Shelf		TRUE	No
cg03530002	3.31e-11	-----	-0.0173257	6.13898e-08	9	38026091	SHB	Body			FALSE	Yes	Yes
cg07180646	3.39e-11	-----	-0.0477336	6.27098e-08	1	15481541	TMEM51	5'UTR;5'UTR;5'UTR;5'UTR	S_Shore	Promoter	TRUE	No
cg18060905	3.49e-11	-----	-0.0166617	6.4392e-08	14	106332077			N_Shore		FALSE	Yes	Yes
cg04224247	3.57e-11	-----	-0.0534294	6.56973e-08	X	9984515	WWC3	5'UTR	Island	Promoter	TRUE	No
cg05723029	3.62e-11	+++++	0.0150461	6.64453e-08	18	10896785	PIEZO2	Body		Enhancer	FALSE	Yes	Yes
cg18110714	3.71e-11	-----	-0.0174808	6.79218e-08	2	231846607				Enhancer	FALSE	Yes	Yes
cg09709426	3.72e-11	+++++	0.00777978	6.79298e-08	3	45911521	LZTFL1;LZTFL1	5'UTR;Body		Enhancer	FALSE	Yes	Yes
cg27460040	3.78e-11	-----	-0.0208251	6.88484e-08	8	38648995	TACC1;TACC1;TACC1	Body;Body;5'UTR	S_Shelf	Promoter	TRUE	No
cg05987787	3.8e-11	+++++	0.00156604	6.90357e-08	6	158448508	SYNJ2	Body			TRUE	No
cg20778199	3.91e-11	-----	-0.0352952	7.08529e-08	6	148020881					TRUE	No
cg02372435	3.92e-11	+++++	0.0196458	7.08534e-08	2	2850104					FALSE	Yes	Nominally
cg12999836	4.06e-11	-----	-0.0268957	7.31976e-08	7	50791421	GRB10;GRB10;GRB10	Body;Body;5'UTR			FALSE	Yes	Nominally
cg13832201	4.26e-11	-----	-0.0258411	7.66089e-08	17	19282521	MAPK7;MAPK7;MAPK7;MAPK7	Body;Body;5'UTR;Body	Island	Promoter	TRUE	No
cg01598596	4.38e-11	-----	-0.0468913	7.8568e-08	3	187464648	BCL6	TSS1500	S_Shelf		TRUE	No
cg04700809	4.55e-11	-----	-0.0161529	8.14119e-08	10	80954519	ZMIZ1	5'UTR			FALSE	Yes	Yes
cg00506062	4.87e-11	-----	-0.0436102	8.69186e-08	20	45981165	ZMYND8;ZMYND8;ZMYND8;ZMYND8;ZMYND8;ZMYND8;ZMYND8;ZMYND8;ZMYND8;ZMYND8;ZMYND8;ZMYND8;ZMYND8;ZMYND8;ZMYND8;ZMYND8;ZMYND8;ZMYND8	5'UTR;5'UTR;5'UTR;5'UTR;5'UTR;Body;Body;Body;Body;Body;Body;Body;Body;Body;Body;Body;Body;Body		Promoter	FALSE	Yes	Yes
cg15187398	5.03e-11	-----	-0.0361346	8.95493e-08	19	2093896	MOBKL2A	5'UTR	N_Shore	Promoter	TRUE	No
cg27635797	5.1e-11	-----	-0.0414739	9.03426e-08	1	190445000	BRINP3	5'UTR			FALSE	Yes	Yes
cg10919522	5.1e-11	-----	-0.0219218	9.03426e-08	14	74227441	C14orf43;C14orf43	5'UTR;TSS1500	S_Shore	Enhancer	TRUE	No
cg21095779	5.15e-11	-----	-0.065563	9.10014e-08	3	190336306	IL1RAP;IL1RAP;IL1RAP;IL1RAP;IL1RAP;IL1RAP	Body;Body;Body;Body;Body;Body		Enhancer	FALSE	Yes	Nominally
cg23025288	5.27e-11	-----	-0.0227683	9.28907e-08	2	129278724				Enhancer	FALSE	Yes	Yes
cg23902113	5.33e-11	-----	-0.0246139	9.36598e-08	10	44757323				Enhancer	FALSE	Yes	Yes
cg24540678	5.34e-11	-----	-0.0139432	9.36598e-08	8	28258603			N_Shore	Enhancer	TRUE	No
cg01764256	5.37e-11	-----	-0.0235171	9.3954e-08	20	45985832	ZMYND8;ZMYND8;ZMYND8;ZMYND8;ZMYND8;ZMYND8;ZMYND8;ZMYND8;ZMYND8;ZMYND8;ZMYND8;ZMYND8;ZMYND8;ZMYND8;ZMYND8;ZMYND8;ZMYND8;ZMYND8	TSS200;TSS200;TSS200;TSS200;TSS200;TSS200;TSS200;TSS200;TSS200;TSS200;TSS200;TSS200;TSS200;TSS200;TSS200;TSS200;TSS200;TSS200		Enhancer	FALSE	Yes	Yes
cg15228441	5.42e-11	-----	-0.0176744	9.45958e-08	17	78829930	RPTOR;RPTOR	Body;Body	N_Shore	Enhancer	TRUE	No
cg16142959	5.76e-11	-----	-0.0046088	1.00283e-07	17	38480865	RARA;RARA;RARA	5'UTR;5'UTR;5'UTR		Enhancer	FALSE	Yes	Yes
cg18033416	5.82e-11	-----	-0.0310251	1.0108e-07	17	30592033	RHBDL3	TSS1500	N_Shore		TRUE	No
cg10496919	5.86e-11	-----	-0.0410065	1.01527e-07	15	31460028				Enhancer	FALSE	Yes	Yes
cg23337648	5.98e-11	-----	-0.0245352	1.03354e-07	11	47546192	CELF1;CELF1	5'UTR;TSS1500		Enhancer	FALSE	Yes	Yes
cg01668352	6.27e-11	-----	-0.00901883	1.08103e-07	12	64482597	SRGAP1	Body			TRUE	No
cg11047325	6.34e-11	-----	-0.0564989	1.09045e-07	17	76354934	SOCS3	Body	Island	Promoter	FALSE	Yes	Yes
cg10951873	6.75e-11	-----	-0.00531821	1.15816e-07	1	25254746	RUNX3;RUNX3	Body;Body	N_Shore	Promoter	TRUE	No
cg25323554	6.8e-11	-----	-0.0253727	1.16284e-07	17	27135257	C17orf63;C17orf63	5'UTR;5'UTR	N_Shelf	Enhancer	TRUE	No
cg22573230	6.81e-11	-----	-0.0382402	1.16284e-07	17	7649271	DNAH2	Body			FALSE	Yes	Yes
cg27537214	7e-11	+++++	0.0130463	1.19242e-07	16	73262701					FALSE	Yes	No
cg25730428	7.34e-11	+++++	0.0216786	1.24735e-07	6	29454755	MAS1L	1stExon			TRUE	No
cg01554474	7.39e-11	-----	-0.0238238	1.25284e-07	1	155107599	RAG1AP1;RAG1AP1;RAG1AP1	TSS1500;TSS1500;TSS1500	N_Shore	Promoter	TRUE	No
cg08289839	7.59e-11	+++++	0.019975	1.28064e-07	13	111318640	CARS2	Body			TRUE	No
cg21733098	7.59e-11	-----	-0.0528457	1.28064e-07	12	127931219					TRUE	No
cg07278718	7.61e-11	+++++	0.0165893	1.28097e-07	11	113932635	ZBTB16;ZBTB16	5'UTR;5'UTR	S_Shore		FALSE	Yes	Yes
cg26905258	7.84e-11	-----	-0.0141719	1.31657e-07	13	77898407	MYCBP2	Body	N_Shelf	Promoter	TRUE	No
cg09338136	8.03e-11	-----	-0.0123575	1.34529e-07	5	344057	AHRR	Body	Island	Promoter	TRUE	No
cg05886626	8.18e-11	-----	-0.019672	1.3672e-07	15	39873553	THBS1	5'UTR	Island	Promoter	TRUE	No
cg05613192	8.24e-11	-----	-0.0279304	1.37399e-07	2	223912416					FALSE	Yes	Yes
cg08549335	8.48e-11	-----	-0.0465881	1.4107e-07	7	30387954	ZNRF2	Body		Enhancer	TRUE	No
cg03236789	8.76e-11	+++++	0.0157428	1.45388e-07	7	28045202	JAZF1	Body			FALSE	Yes	No
cg04039397	8.84e-11	-----	-0.0453688	1.46373e-07	3	111260783	CD96;CD96	TSS200;TSS200		Enhancer	TRUE	No
cg14988493	8.98e-11	+++++	0.0194238	1.48346e-07	5	52549628					FALSE	Yes	Nominally
cg05673882	9.45e-11	-----	-0.0367386	1.55748e-07	5	74862702	POLK	Body		Enhancer	TRUE	No
cg26237233	9.92e-11	-----	-0.0238595	1.63115e-07	11	80782064					FALSE	Yes	Yes
cg22403782	1.02e-10	-----	-0.0355085	1.67332e-07	2	233246136	ALPP	Body	Island		TRUE	No
cg02101876	1.04e-10	+++++	0.00136349	1.7022e-07	13	40765110					TRUE	No
cg00711496	1.05e-10	-----	-0.0406112	1.71462e-07	19	50191497	C19orf76;PRMT1;PRMT1;PRMT1	TSS1500;Body;Body;Body	Island		TRUE	No
cg01882991	1.09e-10	-----	-0.0201267	1.77585e-07	6	6677756				Enhancer	TRUE	No
cg01593408	1.12e-10	-----	-0.0389411	1.81226e-07	10	78699706	KCNMA1-AS1;KCNMA1;KCNMA1;KCNMA1;KCNMA1;KCNMA1;KCNMA1	Body;Body;Body;Body;Body;Body;Body			FALSE	Yes	Yes
cg01015663	1.12e-10	-----	-0.0341032	1.81226e-07	1	23729692	TCEA3	Body		Enhancer	TRUE	No
cg16391678	1.12e-10	-----	-0.0186578	1.81226e-07	16	30485597	ITGAL;ITGAL	Body;Body	Island	Enhancer	TRUE	No
cg07413467	1.13e-10	+++++	0.0118767	1.82015e-07	7	92238086	CDK6;CDK6	3'UTR;3'UTR			TRUE	No
cg26908328	1.13e-10	-----	-0.0109291	1.82015e-07	5	79552537	SERINC5	TSS1500	S_Shore	Promoter	TRUE	No
cg13916835	1.14e-10	-----	-0.0449132	1.8321e-07	17	2078431	SMG6;SMG6	Body;Body			TRUE	No
cg21356710	1.16e-10	+++++	0.019207	1.86004e-07	2	24234017	MFSD2B	Body	S_Shore		TRUE	No
cg18625627	1.29e-10	+?+++	0.0266566	2.06383e-07	14	81426015	TSHR;TSHR;TSHR	Body;Body;Body		Enhancer	TRUE	No
cg10965178	1.31e-10	-----	-0.0165126	2.09112e-07	1	43766752	TIE1	1stExon	N_Shelf		TRUE	No
cg13127741	1.32e-10	-----	-0.0343947	2.10235e-07	20	31331821	COMMD7;COMMD7	TSS200;TSS200	S_Shore	Promoter	TRUE	No
cg09069072	1.35e-10	---?-	-0.037183	2.14533e-07	1	15482753	TMEM51;TMEM51;TMEM51;TMEM51	5'UTR;5'UTR;5'UTR;5'UTR	S_Shore	Enhancer	TRUE	No
cg01531127	1.38e-10	-----	-0.00980906	2.1881e-07	17	1269083	YWHAE;YWHAE	Body;Body			FALSE	Yes	No
cg09123897	1.41e-10	----?	-0.063055	2.23069e-07	11	9774828				Enhancer	FALSE	Yes	Yes
cg01307360	1.54e-10	-----	-0.0251947	2.43094e-07	7	32334947	PDE1C	Body	N_Shelf		FALSE	Yes	Yes
cg08902828	1.56e-10	-----	-0.0199162	2.45706e-07	5	400832	AHRR;AHRR	Body;Body		Enhancer	FALSE	Yes	Yes
cg19713429	1.58e-10	-----	-0.017845	2.48305e-07	1	19810690	CAPZB	Body	N_Shore	Promoter	TRUE	No
cg15328025	1.59e-10	-----	-0.0195098	2.48776e-07	1	155107693	SLC50A1;SLC50A1;SLC50A1;SLC50A1;SLC50A1;SLC50A1;SLC50A1;SLC50A1;SLC50A1;SLC50A1	TSS200;TSS200;TSS200;TSS1500;TSS1500;TSS1500;TSS1500;TSS1500;TSS1500;TSS1500	N_Shore	Promoter	FALSE	Yes	Yes
cg02695372	1.59e-10	-----	-0.029706	2.48776e-07	7	106320126					FALSE	Yes	Yes
cg12678834	1.62e-10	-----	-0.0181249	2.52913e-07	11	118753662	CXCR5	TSS1500		Promoter	TRUE	No
cg05655806	1.69e-10	-----	-0.0630817	2.63262e-07	3	111260756	CD96;CD96	TSS200;TSS200		Enhancer	TRUE	No
cg12474798	1.72e-10	-----	-0.0339782	2.67349e-07	10	64565772	ADO;ADO	3'UTR;1stExon	Island	Promoter	TRUE	No
cg18115286	1.74e-10	-----	-0.0480939	2.69868e-07	10	29681408					FALSE	Yes	Yes
cg25942611	1.8e-10	+++++	0.0199312	2.78565e-07	1	66999933	SGIP1;SGIP1;SGIP1;SGIP1	5'UTR;5'UTR;1stExon;ExonBnd	S_Shore		FALSE	Yes	Yes
cg04284610	1.85e-10	-----	-0.00795622	2.85061e-07	21	40181558	ETS2;ETS2	5'UTR;Body	S_Shelf	Enhancer	FALSE	Yes	Yes
cg21885332	1.85e-10	-----	-0.0255098	2.85061e-07	15	67402345	SMAD3	Body		Enhancer	FALSE	Yes	Nominally
cg17439633	1.86e-10	-----	-0.0379098	2.85981e-07	11	57176260	SLC43A3;SLC43A3;SLC43A3;SLC43A3;SLC43A3	Body;Body;Body;Body;Body			FALSE	Yes	Yes
cg19344626	1.88e-10	---?-	-0.0379757	2.88432e-07	19	16830749	NWD1	TSS200		Enhancer	TRUE	No
cg01310332	1.94e-10	+++++	0.00409612	2.95721e-07	12	116799230				Enhancer	FALSE	Yes	Yes
cg13531599	1.94e-10	+++++	0.0135502	2.95721e-07	20	42588358	TOX2;TOX2;TOX2;TOX2	Body;5'UTR;5'UTR;Body		Enhancer	FALSE	Yes	Yes
cg19593285	1.94e-10	-----	-0.0209221	2.95721e-07	20	32267661	E2F1	Body	S_Shelf	Enhancer	TRUE	No
cg09848445	1.95e-10	-----	-0.00535234	2.96609e-07	10	43601862	RET;RET	Body;Body	S_Shore		TRUE	No
cg11487438	1.99e-10	+++++	0.00125081	3.02047e-07	12	57425186	MYO1A;MYO1A	Body;Body		Promoter	FALSE	Yes	Nominally
cg26686403	2.03e-10	-----	-0.00371865	3.07461e-07	14	91710747	GPR68;GPR68;GPR68	5'UTR;1stExon;5'UTR		Enhancer	FALSE	Yes	Yes
cg22851561	2.04e-10	-----	-0.0275401	3.08318e-07	14	74214183	C14orf43;C14orf43	5'UTR;5'UTR		Enhancer	TRUE	No
cg21684640	2.06e-10	+++++	0.01316	3.1068e-07	7	33843957					FALSE	Yes	Yes
cg13645530	2.07e-10	+++?+	0.0174858	3.11527e-07	12	116756948				Enhancer	TRUE	No
cg15964874	2.09e-10	+++++	0.0161522	3.13872e-07	8	8924480				Enhancer	FALSE	Yes	Yes
cg15268992	2.1e-10	+++++	0.00632311	3.14708e-07	13	115029536	CDC16;CDC16	Body;Body			FALSE	Yes	No
cg15562617	2.12e-10	-----	-0.0251826	3.17036e-07	16	80603721	LINC01227;LINC01227	Body;TSS1500		Enhancer	FALSE	Yes	Nominally
cg05113537	2.2e-10	-----	-0.0371901	3.28309e-07	8	103169068				Enhancer	FALSE	Yes	Yes
cg04158018	2.28e-10	-----	-0.0270839	3.39534e-07	12	54696210	NFE2	TSS1500			TRUE	No
cg05659611	2.31e-10	-----	-0.0521942	3.43282e-07	3	98240624	CLDND1;CLDND1;CLDND1;CLDND1;CLDND1;CLDND1	5'UTR;5'UTR;5'UTR;5'UTR;Body;Body	N_Shore	Promoter	FALSE	Yes	Yes
cg16497398	2.36e-10	-----	-0.0235219	3.4998e-07	16	87470083	ZCCHC14	Body			TRUE	No
cg06035956	2.42e-10	-----	-0.00491641	3.5813e-07	5	379099	AHRR;AHRR	Body;Body		Enhancer	FALSE	Yes	Yes
cg13518625	2.45e-10	-----	-0.0121778	3.61816e-07	8	29522838				Enhancer	TRUE	No
cg11219720	2.55e-10	-----	-0.0172651	3.75803e-07	5	453421	EXOC3	Body			FALSE	Yes	Yes
cg16522223	2.59e-10	-----	-0.0160658	3.8012e-07	22	43400443	PACSIN2	5'UTR		Enhancer	FALSE	Yes	Yes
cg09022230	2.59e-10	-----	-0.0316797	3.8012e-07	7	5457225	TNRC18	Body	N_Shore		TRUE	No
cg09279763	2.86e-10	-?---	-0.0649326	4.18881e-07	7	2847477	GNA12;GNA12;GNA12	Body;Body;Body			FALSE	Yes	Yes
cg19372602	2.89e-10	-----	-0.0386675	4.22404e-07	1	156116207				Enhancer	TRUE	No
cg09449447	2.96e-10	+++++	0.0210913	4.31747e-07	21	37891373	CLDN14;CLDN14	5'UTR;5'UTR		Enhancer	FALSE	Yes	Yes
cg05906166	2.98e-10	-----	-0.0513039	4.33774e-07	19	16437057	KLF2	Body	Island	Promoter	TRUE	No
cg04009575	3.02e-10	-----	-0.024086	4.38697e-07	1	160714382	SLAMF7;SLAMF7;SLAMF7;SLAMF7;SLAMF7;SLAMF7;SLAMF7;SLAMF7;SLAMF7;SLAMF7	5'UTR;Body;Body;Body;Body;Body;Body;Body;Body;Body		Enhancer	FALSE	Yes	Nominally
cg10841124	3.07e-10	+++++	0.0154805	4.4505e-07	5	433274	AHRR	Body			TRUE	No
cg13459171	3.17e-10	----?	-0.0224962	4.58611e-07	13	48986750	LPAR6;LPAR6;LPAR6;LPAR6;RB1	1stExon;5'UTR;5'UTR;5'UTR;Body		Promoter	FALSE	Yes	Yes
cg21199085	3.27e-10	+++++	0.0441272	4.72117e-07	15	59469479	MYO1E	Body			FALSE	Yes	Yes
cg21869609	3.3e-10	-----	-0.0560045	4.75482e-07	19	2291613	LINGO3	Body	Island		TRUE	No
cg22232492	3.36e-10	+++++	0.0141046	4.83147e-07	20	12152900					FALSE	Yes	Yes
cg07948323	3.37e-10	+++++	0.0457984	4.83606e-07	4	82609377					FALSE	Yes	Yes
cg15167811	3.38e-10	-----	-0.0364844	4.84063e-07	9	115094058	MIR3134;PTBP3;PTBP3;PTBP3;PTBP3;PTBP3;PTBP3	Body;Body;Body;Body;5'UTR;5'UTR;5'UTR	N_Shore	Promoter	FALSE	Yes	Yes
cg14180330	3.43e-10	-----	-0.0257802	4.90235e-07	5	40224461				Promoter	FALSE	Yes	Yes
cg18383890	3.54e-10	-----	-0.0215928	5.04941e-07	13	100636252	ZIC2	Body	N_Shore		TRUE	No
cg16459171	3.59e-10	+++++	0.00485283	5.11047e-07	5	10295079	CMBL	5'UTR			FALSE	Yes	No
cg20534846	3.61e-10	-----	-0.0612626	5.12866e-07	9	8188954					FALSE	Yes	Yes
cg16646054	3.68e-10	-----	-0.0299109	5.21767e-07	5	150157726	C5orf62	TSS200	N_Shore	Promoter	TRUE	No
cg05726450	3.69e-10	+++++	0.018444	5.22143e-07	17	8771947	PIK3R6;PIK3R6;PIK3R6	TSS1500;TSS1500;TSS1500		Enhancer	FALSE	Yes	Yes
cg01294327	3.77e-10	-----	-0.0673012	5.32403e-07	19	2291373	LINGO3	Body	Island	Promoter	TRUE	No
cg10773266	3.78e-10	-----	-0.0204276	5.32756e-07	10	43895225	HNRNPF;HNRNPF;HNRNPF;HNRNPF	5'UTR;5'UTR;5'UTR;5'UTR	S_Shelf	Enhancer	TRUE	No
cg06362176	3.98e-10	-----	-0.0125594	5.59833e-07	9	127048628	NEK6;NEK6;NEK6;NEK6	Body;5'UTR;5'UTR;5'UTR		Enhancer	FALSE	Yes	Yes
cg05194346	4.17e-10	+++++	0.038822	5.854e-07	15	101305443					TRUE	No
cg19841423	4.33e-10	+++++	0.0253817	6.06662e-07	20	62366755	ZGPAT;ZGPAT;ZGPAT;LIME1	Body;Body;Body;TSS1500	S_Shore		TRUE	No
cg16702313	4.43e-10	-----	-0.013733	6.19451e-07	14	74251926	C14orf43	5'UTR	N_Shore	Enhancer	TRUE	No
cg18641655	4.45e-10	+++++	0.0076551	6.21025e-07	8	125025636	FER1L6;FER1L6-AS1	Body;Body		Enhancer	FALSE	Yes	Yes
cg19949550	4.51e-10	-----	-0.0113022	6.28164e-07	14	94423704	ASB2;ASB2	5'UTR;1stExon		Enhancer	TRUE	No
cg06972908	4.62e-10	-----	-0.0166802	6.42226e-07	16	30488321	ITGAL;ITGAL	Body;Body	S_Shelf	Enhancer	TRUE	No
cg20249566	4.63e-10	-----	-0.0356005	6.42359e-07	19	16830739	NWD1	TSS200		Enhancer	TRUE	No
cg03686998	4.82e-10	-----	-0.0246541	6.67416e-07	14	106330224			N_Shelf	Promoter	FALSE	Yes	Yes
cg24134897	4.94e-10	+++++	0.0340594	6.82701e-07	11	859670	TSPAN4;TSPAN4;TSPAN4;TSPAN4;TSPAN4;TSPAN4;TSPAN4	5'UTR;Body;Body;Body;Body;Body;Body	S_Shore		TRUE	No
cg23683079	5.04e-10	-----	-0.0365877	6.93821e-07	10	44353285					FALSE	Yes	Yes
cg12619810	5.04e-10	-----	-0.014585	6.93821e-07	3	39192455	CSRNP1	5'UTR	N_Shore	Enhancer	FALSE	Yes	Yes
cg22829098	5.22e-10	+++++	0.00718442	7.17211e-07	17	28053973	SSH2;SSH2;SSH2;SSH2	Body;Body;Body;Body		Enhancer	FALSE	Yes	Yes
cg20178893	5.25e-10	-----	-0.0207017	7.1994e-07	1	164558298	PBX1;PBX1;PBX1	Body;Body;Body			FALSE	Yes	Yes
cg05726935	5.34e-10	-----	-0.0156134	7.30871e-07	14	105263522	AKT1;AKT1	TSS1500;TSS1500	S_Shore	Enhancer	TRUE	No
cg03786093	5.55e-10	-----	-0.0231106	7.58152e-07	17	75371205	SEPT9;SEPT9;SEPT9;SEPT9;SEPT9;SEPT9	TSS1500;Body;Body;Body;5'UTR;Body	S_Shore	Promoter	FALSE	Yes	Yes
cg08353847	5.63e-10	+++++	0.0232626	7.67605e-07	10	6968167				Enhancer	FALSE	Yes	Yes
cg00976097	5.74e-10	+++++	0.0268537	7.81103e-07	5	421733	AHRR	Body	Island		TRUE	No
cg04664595	5.87e-10	-----	-0.0207918	7.97266e-07	14	95147289					FALSE	Yes	Yes
cg03910896	5.94e-10	-----	-0.0343298	8.05234e-07	16	27254143	NSMCE1	Body		Enhancer	FALSE	Yes	Nominally
cg10206969	6.03e-10	-----	-0.0102617	8.15877e-07	7	5518392	FBXL18	3'UTR	N_Shelf	Enhancer	TRUE	Yes	Nominally
cg25429619	6.12e-10	+++++	0.0215518	8.2626e-07	1	174846521	RABGAP1L;RABGAP1L;RABGAP1L;RABGAP1L;RABGAP1L;RABGAP1L	5'UTR;5'UTR;ExonBnd;ExonBnd;Body;Body			FALSE	Yes	Nominally
cg21863544	6.13e-10	-----	-0.0331812	8.2626e-07	6	12528631					FALSE	Yes	Yes
cg13681954	6.19e-10	-----	-0.0407122	8.32767e-07	2	122656302					FALSE	Yes	Yes
cg18268027	6.41e-10	-----	-0.0104688	8.60451e-07	3	4818913	ITPR1;ITPR1;ITPR1	Body;Body;Body		Enhancer	FALSE	Yes	Yes
cg25809905	6.42e-10	+++++	0.0304457	8.60451e-07	17	42467728	ITGA2B	TSS1500			TRUE	No
cg10609883	6.44e-10	+++++	0.0287276	8.61506e-07	11	35835819					FALSE	Yes	No
cg01926616	6.48e-10	-----	-0.0227286	8.65227e-07	11	115796067				Enhancer	FALSE	Yes	Yes
cg15490177	6.6e-10	+++++	0.0322574	8.79597e-07	4	151540382	LRBA;LRBA	Body;Body		Promoter	FALSE	Yes	Nominally
cg06344992	6.79e-10	+++++	0.0444365	9.03224e-07	15	90345999	ANPEP	Body			FALSE	Yes	Nominally
cg22792560	6.85e-10	+++++	0.0306168	9.09502e-07	4	152446017	FAM160A1	5'UTR			FALSE	Yes	Yes
cg14526576	7.2e-10	-----	-0.0269721	9.54189e-07	7	139367822	HIPK2;HIPK2	Body;Body		Enhancer	FALSE	Yes	Yes
cg20481941	7.67e-10	-----	-0.00968616	1.01458e-06	16	80604148	LINC01227;LINC01227	Body;TSS1500		Enhancer	FALSE	Yes	Yes
cg26031947	7.79e-10	-----	-0.0300026	1.02854e-06	6	111139131	AMD1	5'UTR	S_Shelf		FALSE	Yes	Yes
cg11014740	7.86e-10	-----	-0.015081	1.03586e-06	2	129079223			N_Shore		TRUE	No
cg02042026	7.96e-10	+++++	0.018414	1.04516e-06	11	113936782	ZBTB16;ZBTB16	Body;Body			FALSE	Yes	Yes
cg07045119	7.96e-10	-----	-0.00853489	1.04516e-06	20	19194540	SLC24A3	Body	S_Shore		FALSE	Yes	Yes
cg15143202	8.06e-10	-----	-0.0263093	1.05634e-06	3	168866525	MECOM;MECOM;MECOM	TSS1500;5'UTR;Body	N_Shore		FALSE	Yes	Nominally
cg02243025	8.14e-10	-----	-0.0400174	1.06486e-06	6	10655811				Promoter	FALSE	Yes	Yes
cg15167367	8.23e-10	-----	-0.0191092	1.07465e-06	2	113933123	PSD4	5'UTR		Promoter	FALSE	Yes	Nominally
cg26014782	8.28e-10	+++++	0.0327748	1.07852e-06	3	124840721	SLC12A8;SLC12A8	Body;Body		Enhancer	FALSE	Yes	Yes
cg00271766	8.29e-10	-----	-0.0524312	1.07852e-06	22	33172767	SYN3;SYN3;SYN3	Body;Body;Body			FALSE	Yes	Yes
cg07978331	8.31e-10	-----	-0.0327608	1.07915e-06	16	75046041	ZNRF1	Body		Enhancer	FALSE	Yes	Yes
cg04770751	8.34e-10	-----	-0.0223812	1.08107e-06	19	7701662	STXBP2;STXBP2	TSS1500;TSS1500	Island	Promoter	TRUE	No
cg20842915	8.5e-10	-----	-0.013785	1.0998e-06	7	39665132	RALA	5'UTR	S_Shore	Promoter	TRUE	No
cg04560781	8.62e-10	+++++	0.0152215	1.11128e-06	2	129511579				Enhancer	FALSE	Yes	Yes
cg20322193	8.62e-10	-----	-0.0318717	1.11128e-06	7	39664614	RALA	5'UTR	S_Shore	Promoter	TRUE	No
cg19589396	8.71e-10	-----	-0.0237042	1.12085e-06	8	103937374				Enhancer	TRUE	No
cg16111704	8.83e-10	-----	-0.0332922	1.13423e-06	6	41673829	TFEB;TFEB;TFEB;TFEB;TFEB	Body;5'UTR;5'UTR;5'UTR;5'UTR		Promoter	FALSE	Yes	Yes
cg15627993	8.96e-10	+++++	0.0196703	1.14678e-06	18	13628426	LDLRAD4;LDLRAD4;LDLRAD4;LDLRAD4;LDLRAD4	Body;Body;Body;Body;Body			FALSE	Yes	Nominally
cg18882687	8.96e-10	-----	-0.0176383	1.14678e-06	1	228275828	ARF1;ARF1;ARF1;ARF1	5'UTR;5'UTR;5'UTR;5'UTR			TRUE	No
cg04259305	9.02e-10	-----	-0.0226601	1.15239e-06	19	16999093	F2RL3	TSS1500	N_Shore	Enhancer	TRUE	No
cg06049452	9.41e-10	-----	-0.020664	1.20006e-06	20	32432074	CHMP4B	Body		Enhancer	FALSE	Yes	Yes
cg11697045	9.5e-10	+++++	0.0240108	1.20936e-06	16	13416540				Enhancer	FALSE	Yes	Nominally
cg27444020	9.58e-10	+++++	0.0240288	1.21736e-06	11	78108461	GAB2	Body		Enhancer	FALSE	Yes	Yes
cg24126994	9.66e-10	----?	-0.0513153	1.22534e-06	14	90086171	FOXN3	TSS1500	S_Shore	Promoter	FALSE	Yes	Yes
cg03924136	9.85e-10	+++++	0.0288988	1.24721e-06	20	62367108	LIME1;LIME1;LIME1;LIME1;ZGPAT;ZGPAT;ZGPAT;ZGPAT;ZGPAT	TSS1500;TSS1500;1stExon;5'UTR;Body;Body;Body;Body;Body	N_Shore		FALSE	Yes	No
cg14254999	9.91e-10	-----	-0.0137181	1.25258e-06	2	231790529	GPR55	TSS1500		Enhancer	TRUE	No
cg22375046	1.02e-09	-----	-0.0388502	1.28694e-06	11	126236634	ST3GAL4;ST3GAL4	5'UTR;5'UTR			FALSE	Yes	Yes
cg13117318	1.03e-09	-----	-0.00662432	1.29725e-06	17	74242643				Enhancer	FALSE	Yes	Yes
cg23491443	1.06e-09	+++++	0.0185832	1.33268e-06	12	54230081					FALSE	Yes	Yes
cg08208903	1.09e-09	-----	-0.00595883	1.36797e-06	12	90341154				Enhancer	FALSE	Yes	Yes
cg01970407	1.11e-09	+++++	0.0120552	1.39061e-06	5	323320	AHRR	Body	S_Shore	Promoter	TRUE	No
cg21575225	1.12e-09	-----	-0.0259487	1.40067e-06	1	156073485	LMNA	5'UTR		Enhancer	FALSE	Yes	Yes
cg09287749	1.13e-09	-----	-0.0277603	1.41069e-06	X	10076637	WWC3	Body		Enhancer	FALSE	Yes	Not tested
cg20366110	1.14e-09	-----	-0.0263688	1.42068e-06	8	124720897	ANXA13;ANXA13	Body;Body			TRUE	No
cg02327909	1.15e-09	+++++	0.0131731	1.43063e-06	12	53009774	KRT73	Body			FALSE	Yes	Nominally
cg04327143	1.17e-09	+++++	0.0158561	1.45043e-06	5	135226781					FALSE	Yes	Nominally
cg17631924	1.17e-09	+++++	0.013691	1.45043e-06	17	26361207					FALSE	Yes	Yes
cg03999941	1.18e-09	---?-	-0.03077	1.46028e-06	5	957511			N_Shore	Enhancer	TRUE	No
cg23681440	1.2e-09	-----	-0.0268489	1.48245e-06	13	27498239					TRUE	No
cg07267541	1.24e-09	-----	-0.0335424	1.52391e-06	9	12784592	LURAP1L;LURAP1L-AS1	Body;Body			FALSE	Yes	Yes
cg11960913	1.24e-09	-----	-0.0206262	1.52391e-06	11	70160494	PPFIA1;PPFIA1;PPFIA1	Body;Body;Body		Enhancer	FALSE	Yes	Yes
cg26703507	1.24e-09	-----	-0.0401062	1.52391e-06	2	113404661	SLC20A1	Body	S_Shore	Promoter	TRUE	No
cg01442064	1.25e-09	-----	-0.022601	1.53355e-06	4	5713450	EVC	Body	Island	Promoter	TRUE	No
cg09965980	1.26e-09	-----	-0.018737	1.5405e-06	13	28876143	FLT1	3'UTR		Enhancer	FALSE	Yes	Yes
cg02917867	1.26e-09	-----	-0.0129136	1.5405e-06	19	1265999			Island	Promoter	TRUE	No
cg14165660	1.27e-09	+++++	0.0116728	1.5474e-06	10	112889349					TRUE	No
cg08595501	1.27e-09	-----	-0.0282723	1.5474e-06	5	75878300	IQGAP2	Body		Enhancer	TRUE	No
cg04213565	1.29e-09	+++++	0.0226106	1.56908e-06	5	35900039				Enhancer	FALSE	Yes	Yes
cg21668652	1.3e-09	+++++	0.0369717	1.57854e-06	17	55749538	MSI2	Body			FALSE	Yes	Nominally
cg18954900	1.36e-09	-----	-0.0393064	1.64857e-06	12	96604497	ELK3	5'UTR		Enhancer	TRUE	No
cg00749672	1.4e-09	-----	-0.0404697	1.69417e-06	7	26437192			N_Shore	Enhancer	TRUE	No
cg07151117	1.42e-09	-----	-0.0224533	1.71545e-06	8	29204954	DUSP4;DUSP4	Body;5'UTR	N_Shore	Promoter	TRUE	No
cg24211550	1.43e-09	-----	-0.0409161	1.7246e-06	17	38758156				Enhancer	FALSE	Yes	Yes
cg24665592	1.45e-09	----?	-0.0660155	1.74575e-06	4	41348910					FALSE	Yes	Yes
cg24379915	1.46e-09	-----	-0.0158493	1.75482e-06	8	29202958	DUSP4;DUSP4	Body;Body	N_Shelf	Promoter	TRUE	No
cg08714510	1.47e-09	-----	-0.0210713	1.76385e-06	2	106755481	UXS1;UXS1;UXS1;UXS1	TSS200;Body;Body;Body		Enhancer	FALSE	Yes	Yes
cg01432620	1.48e-09	-----	-0.00674904	1.77286e-06	13	100636183	ZIC2	Body	N_Shore		TRUE	No
cg07448120	1.51e-09	-----	-0.00779952	1.80575e-06	11	108004499	ACAT1	Body			FALSE	Yes	Yes
cg26747079	1.53e-09	+++++	0.0252459	1.82659e-06	3	193518745					FALSE	Yes	Yes
cg09109520	1.54e-09	++-++	0.0149393	1.83544e-06	16	57673258	GPR56;GPR56;GPR56;GPR56;GPR56;GPR56;GPR56;GPR56;GPR56	5'UTR;5'UTR;5'UTR;5'UTR;5'UTR;1stExon;5'UTR;5'UTR;5'UTR			TRUE	No
cg14977069	1.55e-09	+++++	0.0199228	1.84427e-06	20	62367698	LIME1	TSS1500	N_Shore	Enhancer	TRUE	No
cg22256420	1.57e-09	-----	-0.0264818	1.86494e-06	10	4060366					FALSE	Yes	Yes
cg14551458	1.58e-09	-----	-0.0519042	1.87369e-06	5	123149103					FALSE	Yes	Yes
cg26416591	1.59e-09	-----	-0.0046499	1.87927e-06	11	47790035	FNBP4	TSS1500	S_Shore	Promoter	FALSE	Yes	No
cg16009311	1.59e-09	---?-	-0.0370442	1.87927e-06	8	119086762	EXT1	Body			TRUE	No
cg09360036	1.6e-09	+++++	0.018392	1.88795e-06	11	113932557	ZBTB16;ZBTB16	5'UTR;5'UTR	S_Shore		FALSE	Yes	Yes
cg16324526	1.63e-09	+++++	0.0169954	1.92016e-06	9	134459345	RAPGEF1;RAPGEF1;RAPGEF1	Body;Body;Body			FALSE	Yes	Nominally
cg17417856	1.64e-09	-----	-0.0299221	1.92874e-06	19	50191637	PRMT1;C19orf76;PRMT1;PRMT1	3'UTR;TSS1500;3'UTR;3'UTR	N_Shore		TRUE	No
cg06433467	1.68e-09	-----	-0.0119284	1.97252e-06	5	67730071				Enhancer	TRUE	No
cg05307394	1.79e-09	-----	-0.023435	2.0982e-06	2	62611092				Enhancer	FALSE	Yes	Yes
cg15022400	1.8e-09	-----	-0.0138598	2.10645e-06	15	45028161	TRIM69;TRIM69	TSS1500;TSS1500		Enhancer	TRUE	No
cg26263915	1.87e-09	-----	-0.0307999	2.18118e-06	9	138863166					FALSE	Yes	No
cg24306398	1.87e-09	-----	-0.00772572	2.18118e-06	2	39445725	CDKL4	Body			FALSE	Yes	Yes
cg01944380	1.89e-09	-----	-0.0237752	2.19729e-06	17	75388589	SEPT9;SEPT9;SEPT9;SEPT9;SEPT9;SEPT9	Body;5'UTR;Body;Body;5'UTR;Body			FALSE	Yes	Yes
cg01895164	1.89e-09	-----	-0.019675	2.19729e-06	1	26332153					FALSE	Yes	Yes
cg16941634	1.9e-09	-----	-0.018613	2.20531e-06	6	165985235	PDE10A;PDE10A	Body;Body			FALSE	Yes	Nominally
cg17333042	1.91e-09	-----	-0.0233419	2.2133e-06	10	102822201	KAZALD1	5'UTR	Island	Enhancer	TRUE	No
cg03140410	1.98e-09	-----	-0.0284945	2.28695e-06	17	30594811	RHBDL3	Body	S_Shore	Promoter	FALSE	Yes	Yes
cg11591924	1.98e-09	-----	-0.0212509	2.28695e-06	1	25327969				Enhancer	FALSE	Yes	Nominally
cg13025388	1.99e-09	-----	-0.00549533	2.29477e-06	11	118098752	MPZL3;MPZL3;MPZL3;MPZL3	3'UTR;3'UTR;Body;Body		Enhancer	FALSE	Yes	Yes
cg13033858	2e-09	-----	-0.0277189	2.30256e-06	12	109248326	SSH1;SSH1	Body;Body	N_Shelf	Enhancer	TRUE	No
cg13307782	2.06e-09	-----	-0.00517485	2.3678e-06	5	77291146					TRUE	No
cg23205886	2.15e-09	-----	-0.0256934	2.46726e-06	5	138611766	SNHG4;MATR3	Body;5'UTR	S_Shore	Enhancer	TRUE	No
cg01094982	2.16e-09	-----	-0.0126528	2.47474e-06	22	43401279	PACSIN2	5'UTR		Enhancer	FALSE	Yes	Yes
cg18963236	2.18e-09	-----	-0.035688	2.49363e-06	2	220325833	SPEG;SPEG	5'UTR;Body			FALSE	Yes	Yes
cg05752866	2.24e-09	-----	-0.0227986	2.55814e-06	2	177423529					FALSE	Yes	Yes
cg08872577	2.32e-09	+++++	0.0423487	2.64101e-06	1	42385480	HIVEP3;HIVEP3;HIVEP3;HIVEP3	TSS1500;TSS1500;TSS1500;Body	S_Shore	Promoter	FALSE	Yes	Yes
cg22702259	2.32e-09	-----	-0.00395779	2.64101e-06	17	38490520	RARA;RARA;RARA	Body;Body;Body			FALSE	Yes	Yes
cg15482002	2.34e-09	-----	-0.0395797	2.65952e-06	3	129323930	PLXND1	Body	Island	Promoter	FALSE	Yes	No
cg07742396	2.38e-09	-----	-0.0244642	2.70066e-06	1	27853060			N_Shore	Promoter	TRUE	No
cg24807889	2.41e-09	-----	-0.020542	2.73034e-06	1	1135955			N_Shore		TRUE	No
cg18125510	2.44e-09	-----	-0.0189001	2.75992e-06	14	100841768	WARS;WDR25;WARS;WARS;WDR25;WARS;WARS;WARS	1stExon;TSS1500;5'UTR;5'UTR;TSS1500;1stExon;5'UTR;5'UTR	N_Shore	Promoter	TRUE	No
cg23883522	2.47e-09	+++++	0.0326312	2.78942e-06	21	45795579	TRPM2;TRPM2	Body;Body			FALSE	Yes	Nominally
cg17533477	2.6e-09	-----	-0.0207077	2.93157e-06	7	97501010	ASNS;ASNS;ASNS	5'UTR;5'UTR;5'UTR	N_Shore	Promoter	TRUE	No
cg01651915	2.67e-09	-----	-0.0417474	3.00572e-06	8	55795551					TRUE	No
cg21323941	2.68e-09	+++++	0.0145406	3.01221e-06	4	36282300	DTHD1	TSS1500			FALSE	Yes	Nominally
cg00260810	2.7e-09	-----	-0.0284814	3.02989e-06	3	183894469	AP2M1;AP2M1	5'UTR;5'UTR	S_Shore	Promoter	FALSE	Yes	Yes
cg02186444	2.71e-09	+++++	0.0202751	3.03632e-06	17	73120977	ARMC7	Body	N_Shelf		TRUE	No
cg00238470	2.85e-09	-----	-0.0182436	3.18814e-06	1	36616845	TRAPPC3	5'UTR	S_Shore	Enhancer	FALSE	Yes	Yes
cg26282236	2.92e-09	++-++	0.0296616	3.26131e-06	12	1025755	RAD52	Body			TRUE	No
cg16398761	2.95e-09	---?-	-0.0208294	3.28965e-06	14	74220238	C14orf43;C14orf43	5'UTR;5'UTR		Enhancer	TRUE	No
cg07166409	2.98e-09	-----	-0.00430597	3.31789e-06	2	97534057	SEMA4C	5'UTR	N_Shore	Promoter	TRUE	No
cg25991374	3.02e-09	+++++	0.0138729	3.35717e-06	1	178476197					FALSE	Yes	Nominally
cg08434071	3.03e-09	-----	-0.00682186	3.35777e-06	1	15485867	TMEM51;TMEM51;TMEM51;TMEM51	5'UTR;5'UTR;5'UTR;5'UTR		Enhancer	FALSE	Yes	Yes
cg24497361	3.03e-09	-----	-0.0231165	3.35777e-06	11	3858493	RHOG	5'UTR	N_Shelf	Enhancer	TRUE	No
cg14455466	3.08e-09	+++++	0.011476	3.40257e-06	5	134895387					FALSE	Yes	Nominally
cg00125205	3.08e-09	++-++	0.0216429	3.40257e-06	4	36282463	DTHD1	TSS1500			FALSE	Yes	No
cg17050747	3.13e-09	-----	-0.0095275	3.44708e-06	5	89427766				Enhancer	FALSE	Yes	Nominally
cg05767404	3.13e-09	-----	-0.0587202	3.44708e-06	1	247712591	C1orf150	Body			TRUE	No
cg08726900	3.15e-09	+++++	0.0196382	3.46374e-06	16	89550474	ANKRD11	5'UTR		Enhancer	TRUE	No
cg13594903	3.19e-09	---?-	-0.0208589	3.5023e-06	9	35102784	STOML2	Body	Island	Promoter	TRUE	No
cg18956562	3.2e-09	+++++	0.0101685	3.50786e-06	7	144149304	TPK1;TPK1	3'UTR;3'UTR		Enhancer	TRUE	No
cg26707709	3.21e-09	+++++	0.0237802	3.5134e-06	2	241975756	SNED1	Body	Island	Promoter	TRUE	No
cg26589669	3.3e-09	-----	-0.034499	3.60635e-06	10	106028206	GSTO2	TSS1500	N_Shore	Promoter	TRUE	No
cg15160624	3.45e-09	-----	-0.0565564	3.76448e-06	3	21793157	ZNF385D	TSS1500			FALSE	Yes	Yes
cg24688401	3.47e-09	-----	-0.0180399	3.7805e-06	16	56311522	GNAO1;GNAO1	Body;Body			FALSE	Yes	Yes
cg17739573	3.51e-09	-----	-0.0285435	3.81822e-06	4	74905354	CXCL3	TSS1500	S_Shore		FALSE	Yes	Yes
cg12464134	3.52e-09	-----	-0.0198936	3.82324e-06	7	5578193				Enhancer	FALSE	Yes	Yes
cg02734358	3.54e-09	-----	-0.0315577	3.83909e-06	4	90227074	GPRIN3	5'UTR	N_Shore		TRUE	No
cg26342454	3.66e-09	-----	-0.0479601	3.96318e-06	4	10035262	SLC2A9	5'UTR		Enhancer	FALSE	Yes	Yes
cg24227782	3.68e-09	-----	-0.0149571	3.97877e-06	6	111885923	TRAF3IP2-AS1;TRAF3IP2-AS1;TRAF3IP2-AS1;TRAF3IP2;TRAF3IP2;TRAF3IP2;TRAF3IP2	Body;Body;Body;Body;Body;Body;Body			FALSE	Yes	Yes
cg00324097	3.76e-09	-----	-0.0184487	4.05909e-06	17	75446549	SEPT9;SEPT9;SEPT9;SEPT9;SEPT9;SEPT9	TSS200;Body;Body;Body;Body;Body	N_Shore	Enhancer	TRUE	No
cg11830461	3.82e-09	-----	-0.0118125	4.11761e-06	20	49039858					FALSE	Yes	Nominally
cg08673945	3.84e-09	-----	-0.0220177	4.13289e-06	9	20490677	MLLT3;MLLT3	Body;Body		Enhancer	FALSE	Yes	Yes
cg22417733	3.9e-09	-----	-0.0164752	4.19112e-06	6	153303409	FBXO5;FBXO5	5'UTR;Body	Island	Promoter	TRUE	No
cg16134718	3.92e-09	-----	-0.0107878	4.20625e-06	2	204973770				Enhancer	TRUE	No
cg14549158	3.95e-09	-----	-0.0268864	4.23205e-06	6	162521035	PARK2;PARK2;PARK2	Body;Body;Body			FALSE	Yes	Yes
cg04716530	4.05e-09	---?-	-0.0195844	4.33265e-06	16	30485684	ITGAL;ITGAL	Body;Body	Island	Enhancer	TRUE	No
cg16290996	4.07e-09	-----	-0.0278832	4.3475e-06	1	173835989	GAS5;SNORD78;SNORD76;SNORD77;SNORD44;SNORD79	Body;TSS1500;TSS200;TSS1500;TSS1500;TSS1500	N_Shore	Promoter	TRUE	No
cg15074047	4.1e-09	+++++	0.0134867	4.37297e-06	2	192701514	SDPR	Body			TRUE	No
cg01213463	4.11e-09	-----	-0.0272205	4.37706e-06	19	32842514	ZNF507;ZNF507	5'UTR;5'UTR		Enhancer	FALSE	Yes	Yes
cg08101174	4.12e-09	-----	-0.0272694	4.38115e-06	10	104196541				Promoter	TRUE	No
cg11649376	4.14e-09	-----	-0.0219613	4.39583e-06	12	81473234	ACSS3	Body	S_Shore		TRUE	No
cg07489404	4.18e-09	+++++	0.00398618	4.42508e-06	5	94120935	MCTP1;MCTP1;MCTP1	Body;Body;Body			FALSE	Yes	No
cg00177243	4.18e-09	+++++	0.031702	4.42508e-06	10	18434068	CACNB2;CACNB2;CACNB2;CACNB2;CACNB2;CACNB2	Body;Body;Body;Body;Body;Body	S_Shelf		TRUE	No
cg11148327	4.21e-09	-----	-0.0171459	4.44359e-06	6	11390130					FALSE	Yes	Yes
cg16720061	4.21e-09	-----	-0.00703294	4.44359e-06	7	154990228				Enhancer	FALSE	Yes	Yes
cg22441770	4.34e-09	-----	-0.0181973	4.57401e-06	1	153929592	CRTC2	Body	N_Shore	Promoter	TRUE	No
cg06299644	4.44e-09	-----	-0.0134155	4.67247e-06	2	54686203	SPTBN1	5'UTR	S_Shore		FALSE	Yes	Yes
cg08052292	4.52e-09	+++++	0.013822	4.74962e-06	3	56789178	ARHGEF3;ARHGEF3;ARHGEF3	Body;Body;Body		Enhancer	TRUE	No
cg04243090	4.54e-09	-----	-0.0274431	4.76359e-06	1	208834795					FALSE	Yes	Nominally
cg05466844	4.76e-09	---?-	-0.0200187	4.97971e-06	15	91415964	FURIN;FURIN;FURIN	5'UTR;5'UTR;TSS200	S_Shore	Promoter	FALSE	Yes	Yes
cg22533683	4.76e-09	-----	-0.0310609	4.97971e-06	17	29887049	MIR193A	Body	Island		TRUE	No
cg05207730	5.02e-09	+++++	0.0271311	5.24399e-06	11	116797991	SIK3;SIK3;SIK3	Body;Body;Body		Enhancer	FALSE	Yes	Yes
cg27022614	5.05e-09	-----	-0.0291093	5.26758e-06	X	22341884	PTCHD1-AS	Body			FALSE	Yes	#N/A
cg02968508	5.07e-09	-----	-0.0190972	5.28069e-06	3	9956698	IL17RE;IL17RE;IL17RE	Body;Body;Body	N_Shore	Enhancer	TRUE	No
cg24667400	5.11e-09	+++++	0.0238115	5.31456e-06	6	122816886	PKIB;PKIB;PKIB	5'UTR;5'UTR;5'UTR			FALSE	Yes	Nominally
cg25466245	5.13e-09	-----	-0.00561997	5.32756e-06	1	223407095	SUSD4	Body			TRUE	No
cg09499939	5.15e-09	-----	-0.0198325	5.34052e-06	19	16973595	SIN3B;SIN3B;SIN3B	Body;Body;TSS1500		Enhancer	FALSE	Yes	Nominally
cg18561976	5.35e-09	-----	-0.0625462	5.53983e-06	2	204801508	ICOS;ICOS	5'UTR;1stExon			TRUE	No
cg03440944	5.49e-09	-----	-0.0158687	5.67652e-06	7	45023329	C7orf40	Body	N_Shelf	Enhancer	TRUE	No
cg05940455	5.52e-09	-----	-0.0322243	5.69925e-06	2	233265137					FALSE	Yes	Yes
cg10413305	5.61e-09	-----	-0.0183952	5.78376e-06	11	122540748	UBASH3B	Body			FALSE	Yes	Yes
cg08792700	5.66e-09	-----	-0.0215159	5.82686e-06	9	86911279	SLC28A3;SLC28A3;SLC28A3	Body;Body;Body		Enhancer	FALSE	Yes	Yes
cg14074174	5.72e-09	-----	-0.0107481	5.8801e-06	19	7986206	SNAPC2;SNAPC2	Body;Body	S_Shore	Enhancer	TRUE	No
cg21702517	5.75e-09	-----	-0.0109909	5.9024e-06	18	30133400					FALSE	Yes	Yes
cg10217853	5.8e-09	-----	-0.0200257	5.94513e-06	15	98505199	ARRDC4	Body	S_Shore		FALSE	Yes	Yes
cg00911794	5.95e-09	+++++	0.0188489	6.0901e-06	17	1962132	HIC1;HIC1	3'UTR;3'UTR	Island	Promoter	TRUE	No
cg05198378	6.03e-09	-----	-0.0410987	6.1631e-06	5	82104885					FALSE	Yes	Yes
cg16176702	6.11e-09	+++++	0.0238538	6.22695e-06	15	66307282	MEGF11	Body			FALSE	Yes	Yes
cg19784428	6.11e-09	-----	-0.0367956	6.22695e-06	19	16830746	NWD1	TSS200		Enhancer	TRUE	No
cg17318719	6.24e-09	-----	-0.0192153	6.35033e-06	11	117959349	TMPRSS4;TMPRSS4	Body;Body			TRUE	No
cg00024404	6.35e-09	-----	-0.003105	6.45303e-06	5	79552470	SERINC5	TSS1500	S_Shore	Promoter	TRUE	No
cg09609957	6.37e-09	-----	-0.0196123	6.4641e-06	14	91711676	GPR68;GPR68	TSS1500;5'UTR		Enhancer	FALSE	Yes	Yes
cg20433154	6.38e-09	+++++	0.0146758	6.46502e-06	5	325118	AHRR;AHRR	Body;Body	S_Shelf	Enhancer	FALSE	Yes	Nominally
cg18844158	6.42e-09	-----	-0.0125818	6.49628e-06	1	156096574	LMNA;LMNA;LMNA;LMNA;LMNA;LMNA;LMNA	5'UTR;Body;Body;Body;Body;Body;Body		Enhancer	FALSE	Yes	Yes
cg19373778	6.47e-09	-----	-0.047798	6.53756e-06	1	9354516	SPSB1	5'UTR		Enhancer	FALSE	Yes	Yes
cg10143064	6.49e-09	+++++	0.0194872	6.54846e-06	17	72804065	TMEM104	Body			FALSE	Yes	Nominally
cg26882556	6.58e-09	-----	-0.0219325	6.62985e-06	8	29360758				Enhancer	FALSE	Yes	Yes
cg05824218	6.65e-09	+++++	9.91603e-05	6.69089e-06	17	38499096	RARA;RARA;RARA;RARA	1stExon;Body;Body;Body	S_Shore		TRUE	No
cg02497737	6.71e-09	+++++	0.020377	6.74171e-06	15	84595079	ADAMTSL3;ADAMTSL3	Body;Body			FALSE	Yes	Nominally
cg09098393	6.78e-09	-----	-0.0448428	6.80242e-06	8	55423202					FALSE	Yes	Yes
cg08331398	6.82e-09	-----	-0.0125739	6.8329e-06	6	32808918	PSMB8;PSMB8	Body;Body	N_Shelf	Enhancer	TRUE	No
cg16712581	6.86e-09	+++++	0.00541743	6.85364e-06	4	89526335	HERC3;HERC3	5'UTR;5'UTR		Enhancer	FALSE	Yes	Nominally
cg09796170	6.86e-09	-----	-0.0321935	6.85364e-06	1	156548174	TTC24	TSS1500			TRUE	No
cg07714426	6.89e-09	+++++	0.0184434	6.87395e-06	9	14108179	NFIB;NFIB;NFIB;NFIB	Body;Body;Body;Body			FALSE	Yes	No
cg14462402	6.98e-09	-----	-0.0393371	6.95397e-06	11	120678447	GRIK4	Body			TRUE	No
cg16895116	7.09e-09	-----	-0.0363374	7.0438e-06	1	20479470					FALSE	Yes	Nominally
cg17389813	7.09e-09	-----	-0.0256758	7.0438e-06	11	122060265	LOC399959	Body			TRUE	No
cg03052614	7.13e-09	+++++	0.0157154	7.07365e-06	17	17410416	PEMT;PEMT;PEMT;PEMT;PEMT	Body;Body;Body;Body;Body			FALSE	Yes	Nominally
cg12441500	7.29e-09	-----	-0.0226425	7.21224e-06	16	12207676	SNX29	Body	N_Shelf		FALSE	Yes	Yes
cg09701700	7.29e-09	-----	-0.0281149	7.21224e-06	10	104194843	MIR146B	TSS1500	S_Shelf	Enhancer	TRUE	No
cg10190813	7.35e-09	-----	-0.00995777	7.26104e-06	7	48018530	HUS1	Body	N_Shore	Promoter	TRUE	No
cg12466556	7.36e-09	+++++	0.0268757	7.26104e-06	22	30443509	HORMAD2-AS1	Body			FALSE	Yes	Yes
cg13784607	7.37e-09	-----	-0.0253742	7.26104e-06	11	47546214	CELF1;CELF1	5'UTR;TSS1500		Enhancer	FALSE	Yes	Yes
cg23667432	7.42e-09	-----	-0.0167865	7.30018e-06	2	233244439	ALPP	Body	Island		TRUE	No
cg13433259	7.45e-09	-----	-0.0332275	7.31956e-06	6	11237041	NEDD9;NEDD9	Body;Body		Enhancer	FALSE	Yes	Yes
cg24502904	7.5e-09	-----	-0.0301381	7.3585e-06	12	53399544	EIF4B	TSS1500	N_Shore	Promoter	TRUE	No
cg06321596	7.56e-09	-----	-0.0352127	7.40714e-06	16	17562960	XYLT1	Body		Promoter	TRUE	No
cg15415882	7.74e-09	-----	-0.0241352	7.56264e-06	3	194925340	XXYLT1;XXYLT1	Body;Body		Enhancer	FALSE	Yes	Yes
cg21392700	7.74e-09	-----	-0.0156866	7.56264e-06	13	36049335	MAB21L1;MIR548F5;NBEA	1stExon;Body;Body	N_Shore		TRUE	No
cg03461577	7.79e-09	-----	-0.0266646	7.60104e-06	11	33901166	LMO2	5'UTR			FALSE	Yes	Yes
cg00210249	7.81e-09	++-++	0.0120944	7.6101e-06	10	71135679	HK1;HK1;HK1;HK1;HK1	Body;Body;Body;Body;Body			TRUE	No
cg04685387	7.84e-09	-----	-0.0375617	7.62887e-06	10	34925640	PARD3	Body			TRUE	No
cg02095838	7.97e-09	----?	-0.0177482	7.74476e-06	7	110651934	IMMP2L;IMMP2L	Body;Body		Enhancer	FALSE	Yes	Nominally
cg14471778	8.02e-09	+++++	0.0345818	7.7827e-06	12	11113068	PRH1-PRR4;PRH1;PRH1	Body;Body;5'UTR		Enhancer	FALSE	Yes	Nominally
cg23954423	8.11e-09	-----	-0.0225048	7.8593e-06	6	46291216	RCAN2;RCAN2;RCAN2;LOC101926915	Body;Body;Body;Body			FALSE	Yes	Yes
cg21380990	8.32e-09	-----	-0.0287004	8.05182e-06	22	43403980	PACSIN2	5'UTR			FALSE	Yes	Nominally
cg05265359	8.34e-09	-----	-0.0274861	8.0602e-06	11	45943572	GYLTL1B	5'UTR	Island		TRUE	No
cg09303399	8.36e-09	-----	-0.0326389	8.06593e-06	14	106330947			N_Shelf	Promoter	FALSE	Yes	Yes
cg04369835	8.38e-09	+++?+	0.0491686	8.06593e-06	5	322705	AHRR;AHRR	Body;Body	Island	Promoter	FALSE	Yes	Yes
cg05570258	8.38e-09	+++++	0.00227058	8.06593e-06	7	105662884	FLJ23834	Body		Enhancer	TRUE	No
cg07324245	8.49e-09	-----	-0.014165	8.16075e-06	17	75445905	SEPT9;SEPT9;SEPT9;SEPT9;SEPT9;SEPT9	Body;Body;Body;Body;TSS1500;Body	N_Shore	Enhancer	TRUE	No
cg10068045	8.64e-09	-----	-0.0435417	8.29371e-06	19	2291785	LINGO3	5'UTR	Island		FALSE	Yes	Yes
cg21804649	8.72e-09	----?	-0.0565655	8.35921e-06	1	171847010	DNM3;DNM3;DNM3	Body;Body;Body			FALSE	Yes	#N/A
cg25838968	8.74e-09	-----	-0.031124	8.36709e-06	1	208250847	PLXNA2	Body			TRUE	No
cg16565224	8.82e-09	-----	-0.027993	8.43231e-06	6	11411456				Enhancer	FALSE	Yes	Yes
cg25984701	9.21e-09	+++-+	0.00265818	8.79333e-06	13	52006860	INTS6;INTS6;INTS6	Body;Body;5'UTR			FALSE	Yes	Nominally
cg27049094	9.35e-09	+++++	0.0420047	8.91502e-06	2	75067716	HK2	Body			TRUE	No
cg01435315	9.37e-09	-----	-0.0511797	8.92211e-06	10	72348420				Enhancer	FALSE	Yes	Yes
cg19321684	9.54e-09	-----	-0.0389679	9.07182e-06	6	32159933	GPSM3	Body	N_Shelf	Promoter	TRUE	No
cg25037104	9.61e-09	+++++	0.00998403	9.12617e-06	3	188510700	LPP;LPP;LPP	Body;Body;Body			FALSE	Yes	Yes
cg00116430	9.66e-09	-----	-0.0267658	9.16141e-06	1	94188268					TRUE	No
cg22635676	9.81e-09	+++++	0.058994	9.27889e-06	2	241975971	SNED1	Body	Island	Promoter	TRUE	No
cg16401465	9.81e-09	-----	-0.0225681	9.27889e-06	10	63809170	ARID5B	Body		Promoter	TRUE	No
cg12490835	9.85e-09	-----	-0.0291051	9.30433e-06	10	22623821			Island		TRUE	No
cg11621113	9.88e-09	-----	-0.0241466	9.32028e-06	19	12776725	MORG1;MORG1;MAN2B1	TSS1500;TSS1500;Body	N_Shore	Promoter	TRUE	No
cg21915904	1e-08	-----	-0.0340147	9.42097e-06	17	2829770	RAP1GAP2;RAP1GAP2	Body;Body			FALSE	Yes	Yes
cg02716826	1.02e-08	-----	-0.0229386	9.59666e-06	9	33447032	SUGT1P1;AQP3	Body;Body	N_Shore	Enhancer	TRUE	No
cg05465666	1.03e-08	-----	-0.0315269	9.66514e-06	1	150244765	C1orf54;C1orf54;C1orf54;C1orf54;C1orf54;C1orf54;C1orf54	TSS1500;TSS1500;TSS1500;1stExon;1stExon;5'UTR;5'UTR	S_Shelf	Enhancer	FALSE	Yes	Yes
cg16219322	1.03e-08	-----	-0.0124286	9.66514e-06	5	399012	AHRR	Body		Enhancer	TRUE	No
cg00232091	1.05e-08	----?	-0.0123225	9.82685e-06	20	43182352	PKIG;PKIG;PKIG;PKIG	5'UTR;5'UTR;5'UTR;5'UTR			FALSE	Yes	Nominally
cg02141604	1.05e-08	-----	-0.0224039	9.82685e-06	3	52058921				Enhancer	FALSE	Yes	Yes
cg06517956	1.06e-08	+++++	0.0124855	9.89437e-06	7	105383652	ATXN7L1	Body		Enhancer	FALSE	Yes	Nominally
cg05704547	1.06e-08	+++++	-0.000271431	9.89437e-06	3	60067722	FHIT;FHIT	Body;Body		Enhancer	FALSE	Yes	Yes
cg08565469	1.07e-08	-----	-0.0458177	9.93549e-06	19	2291389	LINGO3	Body	Island	Promoter	FALSE	Yes	Yes
cg03757296	1.07e-08	-----	-0.00969111	9.93549e-06	6	47121238					FALSE	Yes	Yes
cg06062640	1.07e-08	-----	-0.0362239	9.93549e-06	20	52272952			N_Shelf	Enhancer	FALSE	Yes	Yes
cg26942477	1.07e-08	-----	-0.025544	9.93549e-06	2	173984917	ZAK;ZAK	Body;Body		Enhancer	FALSE	Yes	Yes
cg15133043	1.08e-08	+++++	0.00958475	1.00153e-05	17	29405668					FALSE	Yes	Yes
cg15653143	1.09e-08	-----	-0.0184369	1.00948e-05	11	60822690				Enhancer	FALSE	Yes	Yes
cg05663968	1.12e-08	+++++	0.0272673	1.03457e-05	16	292215	ITFG3;ITFG3;ITFG3	5'UTR;5'UTR;Body		Enhancer	FALSE	Yes	Nominally
cg00717494	1.12e-08	-----	-0.0177293	1.03457e-05	2	129202877					FALSE	Yes	Yes
cg06119833	1.17e-08	-----	-0.0334977	1.07935e-05	14	101692579					FALSE	Yes	Nominally
cg23535194	1.2e-08	-----	-0.0303851	1.10273e-05	8	29266207				Enhancer	FALSE	Yes	Yes
cg09560590	1.2e-08	+++++	0.0104793	1.10273e-05	5	143191663	HMHB1	TSS200		Enhancer	TRUE	No
cg26889659	1.2e-08	-----	-0.0696044	1.10273e-05	6	684090	EXOC2	5'UTR		Enhancer	TRUE	No
cg10582712	1.21e-08	-----	-0.0321464	1.11048e-05	1	17767282	RCC2	TSS1500	S_Shore	Enhancer	FALSE	Yes	Yes
cg05487507	1.23e-08	-----	-0.0294109	1.12738e-05	17	46671861	LOC404266;LOC404266;LOC404266;HOXB5;LOC404266;LOC404266	Body;Body;Body;TSS1500;TSS1500;Body	N_Shore		TRUE	No
cg04002038	1.25e-08	+?+++	0.0249487	1.14276e-05	4	56097	ZNF718;ZNF595;ZNF595;ZNF595;ZNF595;ZNF718;ZNF718	TSS1500;5'UTR;5'UTR;Body;Body;Body;Body	S_Shelf		FALSE	Yes	Nominally
cg22486366	1.25e-08	-----	-0.030695	1.14276e-05	1	20479732					FALSE	Yes	Nominally
cg06121808	1.27e-08	-----	-0.0243489	1.15955e-05	2	113404678	SLC20A1	Body	S_Shore	Promoter	TRUE	No
cg08331284	1.28e-08	-----	-0.0225911	1.16569e-05	10	80841582	ZMIZ1	5'UTR			FALSE	Yes	Nominally
cg22353329	1.28e-08	+++++	0.00507934	1.16569e-05	17	77814357	CBX4	TSS1500	Island	Promoter	TRUE	No
cg25421530	1.29e-08	+++++	0.00730872	1.17329e-05	10	97200987	SORBS1;SORBS1;SORBS1;SORBS1;SORBS1;SORBS1;SORBS1	5'UTR;TSS200;TSS200;TSS200;5'UTR;TSS200;TSS200		Enhancer	TRUE	No
cg15434733	1.3e-08	-----	-0.0122598	1.17937e-05	22	31683813	PIK3IP1;PIK3IP1	Body;Body	N_Shelf	Enhancer	FALSE	Yes	Yes
cg22140618	1.3e-08	-----	-0.0188908	1.17937e-05	7	139742416	PARP12;PARP12	Body;Body			FALSE	Yes	Nominally
cg10816539	1.31e-08	-----	-0.0280395	1.18692e-05	3	56834848	ARHGEF3;ARHGEF3;ARHGEF3	Body;Body;Body	N_Shore	Promoter	FALSE	Yes	No
cg06671242	1.32e-08	++-++	0.00202168	1.18991e-05	11	86527767	PRSS23;PRSS23;PRSS23	Body;Body;Body			FALSE	Yes	Yes
cg09251068	1.32e-08	-----	-0.0506152	1.18991e-05	7	117421001	CTTNBP2	Body		Enhancer	FALSE	Yes	Yes
cg11683390	1.32e-08	-----	-0.0298506	1.18991e-05	1	25361490				Enhancer	FALSE	Yes	Yes
cg08025679	1.32e-08	-----	-0.0325604	1.18991e-05	19	30157311	PLEKHF1	5'UTR	S_Shore	Promoter	FALSE	Yes	Yes
cg23913963	1.33e-08	-----	-0.0183703	1.19741e-05	1	17766917	RCC2	TSS1500	S_Shore	Promoter	TRUE	No
cg09511513	1.35e-08	-----	-0.0385037	1.21387e-05	8	20060014	ATP6V1B2	Body		Enhancer	FALSE	Yes	Nominally
cg01821920	1.36e-08	-----	-0.00740235	1.22132e-05	1	6015903	NPHP4;NPHP4;NPHP4;NPHP4	Body;Body;5'UTR;5'UTR			FALSE	Yes	Yes
cg00007076	1.37e-08	-----	-0.0366386	1.22875e-05	8	67342600	RRS1;RRS1	1stExon;3'UTR	N_Shore	Promoter	TRUE	No
cg03509898	1.39e-08	+++++	0.00649556	1.24511e-05	14	104190750	ZFYVE21	Body	N_Shelf		TRUE	No
cg08343624	1.4e-08	-----	-0.0302744	1.25249e-05	17	79364211			N_Shelf		FALSE	Yes	Yes
cg17381396	1.41e-08	+++++	0.0217353	1.25827e-05	1	10527895	DFFA;DFFA	Body;Body			FALSE	Yes	Nominally
cg21619827	1.41e-08	+++++	0.031266	1.25827e-05	8	77528430	ZFHX4-AS1	Body			FALSE	Yes	Nominally
cg11225759	1.45e-08	-----	-0.0320854	1.29234e-05	15	92614493	SLCO3A1;SLCO3A1	Body;Body		Enhancer	FALSE	Yes	Yes
cg12103569	1.48e-08	+++++	0.0192816	1.31742e-05	12	132258560	SFRS8	Body		Enhancer	TRUE	No
cg15261712	1.55e-08	+++++	0.013332	1.37801e-05	7	92238248	CDK6;CDK6	3'UTR;3'UTR			TRUE	No
cg25331593	1.57e-08	-----	-0.0296735	1.39404e-05	9	140197800	NRARP	TSS1500	S_Shore		FALSE	Yes	Yes
cg16585234	1.58e-08	-----	-0.0239927	1.40117e-05	1	25944802	MAN1C1	1stExon	S_Shore	Promoter	TRUE	No
cg05816188	1.59e-08	-----	-0.0451893	1.40828e-05	4	100274232	ADH1C	TSS200			FALSE	Yes	Yes
cg08282118	1.6e-08	-----	-0.00887523	1.41537e-05	17	38480483	RARA;RARA;RARA	5'UTR;5'UTR;5'UTR		Enhancer	FALSE	Yes	Yes
cg03295554	1.61e-08	-----	-0.0440933	1.42245e-05	11	128395450	ETS1	Body	S_Shelf	Enhancer	TRUE	No
cg05720640	1.62e-08	-----	-0.0355894	1.42951e-05	10	18689948	CACNB2;CACNB2;CACNB2;CACNB2;CACNB2;CACNB2;CACNB2;CACNB2;CACNB2;CACNB2	5'UTR;1stExon;Body;Body;Body;Body;Body;Body;Body;Body			FALSE	Yes	Nominally
cg18581607	1.63e-08	+++++	0.0323698	1.43477e-05	17	4714084	PLD2;PLD2;PLD2;PLD2	ExonBnd;ExonBnd;Body;Body	S_Shelf		FALSE	Yes	Nominally
cg25661658	1.63e-08	-----	-0.0178564	1.43477e-05	20	31560889				Enhancer	FALSE	Yes	Yes
cg03764753	1.65e-08	-----	-0.0388293	1.45057e-05	2	152163155					FALSE	Yes	Yes
cg09570614	1.7e-08	+++++	0.0094565	1.49268e-05	2	112124380					TRUE	No
cg17024919	1.71e-08	-----	-0.0356131	1.49961e-05	3	21792248	ZNF385D	Body			TRUE	No
cg03358636	1.72e-08	-----	-0.0315632	1.50652e-05	3	197474006	KIAA0226	5'UTR	N_Shelf	Enhancer	TRUE	No
cg25964299	1.74e-08	+++++	0.00524304	1.52216e-05	1	15508314	TMEM51;TMEM51;TMEM51;TMEM51	5'UTR;5'UTR;5'UTR;5'UTR		Enhancer	FALSE	Yes	Nominally
cg14789659	1.76e-08	-----	-0.0140602	1.53776e-05	10	63809073	ARID5B	Body		Promoter	TRUE	No
cg06341867	1.77e-08	-----	-0.0265083	1.5446e-05	1	180208880	LHX4	Body	S_Shelf		FALSE	Yes	Nominally
cg18522582	1.79e-08	-----	-0.0382165	1.55632e-05	2	223915743	KCNE4	TSS1500	N_Shore		FALSE	Yes	Yes
cg01388711	1.79e-08	-----	-0.0306478	1.55632e-05	9	130769758				Enhancer	FALSE	Yes	Yes
cg26669717	1.79e-08	-----	-0.0172713	1.55632e-05	7	641028	PRKAR1B;PRKAR1B;PRKAR1B;PRKAR1B;PRKAR1B;PRKAR1B	Body;Body;Body;Body;Body;Body	N_Shelf	Enhancer	TRUE	No
cg19696491	1.83e-08	+++++	0.028591	1.58915e-05	15	78857124	CHRNA5	TSS1500	N_Shore	Promoter	TRUE	No
cg12560431	1.85e-08	-----	-0.0159804	1.60456e-05	3	12219504	SYN2;SYN2	Body;Body			FALSE	Yes	Nominally
cg03254067	1.86e-08	+++++	-0.00306241	1.61126e-05	4	10591571	CLNK	Body			TRUE	No
cg26992381	1.87e-08	-----	-0.0276343	1.61795e-05	3	71478152	FOXP1;FOXP1;FOXP1;FOXP1;FOXP1	5'UTR;5'UTR;5'UTR;5'UTR;5'UTR			FALSE	Yes	Yes
cg10719303	1.89e-08	+++++	0.016861	1.63327e-05	21	46513297	ADARB1;ADARB1;ADARB1;ADARB1;ADARB1;ADARB1;ADARB1;ADARB1	5'UTR;5'UTR;5'UTR;5'UTR;Body;Body;Body;Body			FALSE	Yes	Nominally
cg02078001	1.95e-08	-----	0.000568941	1.68103e-05	2	106755680	UXS1;UXS1;UXS1;UXS1	TSS1500;Body;Body;Body		Enhancer	FALSE	Yes	Yes
cg15903032	1.95e-08	-----	-0.0257214	1.68103e-05	10	101297605			Island		TRUE	No
cg09578155	1.98e-08	-----	-0.0166919	1.70482e-05	11	68141470	LRP5	Body		Enhancer	TRUE	No
cg09550697	2e-08	-----	-0.00294937	1.71995e-05	8	145012068	PLEC1;PLEC1;PLEC1;PLEC1;PLEC1;PLEC1;PLEC1;PLEC1	Body;Body;Body;Body;Body;Body;Body;Body	S_Shelf		TRUE	No
cg04061293	2.04e-08	----?	-0.0237642	1.75223e-05	12	90341279				Enhancer	FALSE	Yes	Nominally
cg06047127	2.05e-08	+++++	0.0186829	1.75869e-05	7	110163024					FALSE	Yes	Nominally
cg21404557	2.09e-08	+++++	0.0208012	1.79085e-05	12	94493711			N_Shelf		FALSE	Yes	Nominally
cg10189850	2.1e-08	+++++	0.0341637	1.79509e-05	5	6366345					FALSE	Yes	Nominally
cg07330742	2.1e-08	-----	-0.0184773	1.79509e-05	10	80889044	ZMIZ1	5'UTR			FALSE	Yes	Yes
cg07893565	2.13e-08	+++++	0.0233527	1.81854e-05	4	84218838	HPSE;HPSE;HPSE;HPSE	Body;Body;Body;Body		Enhancer	FALSE	Yes	Nominally
cg05218021	2.17e-08	+++++	0.0076732	1.85047e-05	1	38580101					FALSE	Yes	Nominally
cg11054403	2.18e-08	+++++	0.0043648	1.85677e-05	14	70658611			S_Shelf		TRUE	No
cg06555319	2.2e-08	+++++	0.0118388	1.87156e-05	5	1408879	SLC6A3	Body			FALSE	Yes	Yes
cg14439572	2.23e-08	-----	-0.00313636	1.89481e-05	8	102121398				Enhancer	TRUE	No
cg11334300	2.24e-08	+++++	0.0110492	1.89876e-05	13	114152914	TMCO3	Body			FALSE	Yes	Nominally
cg12214451	2.24e-08	-----	-0.0289456	1.89876e-05	4	114900175	ARSJ;ARSJ	1stExon;5'UTR	N_Shore		TRUE	No
cg22721423	2.25e-08	-----	-0.0140658	1.90497e-05	14	74229364	ELMSAN1	5'UTR	S_Shelf	Enhancer	FALSE	Yes	Yes
cg00162361	2.27e-08	-----	-0.0179852	1.91961e-05	10	80848009	ZMIZ1	5'UTR			FALSE	Yes	Yes
cg12144393	2.28e-08	-----	-0.0195939	1.92349e-05	11	117480983	DSCAML1	Body		Promoter	FALSE	Yes	Yes
cg19563250	2.28e-08	-----	-0.00875705	1.92349e-05	7	110669913	IMMP2L;IMMP2L	Body;Body		Enhancer	FALSE	Yes	Nominally
cg12076915	2.29e-08	-----	-0.0214166	1.92963e-05	19	42430253			N_Shore		TRUE	No
cg23900763	2.31e-08	-----	-0.032508	1.94188e-05	11	250924	PSMD13;PSMD13	Body;Body			FALSE	Yes	Yes
cg27113548	2.31e-08	---?-	-0.0241779	1.94188e-05	14	106354912					TRUE	No
cg12378834	2.36e-08	-----	-0.06289	1.98157e-05	5	134646487	C5orf66	5'UTR			FALSE	Yes	Nominally
cg22473125	2.4e-08	-----	-0.0189213	2.01277e-05	1	90097907	LRRC8C;FLJ27354	TSS1500;Body	N_Shore	Promoter	FALSE	Yes	No
cg14689167	2.45e-08	-----	-0.0211151	2.05228e-05	10	4309215					FALSE	Yes	Nominally
cg12832157	2.47e-08	-----	-0.00904086	2.0666e-05	3	4885491	ITPR1;ITPR1;ITPR1	Body;Body;Body			FALSE	Yes	Nominally
cg26125361	2.48e-08	----?	-0.0149756	2.07252e-05	20	189957					FALSE	Yes	Nominally
cg02986585	2.51e-08	-----	-0.0176873	2.09513e-05	6	41546546	FOXP4;FOXP4;FOXP4	Body;Body;Body			FALSE	Yes	Yes
cg24843790	2.53e-08	-----	-0.0231221	2.10935e-05	21	44727494				Enhancer	FALSE	Yes	Yes
cg03626672	2.55e-08	-----	-0.0624008	2.12353e-05	2	237478664	CXCR7	5'UTR	S_Shore	Promoter	TRUE	No
cg01991625	2.57e-08	-----	-0.0146427	2.13768e-05	16	54404353					TRUE	No
cg11116464	2.59e-08	+++++	0.0223066	2.15179e-05	1	8651231	RERE;RERE	Body;Body			FALSE	Yes	Yes
cg19758958	2.6e-08	-----	-0.0234774	2.15758e-05	11	62319222				Enhancer	FALSE	Yes	Yes
cg02767093	2.62e-08	-----	-0.0105077	2.17164e-05	13	99130655	STK24;STK24	Body;Body	S_Shelf	Enhancer	TRUE	Yes	Yes
cg24587305	2.63e-08	-----	-0.0402226	2.17739e-05	9	38026422	SHB	Body			FALSE	Yes	Yes
cg23621097	2.64e-08	+++++	0.0171732	2.18312e-05	17	1962236	HIC1;HIC1	3'UTR;3'UTR	Island	Promoter	TRUE	No
cg15581007	2.66e-08	+++++	0.0167917	2.19455e-05	5	53520049	ARL15	Body			FALSE	Yes	Nominally
cg09040301	2.66e-08	-----	-0.0078927	2.19455e-05	13	49107519	RCBTB2;RCBTB2;RCBTB2;RCBTB2	TSS200;TSS200;TSS200;TSS200	S_Shore	Enhancer	FALSE	Yes	Yes
cg13001142	2.68e-08	+++++	0.0235231	2.20848e-05	6	147528521	STXBP5;STXBP5	Body;Body	S_Shelf	Enhancer	TRUE	No
cg04350530	2.69e-08	+++++	0.0276656	2.21416e-05	4	140728329	MAML3	Body			FALSE	Yes	Nominally
cg12053816	2.71e-08	-----	-0.0312033	2.22804e-05	10	79034490	KCNMA1;KCNMA1;KCNMA1;KCNMA1;KCNMA1;KCNMA1	Body;Body;Body;Body;Body;Body			FALSE	Yes	No
cg17684034	2.73e-08	-----	-0.0362858	2.24189e-05	5	74862658	POLK	Body		Enhancer	FALSE	Yes	Yes
cg01971407	2.78e-08	-----	-0.0227401	2.28031e-05	11	313624	IFITM1	TSS1500	N_Shelf	Promoter	TRUE	No
cg22786718	2.79e-08	+++++	0.0299437	2.28587e-05	20	2511199				Enhancer	FALSE	Yes	Yes
cg04010861	2.83e-08	-----	-0.03019	2.31597e-05	4	8349838			S_Shore		FALSE	Yes	Yes
cg13505271	2.85e-08	+++++	0.0202972	2.32966e-05	14	105721466	BRF1;BRF1;BRF1;BRF1	Body;Body;Body;Body		Enhancer	FALSE	Yes	Nominally
cg02860470	2.89e-08	+++++	0.0258143	2.35964e-05	6	75649222					FALSE	Yes	No
cg04987734	2.9e-08	+++++	0.0257229	2.36508e-05	14	103415873	CDC42BPB	Body			TRUE	No
cg25875537	2.92e-08	-----	-0.0242549	2.37594e-05	8	21909033			S_Shelf		TRUE	No
cg11430077	2.92e-08	-----	-0.016991	2.37594e-05	10	8099018	GATA3;GATA3	Body;Body	N_Shore	Promoter	TRUE	No
cg22976567	2.93e-08	-----	-0.0122446	2.38135e-05	1	156074182	LMNA	5'UTR		Enhancer	FALSE	Yes	Yes
cg24467989	3e-08	-----	-0.0390077	2.43545e-05	13	41560747	ELF1	5'UTR		Enhancer	FALSE	Yes	Yes
cg23781467	3.05e-08	+++++	0.0112315	2.4704e-05	6	31760233	VARS	Body	N_Shelf		TRUE	No
cg17025683	3.05e-08	-----	-0.0126565	2.4704e-05	1	173836220	SNORD78;ZBTB37;SNORD75;ZBTB37;SNORD76;GAS5;SNORD77;SNORD44	TSS1500;TSS1500;TSS200;TSS1500;TSS1500;Body;TSS1500;TSS1500	N_Shore	Promoter	TRUE	No
cg01969278	3.07e-08	-----	-0.0175776	2.48377e-05	10	63808948	ARID5B;ARID5B	TSS200;Body		Promoter	FALSE	Yes	Nominally
cg07421287	3.1e-08	-----	-0.0292707	2.50518e-05	1	111218287	KCNA3	TSS1500	S_Shore		TRUE	No
cg09956442	3.12e-08	-----	-0.0263725	2.51848e-05	19	18133156				Promoter	FALSE	Yes	Yes
cg03816583	3.14e-08	+++++	0.0252345	2.53175e-05	3	153942348	ARHGEF26;ARHGEF26;ARHGEF26	Body;Body;Body			FALSE	Yes	Nominally
cg18335991	3.15e-08	-----	-0.00943203	2.53693e-05	15	74724562	SEMA7A;SEMA7A;SEMA7A	Body;Body;5'UTR	N_Shore	Promoter	TRUE	No
cg25103895	3.18e-08	-----	-0.02374	2.55819e-05	10	64565642	ADO;ADO	3'UTR;1stExon	Island	Promoter	TRUE	No
cg21845457	3.28e-08	-----	-0.0127988	2.63565e-05	8	65499091			N_Shore		TRUE	Yes	No
cg18982976	3.29e-08	+++++	0.0598632	2.63772e-05	17	61116857	TANC2;MIR548W	Body;Body			FALSE	Yes	No
cg00741986	3.29e-08	-----	-0.0215571	2.63772e-05	4	2748332	TNIP2;TNIP2	Body;Body		Enhancer	TRUE	No
cg17292662	3.3e-08	-----	-0.0325332	2.64276e-05	8	54758936			S_Shelf	Enhancer	TRUE	No
cg23925513	3.35e-08	-----	-0.0145125	2.67978e-05	17	6923526			N_Shore		TRUE	No
cg14371731	3.41e-08	+++?+	0.0180166	2.72471e-05	10	81003175	ZMIZ1	Body	Island	Promoter	TRUE	No
cg02772754	3.48e-08	-----	-0.0335882	2.77751e-05	22	20918630	MED15;MED15;MED15;MED15;MED15;MED15	Body;Body;Body;Body;Body;Body			FALSE	Yes	Yes
cg19459791	3.49e-08	+++++	0.0177654	2.78237e-05	15	65363022			S_Shelf		TRUE	No
cg23842572	3.51e-08	+++?+	0.0139683	2.79518e-05	17	17030253	MPRIP;MPRIP	Body;Body			TRUE	No
cg23248055	3.56e-08	+++++	0.032038	2.83182e-05	4	56185	ZNF718;ZNF595;ZNF595;ZNF595;ZNF595;ZNF718;ZNF718	TSS1500;5'UTR;5'UTR;Body;Body;Body;Body	S_Shelf		FALSE	Yes	Nominally
cg26539571	3.57e-08	-----	-0.0453259	2.8366e-05	6	16731770	ATXN1;ATXN1	5'UTR;5'UTR		Promoter	FALSE	Yes	Yes
cg07139440	3.59e-08	-----	0.00466296	2.8493e-05	1	151030981	CDC42SE1;CDC42SE1;MLLT11	5'UTR;5'UTR;TSS1500	N_Shore	Promoter	TRUE	No
cg21597025	3.6e-08	-----	-0.0258759	2.85405e-05	3	142837564	CHST2	TSS1500	N_Shore	Promoter	TRUE	No
cg11690578	3.61e-08	-----	-0.0251408	2.85879e-05	17	4510827	SMTNL2;SMTNL2	3'UTR;3'UTR	S_Shore		TRUE	No
cg01405107	3.65e-08	-----	-0.0446783	2.88403e-05	17	46671635	LOC404266;LOC404266;LOC404266;HOXB5;LOC404266	Body;Body;Body;TSS1500;Body	N_Shore	Promoter	TRUE	No
cg05339037	3.65e-08	-----	-0.0195612	2.88403e-05	19	13951168			N_Shelf	Promoter	TRUE	No
cg07012823	3.67e-08	+++++	0.0163082	2.89661e-05	6	155777070	NOX3	TSS200			TRUE	No
cg00928816	3.68e-08	-----	-0.0221262	2.90128e-05	10	63809098	ARID5B	Body		Promoter	TRUE	No
cg01293296	3.79e-08	+++++	0.016562	2.98469e-05	3	135790100	PPP2R3A;PPP2R3A;PPP2R3A	Body;Body;Body		Enhancer	FALSE	Yes	Nominally
cg02734052	3.91e-08	+++++	0.0232144	3.07578e-05	14	22944645				Enhancer	FALSE	Yes	Yes
cg01005506	4e-08	-----	-0.0195514	3.1431e-05	10	64565768	ADO;ADO	3'UTR;1stExon	Island	Promoter	TRUE	No
cg17415117	4.01e-08	-----	-0.00454611	3.144e-05	20	43293462	LINC01260	Body		Enhancer	FALSE	Yes	Yes
cg17602444	4.01e-08	-----	-0.0205191	3.144e-05	7	644819	PRKAR1B;PRKAR1B;PRKAR1B;PRKAR1B;PRKAR1B;PRKAR1B	Body;Body;Body;Body;Body;Body	N_Shore	Enhancer	TRUE	No
cg08375515	4.08e-08	-----	-0.0346936	3.19536e-05	17	12694121	LOC100128006;ARHGAP44	TSS1500;Body	S_Shore	Promoter	FALSE	Yes	Yes
cg04573702	4.09e-08	-----	-0.0189898	3.19966e-05	14	23857834	MYH6;MIR208A	Body;Body	N_Shore		TRUE	No
cg13753585	4.14e-08	----?	-0.0530901	3.23522e-05	12	54677175	HNRNPA1P10;HNRNPA1;HNRNPA1	Body;Body;Body	S_Shelf	Promoter	FALSE	Yes	Yes
cg12549632	4.15e-08	+++++	0.0153214	3.23947e-05	16	27741322	KIAA0556	Body			FALSE	Yes	Nominally
cg02325250	4.23e-08	-----	-0.0161492	3.29829e-05	5	131409289	CSF2	TSS200			TRUE	No
cg20032789	4.36e-08	---?-	-0.00409319	3.39593e-05	10	30336565	KIAA1462	Body			TRUE	No
cg14793944	4.38e-08	+++++	0.00443999	3.40777e-05	15	39720155				Enhancer	FALSE	Yes	Nominally
cg23196251	4.41e-08	-----	-0.0118629	3.42736e-05	2	39348582	SOS1	TSS1500	S_Shore	Promoter	FALSE	Yes	Yes
cg11152412	4.46e-08	-----	-0.00649168	3.46243e-05	15	74927688	EDC3;EDC3;EDC3	Body;Body;Body			TRUE	No
cg20547777	4.49e-08	-----	-0.0319704	3.48191e-05	8	119086580	EXT1	Body			TRUE	No
cg00576086	4.51e-08	-----	-0.0166561	3.4898e-05	5	1269066	TERT;TERT	Body;Body	N_Shore	Enhancer	TRUE	Yes	No
cg02736908	4.51e-08	-----	-0.0361436	3.4898e-05	17	29887376			Island		TRUE	No
cg09502149	4.55e-08	-----	-0.0171969	3.51692e-05	1	43406792	SLC2A1	Body		Enhancer	TRUE	No
cg19616007	4.57e-08	-----	-0.00146867	3.52854e-05	3	98272602				Enhancer	FALSE	Yes	Yes
cg18007737	4.61e-08	-----	-0.0280509	3.55556e-05	2	233265159					FALSE	Yes	Yes
cg00699559	4.68e-08	+++++	0.00522681	3.60173e-05	5	419712	AHRR;AHRR	Body;Body	N_Shore		FALSE	Yes	Nominally
cg09764276	4.68e-08	-----	-0.0325213	3.60173e-05	1	9142159				Enhancer	FALSE	Yes	Yes
cg06819357	4.77e-08	+++++	0.0165277	3.66306e-05	14	102928437	TECPR2	Body			TRUE	No
cg14649449	4.77e-08	-----	-0.0119152	3.66306e-05	9	72660082	MAMDC2	Body	S_Shore		TRUE	No
cg11307857	4.78e-08	+++++	0.00610308	3.66677e-05	11	128599031	FLI1;FLI1;FLI1;FLI1	5'UTR;5'UTR;5'UTR;Body		Enhancer	FALSE	Yes	Yes
cg23531049	4.88e-08	+++++	0.0135535	3.73944e-05	15	42075277	MAPKBP1;MAPKBP1	Body;Body		Promoter	TRUE	No
cg07787313	4.92e-08	-----	-0.0380167	3.76603e-05	4	109087499	LEF1-AS1;LEF1;LEF1;LEF1;LEF1;LEF1	TSS1500;1stExon;5'UTR;Body;Body;Body	N_Shore	Promoter	FALSE	Yes	No
cg02340116	5.08e-08	+++++	0.0275564	3.88432e-05	8	54089593					FALSE	Yes	Nominally
cg24033122	5.23e-08	-----	-0.0228729	3.99471e-05	16	30485383	ITGAL;ITGAL	Body;Body	Island	Enhancer	TRUE	No
cg16305292	5.3e-08	+++++	0.020146	4.03949e-05	8	142219965			N_Shore		TRUE	No
cg00139947	5.3e-08	+++?+	0.0144838	4.03949e-05	8	144403371	TOP1MT	Body	Island		TRUE	No
cg13734658	5.31e-08	-----	-0.0131268	4.04278e-05	17	71479021	SDK2	Body			FALSE	Yes	No
cg08946781	5.37e-08	+++++	0.023307	4.08408e-05	17	38732694					FALSE	Yes	Yes
cg21304569	5.4e-08	+++++	0.00891993	4.09812e-05	14	76299369	TTLL5	Body			FALSE	Yes	Nominally
cg17591799	5.4e-08	-----	-0.0148179	4.09812e-05	22	33238802	TIMP3;SYN3;SYN3;SYN3	Body;Body;Body;Body			FALSE	Yes	Nominally
cg17777683	5.41e-08	-----	-0.0261434	4.10133e-05	2	201986522	CFLAR;CFLAR;CFLAR	5'UTR;5'UTR;5'UTR	S_Shelf	Promoter	TRUE	No
cg01176694	5.46e-08	+++++	0.0211452	4.13042e-05	16	14381731			S_Shore		TRUE	No
cg12761472	5.46e-08	-----	-0.0105186	4.13042e-05	6	119031922				Enhancer	TRUE	No
cg09431774	5.47e-08	-----	-0.0116805	4.13358e-05	22	25465561	KIAA1671	Body		Promoter	FALSE	Yes	No
cg15498134	5.58e-08	-----	-0.0212049	4.21222e-05	1	25246854	RUNX3;RUNX3	Body;Body		Enhancer	TRUE	No
cg14711927	5.61e-08	-----	-0.00620564	4.23037e-05	2	70369031			N_Shore	Enhancer	FALSE	Yes	Yes
cg25197194	5.66e-08	+++-+	0.023239	4.26355e-05	3	128758787	CCDC48	3'UTR			TRUE	No
cg15963913	5.68e-08	+++++	0.0113231	4.27409e-05	14	104196003	ZFYVE21	Body	S_Shore		TRUE	No
cg11459681	5.76e-08	-----	-0.0175155	4.3297e-05	11	102322110	TMEM123	Body	N_Shore	Promoter	FALSE	Yes	Yes
cg04583842	5.77e-08	+++++	0.0174355	4.33263e-05	16	88103117	BANP;BANP	Body;Body	S_Shore	Enhancer	TRUE	No
cg16867657	5.86e-08	+++++	0.0101078	4.39556e-05	6	11044877	ELOVL2	TSS1500	Island	Promoter	TRUE	No
cg01744331	5.92e-08	---?-	-0.0207337	4.43588e-05	11	2722358	KCNQ1OT1;KCNQ1;KCNQ1	TSS1500;Body;Body	S_Shore	Promoter	TRUE	No
cg14595618	6.09e-08	+++++	0.025038	4.55634e-05	10	71135446	HK1;HK1;HK1;HK1;HK1	Body;Body;Body;Body;Body			FALSE	Yes	Yes
cg16108246	6.1e-08	-----	-0.0230456	4.55634e-05	10	18689556	CACNB2;CACNB2;CACNB2;CACNB2;CACNB2;CACNB2;CACNB2;CACNB2;CACNB2;CACNB2	5'UTR;1stExon;Body;Body;Body;Body;Body;Body;Body;Body			FALSE	Yes	Nominally
cg14372879	6.1e-08	-----	-0.00865481	4.55634e-05	1	192493801				Enhancer	FALSE	Yes	Yes
cg27086356	6.11e-08	+++++	0.0366352	4.55902e-05	3	170627562	EIF5A2	TSS1500	S_Shore		FALSE	Yes	Yes

## Sheet: S3
Additional file 2: Table S3. Statistically significant CpGs in relation to former vs. non smoking status at false discovery rate (FDR)<0.01
IlmnID	P-value	Effect (+ hypermethylation, - hypomethylation)	Effect size	FDR	Chr	Mapinfo	Gene	Location	Island location	Annotation	In 450k	Novel
cg14391737	4.39e-26	-----	-0.0605604	1.46977e-22	11	86513429	PRSS23;PRSS23;PRSS23;PRSS23;PRSS23;PRSS23;PRSS23	5'UTR;Body;Body;5'UTR;Body;Body;Body	S_Shore		FALSE	Yes
cg21566642	1.04e-25	-----	-0.0402761	1.74096e-22	2	233284661			Island		TRUE	No
cg05575921	4.82e-18	-----	-0.0367059	5.37912e-15	5	373378	AHRR	Body	N_Shore	Enhancer	TRUE	No
cg01940273	3.3e-14	-----	-0.0324215	2.7621e-11	2	233284934			Island		TRUE	No
cg00475490	1.04e-13	-----	-0.0141088	6.96384e-11	11	86517110	PRSS23;PRSS23;PRSS23;PRSS23;PRSS23;PRSS23;PRSS23	5'UTR;Body;Body;5'UTR;Body;Body;Body			FALSE	Yes
cg06972908	2.34e-10	-----	-0.0129228	1.30572e-07	16	30488321	ITGAL;ITGAL	Body;Body	S_Shelf	Enhancer	TRUE	No
cg14753356	1.75e-09	-----	-0.0215894	8.37e-07	6	30720108					TRUE	No
cg05533761	7.15e-09	----?	-0.0347022	2.99228e-06	11	86437953					FALSE	Yes
cg18110140	9.35e-08	-----	-0.0217611	3.4782e-05	15	75350380					FALSE	Yes
cg11660018	1.1e-07	-----	-0.021173	3.6828e-05	11	86510915	PRSS23	TSS1500	N_Shore		TRUE	No
cg13193840	1.49e-07	-----	-0.00944131	4.53502e-05	2	233285289			Island	Promoter	TRUE	No
cg16841366	2.35e-07	-----	-0.0286337	6.54148e-05	2	233286192			S_Shore		FALSE	Yes
cg25189904	2.54e-07	-----	-0.0347634	6.54148e-05	1	68299493	GNG12	TSS1500	S_Shore		TRUE	No
cg00045592	8.8e-07	-----	-0.0242098	0.000196416	1	160714299	SLAMF7;SLAMF7;SLAMF7;SLAMF7;SLAMF7;SLAMF7;SLAMF7;SLAMF7;SLAMF7;SLAMF7	5'UTR;Body;Body;Body;Body;Body;Body;Body;Body;Body		Enhancer	FALSE	Yes
cg11554391	8.55e-07	-----	-0.00809075	0.000196416	5	321320	AHRR	Body	Island	Promoter	TRUE	No
cg17087741	1.39e-06	----+	-0.00280524	0.000290858	2	233283010			N_Shore		TRUE	No
cg09010260	1.58e-06	-----	-0.019745	0.000311167	12	54842484	LOC102724050;LOC102724050	Body;Body			FALSE	Yes
cg17739917	1.73e-06	-----	-0.02063	0.00032178	17	38477572	RARA;RARA;RARA	5'UTR;5'UTR;5'UTR	S_Shelf	Enhancer	FALSE	Yes
cg25061445	1.84e-06	-----	-0.0131468	0.000324227	15	57912784	GCOM1;GCOM1;GCOM1;GCOM1;GCOM1;MYZAP;MYZAP;GCOM1;GCOM1;GCOM1	Body;Body;Body;Body;Body;Body;Body;Body;Body;Body			FALSE	Yes
cg16260976	2.11e-06	-----	-0.0129551	0.000353214	5	134816424					FALSE	Yes
cg19885130	2.85e-06	----?	-0.0242053	0.000430873	11	68146832	LRP5;LRP5	5'UTR;Body		Enhancer	FALSE	Yes
cg01692968	2.8e-06	----+	-0.0230192	0.000430873	9	108005349			N_Shore	Enhancer	TRUE	No
cg12803068	2.96e-06	+++++	0.034455	0.000430873	7	45002919	MYO1G	Body	S_Shore		TRUE	No
cg03999941	3.13e-06	-----	-0.0130492	0.000436635	5	957511			N_Shore	Enhancer	TRUE	Yes
cg05284742	5.18e-06	-----	-0.00776925	0.000693706	14	93552128	ITPK1;ITPK1;ITPK1	Body;Body;Body		Enhancer	TRUE	No
cg06831571	5.78e-06	+++++	0.0161393	0.000744286	11	34592196					FALSE	Yes
cg14096828	9.65e-06	-----	-0.00669256	0.0011966	7	110731116	LRRN3;LRRN3;LRRN3;LRRN3;LRRN3;LRRN3;IMMP2L;IMMP2L	1stExon;1stExon;1stExon;5'UTR;5'UTR;5'UTR;Body;Body			FALSE	Yes
cg13258799	1.54e-05	----+	-0.0175589	0.0017779	15	28413705	HERC2	Body			FALSE	Yes
cg22042546	1.52e-05	++++-	0.0156669	0.0017779	1	27050491	ARID1A;ARID1A	Body;Body		Enhancer	TRUE	No
cg11931220	1.69e-05	-----	-0.0130461	0.00188604	12	49276387					FALSE	Yes
cg07045119	1.81e-05	-----	-0.00756105	0.0019548	20	19194540	SLC24A3	Body	S_Shore		FALSE	Yes
cg23565821	2.36e-05	-----	-0.0131491	0.00246915	6	33385056	CUTA;CUTA;CUTA;CUTA;CUTA	Body;Body;Body;Body;Body	N_Shore	Promoter	TRUE	No
cg05934812	2.44e-05	-----	-0.0102685	0.00247549	5	334322	AHRR;AHRR	Body;Body		Promoter	FALSE	Yes
cg06235438	2.89e-05	----+	-0.0101739	0.0028458	16	30485966	ITGAL;ITGAL	Body;Body	S_Shore	Promoter	TRUE	No
cg05525812	3.09e-05	----+	-0.0104276	0.0028737	2	177022646			N_Shore		TRUE	Yes
cg13787850	3.04e-05	-----	-0.0191852	0.0028737	9	102195951				Enhancer	TRUE	No
cg04180046	3.33e-05	+++++	0.0299767	0.0030132	7	45002736	MYO1G	Body	Island		TRUE	No
cg07251887	4.77e-05	-----	-0.0137925	0.00420262	17	73641809	LOC100130933;RECQL5	TSS1500;Body		Enhancer	TRUE	No
cg09935388	5.09e-05	--+--	-0.0109486	0.00426033	1	92947588	GFI1;GFI1;GFI1	Body;Body;Body	Island		TRUE	No
cg16047567	5.06e-05	-----	-0.0139787	0.00426033	1	12664243	DHRS3	Body		Enhancer	TRUE	No
cg15827092	6.02e-05	-++--	-0.0137018	0.00491584	14	83600849					TRUE	Yes

## Sheet: S4
Additional file 2: Table S4. Statistically significant CpGs in replication meta-anlysis relation to current vs. non smoking status at a Bonferroni adjusted threshold (P-value = 9.5 x 10-5)
IlmnID	beta	se	p-value	Effect (+ hypermethylation, - hypomethylation)
cg17739917	-0.955049	0.034378	8.71e-170	--
cg14391737	-0.957188	0.037279	2.51e-145	--
cg05086879	-0.835177	0.040135	4.11e-96	--
cg00475490	-0.812004	0.039925	6.75e-92	--
cg25845814	-0.759307	0.038384	4.89e-87	--
cg02978227	-0.801193	0.041274	7.01e-84	--
cg18110140	-0.716898	0.037317	3.41e-82	--
cg16841366	-0.785302	0.041357	2.43e-80	--
cg02738868	-0.597659	0.032109	2.83e-77	--
cg17738628	-0.677329	0.042157	4.89e-58	--
cg07741821	-0.644974	0.041523	2.32e-54	--
cg00045592	-0.505809	0.033596	3.54e-51	--
cg25001882	-0.643387	0.04327	5.8e-50	--
cg10041129	-0.47585	0.032567	2.63e-48	--
cg24797066	-0.341554	0.023528	1.05e-47	--
cg09834951	-0.497593	0.034531	4.97e-47	--
cg22222502	-0.558141	0.039536	3.28e-45	--
cg05533761	-0.585577	0.041907	2.51e-44	--
cg10765427	-0.558154	0.040133	6.3e-44	--
cg09945032	-0.587511	0.042897	1.18e-42	--
cg05659611	-0.582314	0.043778	2.49e-40	--
cg05157376	-0.471675	0.035846	1.67e-39	--
cg26673040	-0.570926	0.043676	5.23e-39	--
cg03461577	-0.57628	0.044313	1.26e-38	--
cg22675726	-0.543358	0.042359	1.26e-37	--
cg23162675	-0.492905	0.038504	1.77e-37	--
cg19885130	-0.426845	0.033382	2.14e-37	--
cg09010260	-0.554787	0.04339	2.15e-37	--
cg27271698	-0.477987	0.03786	1.68e-36	--
cg27650500	-0.525322	0.041647	1.95e-36	--
cg07943658	0.42906	0.034335	8.55e-36	++
cg13784607	-0.528247	0.042371	1.23e-35	--
cg16720061	-0.450449	0.036423	4.29e-35	--
cg17651613	-0.530096	0.043074	9.1e-35	--
cg24577031	-0.538038	0.043782	1.13e-34	--
cg05753553	0.529105	0.043221	2.03e-34	++
cg16758086	0.538921	0.044241	4.26e-34	++
cg02732789	-0.515778	0.04248	6.92e-34	--
cg25197654	-0.504308	0.041757	1.52e-33	--
cg12464134	-0.500175	0.041636	3.31e-33	--
cg22551157	-0.439263	0.036648	4.57e-33	--
cg10258214	-0.455654	0.038225	1.01e-32	--
cg16522223	-0.344002	0.028884	1.14e-32	--
cg14335029	-0.459299	0.038568	1.16e-32	--
cg06421013	-0.528942	0.044488	1.46e-32	--
cg06035956	-0.462639	0.039347	6.99e-32	--
cg23407476	-0.472427	0.040201	7.53e-32	--
cg14262884	-0.476163	0.040774	1.79e-31	--
cg07667906	-0.48823	0.041904	2.46e-31	--
cg07390844	-0.436524	0.037684	5.4e-31	--
cg15310518	-0.424367	0.036635	5.4e-31	--
cg01764256	-0.454236	0.039281	6.82e-31	--
cg09338374	0.413801	0.035855	8.89e-31	++
cg01010073	-0.468665	0.04071	1.24e-30	--
cg05009104	0.502953	0.043826	1.88e-30	++
cg12919873	-0.464909	0.040629	2.77e-30	--
cg10413305	-0.46024	0.040295	3.52e-30	--
cg16207944	-0.430827	0.038119	1.38e-29	--
cg20184330	-0.432073	0.038374	2.25e-29	--
cg18268027	-0.476938	0.042574	4.28e-29	--
cg08493167	-0.436886	0.039094	5.83e-29	--
cg00819417	-0.458187	0.041128	8.61e-29	--
cg06362176	-0.356826	0.03205	9.31e-29	--
cg11931220	-0.478281	0.042964	9.46e-29	--
cg07812250	-0.408664	0.036765	1.14e-28	--
cg15277721	-0.445699	0.040322	2.28e-28	--
cg20174472	-0.362953	0.033019	4.5e-28	--
cg17439633	-0.468927	0.042718	5.3e-28	--
cg06521527	-0.46343	0.042319	7.1e-28	--
cg23337648	-0.484814	0.044348	8.74e-28	--
cg22440155	0.456415	0.04176	8.98e-28	++
cg05198378	-0.430838	0.039572	1.43e-27	--
cg08282118	-0.385459	0.035489	1.9e-27	--
cg05445320	-0.456845	0.042249	3.21e-27	--
cg04902004	-0.468442	0.043398	3.96e-27	--
cg20832643	-0.47901	0.044571	6.59e-27	--
cg15526732	-0.415255	0.038788	1.03e-26	--
cg08215583	-0.458422	0.042845	1.1e-26	--
cg12329529	-0.42121	0.0394	1.21e-26	--
cg14162418	-0.416978	0.039064	1.45e-26	--
cg23683079	-0.465834	0.043695	1.67e-26	--
cg04182427	-0.471065	0.044309	2.29e-26	--
cg01868616	-0.334869	0.031605	3.37e-26	--
cg22721423	-0.421428	0.039994	6.25e-26	--
cg05113537	-0.332627	0.031584	6.66e-26	--
cg21026639	-0.274144	0.02605	7.23e-26	--
cg03028088	-0.416714	0.039639	8.11e-26	--
cg04414766	0.443002	0.042165	8.69e-26	++
cg07803149	-0.442247	0.042117	9.25e-26	--
cg13849276	-0.380175	0.036218	9.59e-26	--
cg15964874	0.451326	0.04314	1.39e-25	++
cg18158149	-0.418708	0.040205	2.29e-25	--
cg16142959	-0.457792	0.04415	3.68e-25	--
cg09279763	-0.442727	0.042789	4.65e-25	--
cg05466844	-0.443763	0.042937	5.24e-25	--
cg19832381	-0.425709	0.041208	5.5e-25	--
cg08343624	-0.417268	0.040563	8.65e-25	--
cg18844158	-0.374444	0.036452	1.01e-24	--
cg23662846	-0.460032	0.04486	1.21e-24	--
cg10068045	-0.45427	0.04449	1.9e-24	--
cg01926616	-0.312861	0.030855	3.94e-24	--
cg20294744	-0.446328	0.044029	4.05e-24	--
cg02775989	0.366965	0.036412	7.39e-24	++
cg25061445	-0.436354	0.043442	1.04e-23	--
cg18060905	-0.440075	0.044011	1.64e-23	--
cg15241876	-0.447284	0.044887	2.33e-23	--
cg24171547	-0.391382	0.03961	5.39e-23	--
cg15167811	-0.426118	0.043184	6.15e-23	--
cg24843790	-0.403157	0.040966	8e-23	--
cg16251918	-0.419902	0.042692	8.46e-23	--
cg02920129	-0.426348	0.043417	9.89e-23	--
cg17684034	-0.347203	0.035408	1.14e-22	--
cg12009405	-0.419075	0.042878	1.56e-22	--
cg08565469	-0.431279	0.044222	1.92e-22	--
cg08792700	-0.385012	0.039504	2.04e-22	--
cg05934812	-0.294946	0.030409	3.24e-22	--
cg24587305	-0.420222	0.043368	3.56e-22	--
cg07865653	-0.432608	0.044676	3.79e-22	--
cg23409325	-0.401586	0.041482	3.87e-22	--
cg09956442	-0.402846	0.041672	4.44e-22	--
cg01247535	-0.356181	0.036848	4.47e-22	--
cg26942477	-0.368243	0.038191	5.66e-22	--
cg27521648	-0.407456	0.042394	7.65e-22	--
cg14526576	-0.354357	0.036927	8.86e-22	--
cg15396830	-0.406349	0.042377	9.48e-22	--
cg07978331	-0.322749	0.033681	1.01e-21	--
cg20540629	-0.355655	0.037414	2.11e-21	--
cg02786370	-0.36488	0.038468	2.58e-21	--
cg14377032	-0.334747	0.035464	4e-21	--
cg03686998	-0.315708	0.033556	5.37e-21	--
cg05547483	-0.363048	0.038646	6.13e-21	--
cg26237233	-0.408081	0.043448	6.24e-21	--
cg26892401	-0.421099	0.044889	6.96e-21	--
cg00010201	-0.403652	0.043045	7.19e-21	--
cg15051432	-0.403068	0.04299	7.29e-21	--
cg21575225	-0.403708	0.043096	7.89e-21	--
cg04284610	-0.417988	0.044696	9.17e-21	--
cg22976567	-0.401502	0.042985	1.02e-20	--
cg07267541	-0.381174	0.040867	1.16e-20	--
cg22786718	0.395785	0.042555	1.48e-20	++
cg18871648	-0.373252	0.040156	1.56e-20	--
cg14096828	-0.334533	0.036018	1.67e-20	--
cg01641754	-0.386977	0.041917	2.82e-20	--
cg01094982	-0.408907	0.04437	3.28e-20	--
cg00271766	-0.411905	0.044706	3.35e-20	--
cg02695372	-0.333552	0.036334	4.58e-20	--
cg09123897	-0.384533	0.042139	7.59e-20	--
cg15328025	-0.353152	0.03885	1.05e-19	--
cg17419818	-0.393326	0.043371	1.28e-19	--
cg20328799	0.370471	0.040931	1.5e-19	++
cg24211550	-0.341859	0.037823	1.69e-19	--
cg16565224	-0.343715	0.038042	1.74e-19	--
cg16470128	-0.357922	0.039619	1.75e-19	--
cg13531599	0.355784	0.03943	1.94e-19	++
cg23954423	-0.40087	0.044432	1.96e-19	--
cg05704547	0.390338	0.043292	2.06e-19	++
cg13117318	-0.304498	0.033839	2.43e-19	--
cg26539571	-0.370967	0.041263	2.61e-19	--
cg13025388	-0.375524	0.041945	3.68e-19	--
cg02141604	-0.381333	0.042613	3.81e-19	--
cg10358466	-0.39057	0.04373	4.46e-19	--
cg06053307	-0.390954	0.043813	4.79e-19	--
cg02772754	-0.390342	0.043867	6e-19	--
cg08714510	-0.36841	0.041495	7.18e-19	--
cg23025288	-0.399337	0.045103	8.95e-19	--
cg00731338	0.393209	0.044488	1.03e-18	++
cg05752866	-0.361025	0.040912	1.16e-18	--
cg02786339	-0.370817	0.042044	1.21e-18	--
cg14180330	-0.289554	0.033365	4.24e-18	--
cg11320225	-0.334819	0.038656	4.92e-18	--
cg06062640	-0.368038	0.042753	7.82e-18	--
cg17342080	-0.35296	0.041046	8.48e-18	--
cg09251068	-0.363871	0.042489	1.15e-17	--
cg19616007	-0.363227	0.042435	1.2e-17	--
cg09303399	-0.270628	0.031662	1.33e-17	--
cg17309085	-0.377884	0.044217	1.34e-17	--
cg22702259	-0.273656	0.032098	1.6e-17	--
cg07045119	-0.374885	0.044017	1.73e-17	--
cg19701538	-0.297696	0.035233	3.09e-17	--
cg03530002	-0.374959	0.044427	3.35e-17	--
cg21702517	-0.372897	0.044243	3.7e-17	--
cg15480998	-0.341571	0.0406	4.21e-17	--
cg02986585	-0.271629	0.032324	4.57e-17	--
cg22829098	0.318705	0.037941	4.71e-17	++
cg24617344	-0.33048	0.039429	5.5e-17	--
cg26992381	-0.31736	0.037907	5.97e-17	--
cg06299644	-0.277076	0.033124	6.34e-17	--
cg26686403	-0.376826	0.045086	6.72e-17	--
cg04003530	0.378571	0.045373	7.6e-17	++
cg14491800	-0.279656	0.033529	7.78e-17	--
cg25054107	-0.360775	0.043319	8.63e-17	--
cg01756827	0.372649	0.044766	8.92e-17	++
cg15653143	-0.269474	0.032381	9.1e-17	--
cg12609247	-0.293817	0.035333	9.61e-17	--
cg00506062	-0.326113	0.039329	1.17e-16	--
cg12466556	0.357202	0.043146	1.31e-16	++
cg15851905	-0.342894	0.041506	1.52e-16	--
cg07278718	0.26344	0.031893	1.53e-16	++
cg01307360	-0.323856	0.039217	1.56e-16	--
cg22573230	-0.338535	0.041002	1.58e-16	--
cg01944380	-0.372797	0.045183	1.66e-16	--
cg03977382	-0.353418	0.042915	1.88e-16	--
cg12144393	-0.279768	0.034015	2.06e-16	--
cg23508991	-0.369469	0.044946	2.13e-16	--
cg11307857	0.332584	0.040465	2.16e-16	++
cg12619810	-0.359342	0.043869	2.72e-16	--
cg24306398	-0.330098	0.040337	2.9e-16	--
cg25331593	-0.324005	0.039683	3.38e-16	--
cg24665592	-0.370255	0.045375	3.52e-16	--
cg25730803	-0.311835	0.038372	4.64e-16	--
cg11047325	-0.355585	0.043889	5.69e-16	--
cg03140410	-0.366417	0.045284	6.19e-16	--
cg05207730	0.358539	0.044378	6.85e-16	++
cg24021808	0.316861	0.0393	7.85e-16	++
cg00162361	-0.336249	0.041922	1.1e-15	--
cg23902113	-0.301475	0.03759	1.11e-15	--
cg15088912	-0.306623	0.038398	1.47e-15	--
cg25520710	-0.329337	0.041356	1.75e-15	--
cg20534846	-0.329219	0.041353	1.79e-15	--
cg18007737	-0.35613	0.044757	1.85e-15	--
cg24688401	-0.290673	0.036758	2.75e-15	--
cg13343932	-0.348791	0.044143	2.89e-15	--
cg08673945	-0.35825	0.045358	2.96e-15	--
cg06831571	0.324877	0.041163	3.11e-15	++
cg01593408	-0.345211	0.043816	3.47e-15	--
cg01237738	-0.246989	0.031392	3.78e-15	--
cg07948323	0.348272	0.044271	3.81e-15	++
cg22014359	-0.31688	0.040331	4.12e-15	--
cg13433259	-0.318602	0.040662	4.9e-15	--
cg21863544	-0.342847	0.043826	5.41e-15	--
cg27086356	0.27445	0.03515	6.09e-15	++
cg21774980	-0.27571	0.035402	7.14e-15	--
cg07330742	-0.277682	0.03566	7.19e-15	--
cg23196251	-0.266481	0.034287	8.08e-15	--
cg24207603	-0.283011	0.036518	9.63e-15	--
cg15160624	-0.343847	0.044494	1.14e-14	--
cg25942611	0.322554	0.041742	1.15e-14	++
cg08946781	0.315173	0.040886	1.33e-14	++
cg05940455	-0.342905	0.044517	1.39e-14	--
cg03253449	-0.328856	0.042743	1.5e-14	--
cg01895164	-0.267055	0.034768	1.65e-14	--
cg05307394	-0.276034	0.036058	2.02e-14	--
cg09360036	0.275894	0.036079	2.15e-14	++
cg14535553	-0.317057	0.04157	2.51e-14	--
cg18644227	-0.278553	0.036565	2.69e-14	--
cg08445278	0.328157	0.043126	2.88e-14	++
cg25614265	-0.338767	0.0446	3.2e-14	--
cg21163477	-0.210188	0.027687	3.3e-14	--
cg14595618	0.282191	0.037279	3.91e-14	++
cg16111704	-0.31443	0.041644	4.53e-14	--
cg10217853	-0.313514	0.041614	5.15e-14	--
cg09098393	-0.300217	0.040131	7.71e-14	--
cg23583523	-0.302159	0.040413	7.95e-14	--
cg19758958	-0.290692	0.038963	8.98e-14	--
cg18963236	-0.319304	0.042816	9.2e-14	--
cg02734052	0.307785	0.04136	1.04e-13	++
cg13682152	-0.333005	0.044811	1.12e-13	--
cg15133043	0.316377	0.04266	1.26e-13	++
cg24467989	-0.321879	0.043426	1.3e-13	--
cg18105732	-0.29519	0.039917	1.48e-13	--
cg14128479	-0.245977	0.033287	1.54e-13	--
cg08902828	-0.326228	0.044176	1.59e-13	--
cg04700809	-0.327939	0.04456	1.92e-13	--
cg15885703	-0.28501	0.038808	2.16e-13	--
cg23900763	-0.302882	0.041243	2.16e-13	--
cg20481941	-0.32295	0.043974	2.16e-13	--
cg23535194	-0.260584	0.03549	2.19e-13	--
cg11960913	-0.268211	0.03658	2.36e-13	--
cg24227782	-0.32632	0.044581	2.59e-13	--
cg20178893	-0.23799	0.032592	2.95e-13	--
cg10587886	-0.317444	0.043568	3.32e-13	--
cg01651583	0.29587	0.040622	3.39e-13	++
cg13753585	-0.324592	0.044577	3.44e-13	--
cg22792560	0.302398	0.041675	4.15e-13	++
cg12710546	0.269808	0.037194	4.21e-13	++
cg11459681	-0.218183	0.030212	5.34e-13	--
cg18110714	-0.221876	0.030758	5.68e-13	--
cg09656629	-0.302706	0.04202	6.09e-13	--
cg00717494	-0.286828	0.039881	6.65e-13	--
cg02767093	-0.322	0.044856	7.34e-13	?-
cg23491443	0.311366	0.043497	8.5e-13	++
cg03786093	-0.262271	0.036822	1.1e-12	--
cg27444020	0.301846	0.042404	1.14e-12	++
cg10496919	-0.265745	0.037371	1.2e-12	--
cg26987759	0.32368	0.045784	1.61e-12	++
cg04560781	0.280963	0.039884	1.94e-12	++
cg14549158	-0.290792	0.041305	2e-12	--
cg17631924	0.266554	0.037933	2.19e-12	++
cg14372879	-0.311613	0.044489	2.58e-12	--
cg17588460	-0.310441	0.044381	2.76e-12	--
cg17290454	0.228195	0.032637	2.82e-12	++
cg12804716	0.311303	0.044668	3.31e-12	++
cg06708913	-0.297503	0.042842	3.95e-12	--
cg11148327	-0.26459	0.038139	4.14e-12	--
cg09965980	-0.290743	0.041949	4.34e-12	--
cg03910896	-0.292707	0.042276	4.57e-12	--
cg22585799	-0.251364	0.036362	4.93e-12	--
cg01435315	-0.309546	0.044889	5.56e-12	--
cg21199085	0.310084	0.045081	6.28e-12	++
cg06671242	0.312056	0.045518	7.36e-12	++
cg17805294	-0.253584	0.037015	7.61e-12	--
cg22375046	-0.27054	0.039626	8.97e-12	--
cg09609957	-0.20349	0.029827	9.29e-12	--
cg14711927	-0.300028	0.043984	9.36e-12	--
cg10092685	-0.288909	0.042397	9.82e-12	--
cg07097487	0.221263	0.032504	1.03e-11	++
cg18522582	-0.282077	0.041483	1.09e-11	--
cg08208903	-0.300334	0.044241	1.17e-11	--
cg21684640	0.29919	0.044158	1.29e-11	++
cg04010861	-0.277611	0.041035	1.38e-11	--
cg19881433	-0.269687	0.040038	1.69e-11	--
cg06586615	-0.254315	0.037914	2.05e-11	--
cg07256895	0.213789	0.032118	2.91e-11	++
cg16220933	0.260321	0.039136	3e-11	++
cg08515723	-0.28275	0.04254	3.1e-11	--
cg11116464	0.295947	0.044578	3.27e-11	++
cg06049452	-0.228252	0.034466	3.65e-11	--
cg17739573	-0.2688	0.040625	3.81e-11	--
cg00977926	0.259464	0.039231	3.88e-11	++
cg02078001	-0.26426	0.03998	3.99e-11	--
cg00238470	-0.26308	0.039888	4.39e-11	--
cg08872577	0.268284	0.040679	4.4e-11	++
cg05866990	0.266246	0.0404	4.54e-11	++
cg06555319	0.296091	0.04506	5.17e-11	++
cg18641655	0.30147	0.045988	5.74e-11	++
cg11307144	-0.278339	0.04247	5.8e-11	--
cg22232492	0.273534	0.041738	5.81e-11	++
cg04455670	-0.272824	0.041641	5.88e-11	--
cg14988493	0.208785	0.031929	6.4e-11	++
cg05816188	-0.293226	0.044913	6.86e-11	--
cg07663850	-0.209642	0.032145	7.19e-11	--
cg05480247	0.290239	0.044508	7.22e-11	++
cg26882556	-0.27917	0.043144	1.01e-10	--
cg13459171	-0.281018	0.04357	1.16e-10	--
cg03757296	-0.267381	0.041491	1.2e-10	--
cg01310332	0.245915	0.038237	1.31e-10	++
cg13705457	0.259991	0.040565	1.51e-10	++
cg14551458	-0.28208	0.044075	1.6e-10	--
cg00260810	-0.240507	0.037651	1.74e-10	--
cg14214717	0.275918	0.043279	1.88e-10	++
cg18115286	-0.262624	0.041288	2.07e-10	--
cg02042026	0.250165	0.039375	2.17e-10	++
cg14768892	-0.201393	0.031789	2.45e-10	--
cg06034194	-0.264322	0.041946	3.04e-10	--
cg09764276	-0.248936	0.039593	3.33e-10	--
cg21804649	-0.478692	0.076342	3.72e-10	-?
cg25290553	-0.249295	0.039797	3.87e-10	--
cg04213565	0.2557	0.040888	4.14e-10	++
cg15434733	-0.27635	0.044244	4.34e-10	--
cg05723029	0.268424	0.04332	5.96e-10	++
cg15581007	0.24695	0.039931	6.42e-10	++
cg08331284	-0.217468	0.035163	6.42e-10	--
cg23068081	-0.234977	0.037997	6.44e-10	--
cg07448120	-0.256182	0.04159	7.51e-10	--
cg00699559	0.209267	0.034	7.75e-10	++
cg04369835	0.283757	0.046118	7.84e-10	++
cg06566669	-0.281244	0.045741	8.05e-10	--
cg05726450	0.233056	0.037923	8.22e-10	++
cg22256420	-0.220187	0.035947	9.32e-10	--
cg24667400	0.264337	0.043195	9.66e-10	++
cg16508202	0.270186	0.044216	1.02e-09	++
cg23883522	0.200681	0.032854	1.04e-09	++
cg26014782	0.265526	0.043492	1.06e-09	++
cg26342454	-0.269983	0.044235	1.07e-09	--
cg02423587	0.259101	0.042468	1.09e-09	++
cg19278199	-0.251266	0.041193	1.09e-09	--
cg13258799	-0.282525	0.046345	1.12e-09	-?
cg08353847	0.2698	0.044404	1.27e-09	++
cg08025679	-0.236897	0.039125	1.45e-09	--
cg05465666	-0.254791	0.04211	1.49e-09	--
cg14513685	-0.222922	0.036901	1.58e-09	--
cg26687886	0.214448	0.035732	2.01e-09	++
cg10189850	0.210249	0.035063	2.08e-09	++
cg09981964	0.221337	0.036916	2.08e-09	++
cg02919526	-0.273645	0.045648	2.1e-09	--
cg18581607	0.258471	0.043291	2.43e-09	++
cg26332838	-0.261951	0.044356	3.61e-09	--
cg15415882	-0.242576	0.04117	3.92e-09	--
cg01213463	-0.25019	0.042583	4.34e-09	--
cg01821920	-0.209973	0.035805	4.63e-09	--
cg10582712	-0.216545	0.036967	4.82e-09	--
cg04009575	-0.169282	0.028929	5e-09	--
cg16143121	0.241701	0.041371	5.29e-09	++
cg16176702	0.226822	0.038992	6.15e-09	++
cg15167367	-0.207817	0.035741	6.25e-09	--
cg04327143	0.186445	0.032068	6.26e-09	++
cg13681954	-0.245055	0.042355	7.41e-09	--
cg25429619	0.246654	0.042823	8.64e-09	++
cg25037104	0.25736	0.044691	8.71e-09	++
cg21380990	-0.245278	0.04266	9.18e-09	--
cg14689167	-0.235128	0.04093	9.45e-09	--
cg05663968	0.220924	0.038822	1.3e-08	++
cg21915904	-0.234944	0.041408	1.43e-08	--
cg17547179	-0.216598	0.038234	1.51e-08	--
cg22486366	-0.193603	0.034314	1.72e-08	--
cg08375515	-0.236412	0.041925	1.75e-08	--
cg13318355	0.197556	0.035055	1.79e-08	++
cg11683390	-0.232624	0.041446	2.04e-08	--
cg14471778	0.217196	0.038703	2.05e-08	++
cg05218021	0.221025	0.039419	2.11e-08	++
cg21304569	0.216752	0.038718	2.22e-08	++
cg24126994	-0.255824	0.045735	2.28e-08	--
cg05613192	-0.238468	0.042702	2.4e-08	--
cg12441500	-0.175511	0.031662	3.04e-08	--
cg14455466	0.2247	0.040538	3.05e-08	++
cg09156714	0.227525	0.041186	3.39e-08	++
cg19373778	-0.238951	0.043612	4.38e-08	--
cg16712581	0.229066	0.042096	5.4e-08	++
cg01969278	-0.13428	0.02481	6.36e-08	--
cg09449447	0.211069	0.039031	6.53e-08	++
cg13505271	0.224425	0.041524	6.64e-08	++
cg01388711	-0.21098	0.039111	7.03e-08	--
cg15387619	0.23014	0.042698	7.21e-08	++
cg03764753	-0.224524	0.041666	7.26e-08	--
cg04664595	-0.230935	0.043203	9.23e-08	--
cg21885332	-0.223367	0.041839	9.57e-08	--
cg26031947	-0.238273	0.044685	9.91e-08	--
cg26747079	0.225677	0.042634	1.23e-07	++
cg19563250	-0.217583	0.041145	1.26e-07	--
cg25984701	0.225346	0.042742	1.38e-07	++
cg03779490	-0.230822	0.043839	1.43e-07	--
cg11487438	0.207587	0.03948	1.49e-07	++
cg06047127	0.236665	0.045118	1.59e-07	++
cg04061293	-0.232328	0.044399	1.71e-07	--
cg09511513	-0.209514	0.040312	2.06e-07	--
cg09040301	-0.206317	0.039723	2.1e-07	--
cg15801526	0.229302	0.04439	2.45e-07	++
cg15562617	-0.182068	0.035541	3.07e-07	--
cg09709426	0.220263	0.04334	3.8e-07	++
cg23248055	0.212415	0.041919	4.11e-07	++
cg27635797	-0.197584	0.039149	4.58e-07	--
cg16895116	-0.220637	0.043976	5.34e-07	--
cg08434071	-0.226984	0.045596	6.54e-07	--
cg12549632	0.148189	0.029889	7.25e-07	++
cg02008229	0.214401	0.043986	1.11e-06	++
cg11591924	-0.216017	0.044343	1.13e-06	--
cg17415117	-0.212022	0.043612	1.19e-06	--
cg16146513	0.198601	0.04107	1.35e-06	++
cg00232091	-0.213981	0.044497	1.54e-06	--
cg02497737	0.171335	0.035642	1.56e-06	++
cg10816539	-0.160557	0.033411	1.57e-06	--
cg16941634	-0.209836	0.043951	1.83e-06	--
cg17050747	-0.211088	0.044218	1.84e-06	--
cg12378834	-0.195265	0.040931	1.87e-06	--
cg11225759	-0.187907	0.039479	1.97e-06	--
cg27230739	0.19793	0.041601	1.99e-06	++
cg02327909	0.200387	0.042258	2.15e-06	++
cg21668652	0.191883	0.040464	2.15e-06	++
cg02372435	0.162686	0.034598	2.62e-06	++
cg17591799	-0.20906	0.044483	2.65e-06	--
cg16959792	-0.209229	0.045047	3.46e-06	--
cg02095838	-0.197242	0.0429	4.34e-06	--
cg04243090	-0.201478	0.043941	4.6e-06	--
cg03816583	0.157058	0.034276	4.67e-06	++
cg21095779	-0.201342	0.043944	4.68e-06	--
cg21323941	0.195245	0.042874	5.34e-06	++
cg24616450	0.177329	0.039054	5.69e-06	++
cg25661658	-0.19517	0.043128	6.12e-06	--
cg15490177	0.189413	0.041917	6.31e-06	++
cg04002038	0.179722	0.039811	6.44e-06	++
cg06344992	0.194343	0.043999	1.01e-05	++
cg25991374	0.198574	0.045434	1.26e-05	++
cg02243025	-0.19357	0.044394	1.32e-05	--
cg03052614	0.187799	0.043163	1.37e-05	++
cg15627993	0.170517	0.039205	1.38e-05	++
cg11219720	-0.128438	0.029936	1.81e-05	--
cg06517956	0.160837	0.037527	1.84e-05	++
cg25222362	0.184105	0.043082	1.95e-05	++
cg16324526	0.168893	0.03959	2.01e-05	++
cg10143064	0.122384	0.0287	2.03e-05	++
cg06119833	-0.193024	0.045371	2.12e-05	--
cg03924136	0.184964	0.043783	2.42e-05	++
cg02340116	0.187286	0.044363	2.45e-05	++
cg11943735	0.184648	0.043766	2.48e-05	++
cg04350530	0.16338	0.038718	2.48e-05	++
cg09499939	-0.170383	0.041195	3.57e-05	--
cg25964299	0.151865	0.036736	3.61e-05	++
cg11830461	-0.165013	0.039974	3.7e-05	--
cg14793944	0.096663	0.023541	4.07e-05	++
cg12999836	-0.162725	0.03972	4.24e-05	--
cg01293296	0.171388	0.042097	4.73e-05	++
cg10719303	0.151812	0.037296	4.74e-05	++
cg07893565	0.173519	0.042732	4.95e-05	++
cg26125361	-0.179784	0.044625	5.66e-05	--
cg12832157	-0.127669	0.032014	6.73e-05	--
cg27022614	-0.321619	0.082097	9.03e-05	-?

## Sheet: S5
Additional file 2: Table S5. Pathway Analysis (IPA) results
Ingenuity Canonical Pathways	Pvalue	Genes
Telomerase Signaling	2.69153e-08	AKT1,CDKN1A,E2F1,ELF1,ELK3,ETS1,ETS2,PIK3R5,PIK3R6,PPP2R3A,RALA,RB1,SOS1,TERT
Molecular Mechanisms of Cancer	3.38844e-07	ADCY9,AKT1,ARHGEF3,CDK6,CDKN1A,CFLAR,E2F1,GAB2,GNA12,GNAO1,HHAT,HIPK2,LEF1,LRP5,NF1,NOTCH1,PIK3R5,PIK3R6,PRKAR1B,RALA,RAPGEF1,RB1,RHOG,SMAD3,SOS1
Chronic Myeloid Leukemia Signaling	9.54993e-07	AKT1,CDK6,CDKN1A,E2F1,GAB2,MECOM,PIK3R5,PIK3R6,RALA,RB1,SMAD3,SOS1
Non-Small Cell Lung Cancer Signaling	1.7378e-06	AKT1,CDK6,E2F1,FHIT,ITPR1,PIK3R5,PIK3R6,RALA,RB1,SOS1
Thrombin Signaling	4.36516e-06	ADCY9,AKT1,ARHGEF3,F2RL3,GATA3,GNA12,GNAO1,GNG12,GNG7,ITPR1,MPRIP,PIK3R5,PIK3R6,RALA,RHOG,SOS1
HGF Signaling	1.31826e-05	AKT1,CDKN1A,ELF1,ELK3,ETS1,ETS2,PIK3R5,PIK3R6,RALA,RAPGEF1,SOS1
Insulin Receptor Signaling	2.18776e-05	AKT1,GRB10,INPP5F,PIK3R5,PIK3R6,PRKAR1B,RALA,RAPGEF1,RPTOR,SOCS3,SOS1,SYNJ2
Integrin Signaling	2.5704e-05	AKT1,ARF1,ARHGAP26,ITGA2B,ITGAL,LIMS1,MPRIP,NEDD9,PIK3R5,PIK3R6,RALA,RAPGEF1,RHOG,SOS1,TSPAN4
Glioblastoma Multiforme Signaling	2.63027e-05	AKT1,CDK6,CDKN1A,E2F1,ITPR1,LEF1,NF1,PIK3R5,PIK3R6,RALA,RB1,RHOG,SOS1
Melanoma Signaling	5.49541e-05	AKT1,CDKN1A,E2F1,PIK3R5,PIK3R6,RALA,RB1
Pancreatic Adenocarcinoma Signaling	6.30957e-05	AKT1,CDKN1A,E2F1,NOTCH1,PIK3R5,PIK3R6,PLD2,RALA,RB1,SMAD3
CREB Signaling in Neurons	7.07946e-05	ADCY9,AKT1,CACNB2,GNA12,GNAO1,GNG12,GNG7,GRIK4,ITPR1,PIK3R5,PIK3R6,PRKAR1B,RALA,SOS1
Prostate Cancer Signaling	8.12831e-05	AKT1,CDKN1A,E2F1,LEF1,PIK3R5,PIK3R6,RALA,RB1,SOS1
Endocannabinoid Developing Neuron Pathway	9.77237e-05	ADCY9,AKT1,GNAO1,GNG7,MAPK7,PIK3R5,PIK3R6,PRKAR1B,RALA,RPTOR
ERK/MAPK Signaling	0.000131826	DUSP4,ELF1,ELK3,ETS1,ETS2,PIK3R5,PIK3R6,PPARG,PPP2R3A,PRKAR1B,RALA,RAPGEF1,SOS1
Synaptogenesis Signaling Pathway	0.00018197	ADCY9,AKT1,AP2M1,CDH23,CNTNAP2,ITPR1,PIK3R5,PIK3R6,PRKAR1B,RALA,RAPGEF1,SOS1,STXBP2,STXBP5,SYN2,SYN3,THBS1
Renal Cell Carcinoma Signaling	0.000186209	AKT1,ETS1,PIK3R5,PIK3R6,RALA,RAPGEF1,SLC2A1,SOS1
Breast Cancer Regulation by Stathmin1	0.000190546	ADCY9,ARHGEF3,CDKN1A,E2F1,GNG12,GNG7,ITPR1,PIK3R5,PIK3R6,PPP2R3A,PRKAR1B,RALA,SOS1
Relaxin Signaling	0.000194984	ADCY9,AKT1,GNA12,GNAO1,GNG12,GNG7,PDE10A,PDE1C,PIK3R5,PIK3R6,PRKAR1B
IGF-1 Signaling	0.000223872	AKT1,GRB10,PIK3R5,PIK3R6,PRKAR1B,RALA,SOCS3,SOS1,YWHAE
HER-2 Signaling in Breast Cancer	0.000263027	AKT1,CDK6,CDKN1A,PARD3,PIK3R5,PIK3R6,RALA,SOS1
PI3K/AKT Signaling	0.00030903	AKT1,CDKN1A,GAB2,INPP5F,LIMS1,PPP2R3A,RALA,SOS1,SYNJ2,YWHAE
Glioma Signaling	0.000346737	AKT1,CDK6,CDKN1A,E2F1,PIK3R5,PIK3R6,RALA,RB1,SOS1
Actin Cytoskeleton Signaling	0.000457088	FGF23,GNA12,GNG12,IQGAP2,MPRIP,MYH6,PIK3R5,PIK3R6,RALA,SOS1,SSH1,SSH2,TRIO
GM-CSF Signaling	0.000467735	AKT1,CSF2,ETS1,PIK3R5,PIK3R6,RALA,SOS1
Opioid Signaling Pathway	0.000501187	ADCY9,AKT1,AP2M1,ARRB1,CACNB2,GNAO1,GNG7,ITPR1,MAPK7,PDE1C,PLD2,PRKAR1B,RALA,SOS1
Small Cell Lung Cancer Signaling	0.000512861	AKT1,CDK6,E2F1,FHIT,PIK3R5,PIK3R6,RB1
CXCR4 Signaling	0.000524807	ADCY9,AKT1,GNA12,GNAO1,GNG12,GNG7,ITPR1,PIK3R5,PIK3R6,RALA,RHOG
Colorectal Cancer Metastasis Signaling	0.000562341	ADCY9,AKT1,ARRB1,GNG12,GNG7,LEF1,LRP5,PIK3R5,PIK3R6,PRKAR1B,RALA,RHOG,SMAD3,SOS1
Aryl Hydrocarbon Receptor Signaling	0.00057544	AHRR,CDK6,CDKN1A,E2F1,GSTO2,NFE2L2,NFIB,RARA,RARG,RB1
Endocannabinoid Cancer Inhibition Pathway	0.00057544	ADCY9,AKT1,CDKN1A,GNAO1,GPR55,LEF1,PIK3R5,PIK3R6,PRKAR1B,RPTOR
G Beta Gamma Signaling	0.00074131	AKT1,CACNB2,GNA12,GNAO1,GNG12,GNG7,PRKAR1B,RALA,SOS1
p53 Signaling	0.00074131	AKT1,CDKN1A,E2F1,HIPK2,PIK3R5,PIK3R6,RB1,THBS1
IL-7 Signaling Pathway	0.000891251	AKT1,BCL6,CXCR5,PIK3R5,PIK3R6,SLC2A1,SOS1
PTEN Signaling	0.000933254	AKT1,CDKN1A,FLT1,INPP5F,MAGI1,PIK3R5,RALA,SOS1,SYNJ2
SAPK/JNK Signaling	0.000954993	DUSP4,GNA12,GNG7,MINK1,PIK3R5,PIK3R6,RALA,SOS1
IL-3 Signaling	0.000977237	AKT1,GAB2,PIK3R5,PIK3R6,RALA,RAPGEF1,SOS1
P2Y Purigenic Receptor Signaling Pathway	0.000977237	ADCY9,AKT1,GNG12,GNG7,ITGA2B,PIK3R5,PIK3R6,PRKAR1B,RALA
Role of NFAT in Regulation of the Immune Response	0.001	AKT1,GNA12,GNAO1,GNG12,GNG7,ITPR1,PIK3R5,PIK3R6,RALA,RCAN2,SOS1
JAK/Stat Signaling	0.00104713	AKT1,CDKN1A,PIK3R5,PIK3R6,RALA,SOCS3,SOS1
GÎ±12/13 Signaling	0.00114815	AKT1,CDH23,F2RL3,GNA12,LPAR6,MAPK7,PIK3R5,PIK3R6,RALA
Endometrial Cancer Signaling	0.00120226	AKT1,LEF1,PIK3R5,PIK3R6,RALA,SOS1
Role of NFAT in Cardiac Hypertrophy	0.00123027	ADCY9,AKT1,CACNB2,GNG12,GNG7,ITPR1,PIK3R5,PIK3R6,PRKAR1B,RALA,RCAN2,SOS1
eNOS Signaling	0.00131826	ADCY9,AKT1,AQP3,CHRNA5,FLT1,ITPR1,LPAR6,PIK3R5,PIK3R6,PRKAR1B
IL-4 Signaling	0.00151356	AKT1,INPP5F,PIK3R5,PIK3R6,RALA,SOS1,SYNJ2
Regulation of the Epithelial-Mesenchymal Transition Pathway	0.00169824	AKT1,ETS1,FGF23,HMGA2,LEF1,NOTCH1,PIK3R5,PIK3R6,RALA,SMAD3,SOS1
IL-23 Signaling Pathway	0.0017378	AKT1,CSF2,PIK3R5,PIK3R6,SOCS3
Myc Mediated Apoptosis Signaling	0.0018197	AKT1,PIK3R5,PIK3R6,RALA,SOS1,YWHAE
Ovarian Cancer Signaling	0.0018197	AKT1,ARRB1,E2F1,LEF1,PIK3R5,PIK3R6,PRKAR1B,RALA,RB1
Cardiac Î²-adrenergic Signaling	0.00194984	ADCY9,GNG12,GNG7,PDE10A,PDE1C,PKIB,PKIG,PPP2R3A,PRKAR1B
Acute Myeloid Leukemia Signaling	0.00194984	AKT1,LEF1,PIK3R5,PIK3R6,RALA,RARA,SOS1
NGF Signaling	0.00194984	AKT1,MAPK7,PIK3R5,PIK3R6,RALA,RHOG,SOS1,TRIO
Adrenomedullin signaling pathway	0.00199526	ADCY9,AKT1,ITPR1,MAPK7,PIK3R5,PIK3R6,PPARG,PRKAR1B,RALA,SOS1,TFAP2E
Apelin Endothelial Signaling Pathway	0.0020893	ADCY9,AKT1,GNAO1,KLF2,PIK3R5,PIK3R6,RALA,SMAD3
IL-8 Signaling	0.00213796	AKT1,FLT1,GNA12,GNG12,GNG7,NOX3,PIK3R5,PIK3R6,PLD2,RALA,RHOG
IL-1 Signaling	0.00223872	ADCY9,GNA12,GNAO1,GNG12,GNG7,IL1RAP,PRKAR1B
Fc Epsilon RI Signaling	0.00234423	AKT1,CSF2,INPP5F,PIK3R5,PIK3R6,RALA,SOS1,SYNJ2
Role of p14/p19ARF in Tumor Suppression	0.00245471	E2F1,PIK3R5,PIK3R6,RB1
Th1 Pathway	0.00301995	GATA3,ICOS,mir-146,NOTCH1,PIK3R5,PIK3R6,RUNX3,SOCS3
Cardiac Hypertrophy Signaling	0.00316228	ADCY9,AKT1,GNA12,GNAO1,GNG12,GNG7,PIK3R5,PIK3R6,PRKAR1B,RALA,RHOG,SOS1
Estrogen-Dependent Breast Cancer Signaling	0.00346737	AKT1,HSD17B12,PIK3R5,PIK3R6,RALA,TERT
Leptin Signaling in Obesity	0.00346737	ADCY9,AKT1,PIK3R5,PIK3R6,PRKAR1B,SOCS3
Epithelial Adherens Junction Signaling	0.00354813	AKT1,LEF1,MAGI1,MYH6,NOTCH1,PARD3,RALA,RAPGEF1,SORBS1
Nitric Oxide Signaling in the Cardiovascular System	0.00354813	AKT1,FLT1,ITPR1,PDE1C,PIK3R5,PIK3R6,PRKAR1B
FcÎ³RIIB Signaling in B Lymphocytes	0.00371535	AKT1,CACNB2,PIK3R5,PIK3R6,RALA,SOS1
Angiopoietin Signaling	0.00371535	AKT1,PIK3R5,PIK3R6,RALA,SOS1,TIE1
VEGF Signaling	0.00380189	AKT1,FLT1,PIK3R5,PIK3R6,RALA,SOS1,YWHAE
B Cell Receptor Signaling	0.00398107	AKT1,BCL6,ETS1,GAB2,INPP5F,PIK3R5,PIK3R6,RALA,SOS1,SYNJ2
Erythropoietin Signaling	0.00398107	AKT1,PIK3R5,PIK3R6,RALA,SOCS3,SOS1
GDNF Family Ligand-Receptor Interactions	0.00398107	ITPR1,PIK3R5,PIK3R6,RALA,RET,SOS1
Endothelin-1 Signaling	0.0040738	ADCY9,GNA12,GNAO1,ITPR1,MAPK7,PIK3R5,PIK3R6,PLD2,RALA,SOS1
GÎ±q Signaling	0.00416869	AKT1,AVPR1B,GNG12,GNG7,ITPR1,PIK3R5,PIK3R6,PLD2,RHOG
p70S6K Signaling	0.0042658	AKT1,F2RL3,PIK3R5,PIK3R6,PPP2R3A,RALA,SOS1,YWHAE
Antiproliferative Role of Somatostatin Receptor 2	0.0042658	CDKN1A,GNG12,GNG7,PIK3R5,PIK3R6,RALA
EGF Signaling	0.00457088	AKT1,ITPR1,PIK3R5,PIK3R6,SOS1
1D-myo-inositol Hexakisphosphate Biosynthesis II (Mammalian)	0.00501187	INPP5F,ITPK1,SYNJ2
RAR Activation	0.00549541	ADCY9,ADH1C,AKT1,DHRS3,PRKAR1B,PRMT1,RARA,RARG,SMAD3,ZBTB16
NF-ÎºB Activation by Viruses	0.0057544	AKT1,CXCR5,ITGAL,PIK3R5,PIK3R6,RALA
PEDF Signaling	0.0057544	AKT1,CFLAR,PIK3R5,PIK3R6,PPARG,RALA
Cell Cycle Regulation by BTG Family Proteins	0.0060256	E2F1,PPP2R3A,PRMT1,RB1
Paxillin Signaling	0.0060256	ARF1,ITGA2B,ITGAL,PIK3R5,PIK3R6,RALA,SOS1
Th2 Pathway	0.0060256	GATA3,GFI1,ICOS,NOTCH1,PIK3R5,PIK3R6,RUNX3,SOCS3
FLT3 Signaling in Hematopoietic Progenitor Cells	0.00616595	AKT1,GAB2,PIK3R5,PIK3R6,RALA,SOS1
VEGF Family Ligand-Receptor Interactions	0.00645654	AKT1,FLT1,PIK3R5,PIK3R6,RALA,SOS1
FGF Signaling	0.00645654	AKT1,FGF23,ITPR1,PIK3R5,PIK3R6,SOS1
CNTF Signaling	0.00660693	AKT1,PIK3R5,PIK3R6,RALA,SOS1
Hereditary Breast Cancer Signaling	0.00691831	AKT1,CDK6,CDKN1A,E2F1,PIK3R5,PIK3R6,RALA,RB1
IL-2 Signaling	0.00707946	AKT1,PIK3R5,PIK3R6,RALA,SOS1
Systemic Lupus Erythematosus In T Cell Signaling Pathway	0.00707946	AKT1,BCL6,ELF1,GNA12,ICOS,ITGAL,ITPR1,PIK3R5,PIK3R6,PPP2R3A,RALA,RHOG,RPTOR,SOS1
PDGF Signaling	0.00724436	INPP5F,PIK3R5,PIK3R6,RALA,SOS1,SYNJ2
Th1 and Th2 Activation Pathway	0.00758578	GATA3,GFI1,ICOS,mir-146,NOTCH1,PIK3R5,PIK3R6,RUNX3,SOCS3
G-Protein Coupled Receptor Signaling	0.00812831	ADCY9,AKT1,AVPR1B,DUSP4,GNAO1,PDE10A,PDE1C,PIK3R5,PIK3R6,PRKAR1B,RALA,SOS1
Thrombopoietin Signaling	0.00812831	GAB2,PIK3R5,PIK3R6,RALA,SOS1
fMLP Signaling in Neutrophils	0.00831764	GNG12,GNG7,ITPR1,NOX3,PIK3R5,PIK3R6,RALA
Renin-Angiotensin Signaling	0.00912011	ADCY9,ITPR1,PIK3R5,PIK3R6,PRKAR1B,RALA,SOS1
ErbB2-ErbB3 Signaling	0.00933254	AKT1,PIK3R5,PIK3R6,RALA,SOS1
Signaling by Rho Family GTPases	0.00954993	ARHGEF3,CDH23,GNA12,GNAO1,GNG12,GNG7,NOX3,PARD3,PIK3R5,PIK3R6,RHOG
Natural Killer Cell Signaling	0.00954993	AKT1,INPP5F,PIK3R5,PIK3R6,RALA,SOS1,SYNJ2
Ephrin Receptor Signaling	0.01	AKT1,GNA12,GNAO1,GNG12,GNG7,RALA,RAPGEF1,SORBS1,SOS1
AMPK Signaling	0.01	AKT1,CDKN1A,CHRNA5,CRTC2,PIK3R5,PIK3R6,PPP2R3A,PRKAR1B,RPTOR,SLC2A1
Role of Tissue Factor in Cancer	0.01	AKT1,ARRB1,CSF2,GNA12,PIK3R5,PIK3R6,RALA
